# Supplementary material for: Regulatory genomic circuitry of human disease loci by integrative epigenomics
Source: PubMed Central journal article supplement (PMC7875769; doi:10.1038/s41586-020-03145-z), 2021-02-03
Supplement: 41586_2020_3145_MOESM1_ESM.pdf [file 41586_2020_3145_MOESM1_ESM.pdf]

---

**Supplementary information**

---

**Regulatory genomic circuitry of human disease loci by integrative epigenomics**

---

In the format provided by the authors and unedited

| Group | BSSID          | Extended Info | Group                 | BSSID | Extended Info | Group    | BSSID                                    | Extended Info |                |          |                             |
|-------|----------------|---------------|-----------------------|-------|---------------|----------|------------------------------------------|---------------|----------------|----------|-----------------------------|
| 1     | Adipose        | BSS00038      | ADIPOCYTE             | 288   | Digestive     | BSS01654 | STOMACH                                  | 575           | Kidney         | BSS01533 | RENAL PELVIS                |
| 2     | Adipose        | BSS00043      | ADIPOSE TISSUE        | 289   | Digestive     | BSS01651 | STOMACH                                  | 576           | Kidney         | BSS01497 | RENAL PELVIS                |
| 3     | Adipose        | BSS01671      | ADIPOSE TISSUE        | 290   | Digestive     | BSS01639 | STOMACH                                  | 577           | Kidney         | BSS01498 | RENAL PELVIS                |
| 4     | Adipose        | BSS01665      | ADIPOSE TISSUE        | 291   | Digestive     | BSS01284 | STOMACH MUCOSA                           | 578           | Kidney         | BSS01153 | RENAL PELVIS                |
| 5     | Adipose        | BSS01666      | ADIPOSE TISSUE        | 292   | Digestive     | BSS01848 | TRANSVERSE COLON                         | 579           | Kidney         | BSS01534 | RENAL PELVIS                |
| 6     | Adipose        | BSS01668      | ADIPOSE TISSUE        | 293   | Digestive     | BSS01851 | TRANSVERSE COLON                         | 580           | Kidney         | BSS01499 | RENAL PELVIS                |
| 7     | Adipose        | BSS01669      | ADIPOSE TISSUE        | 294   | Digestive     | BSS01849 | TRANSVERSE COLON                         | 581           | Liver          | BSS00553 | HEPATIC STELLATE CELL       |
| 8     | Adipose        | BSS01667      | ADIPOSE TISSUE        | 295   | Digestive     | BSS01850 | TRANSVERSE COLON                         | 582           | Liver          | BSS00554 | HEPATOCTYTE                 |
| 9     | Adipose        | BSS01394      | OMENTAL FAT PAD       | 296   | Endocrine     | BSS00282 | ENDOCRINE PANCREAS                       | 583           | Liver          | BSS00511 | LIVER                       |
| 10    | Adipose        | BSS01393      | OMENTAL FAT PAD       | 297   | Endocrine     | BSS00283 | ENDOCRINE PANCREAS                       | 584           | Liver          | BSS01164 | LIVER                       |
| 11    | Blood & T-cell | BSS00188      | CD4 T CELL            | 298   | Endocrine     | BSS00284 | ENDOCRINE PANCREAS                       | 585           | Liver          | BSS01170 | LIVER                       |
| 12    | Blood & T-cell | BSS00185      | CD4 T CELL            | 299   | Endocrine     | BSS00281 | ENDOCRINE PANCREAS                       | 586           | Liver          | BSS01169 | LIVER                       |
| 13    | Blood & T-cell | BSS00189      | CD4 T CELL            | 300   | Endocrine     | BSS01403 | OVARY                                    | 587           | Liver          | BSS01159 | LIVER                       |
| 14    | Blood & T-cell | BSS00190      | CD4 T CELL            | 301   | Endocrine     | BSS01401 | OVARY                                    | 588           | Liver          | BSS01168 | LIVER                       |
| 15    | Blood & T-cell | BSS00183      | CD4 T CELL            | 302   | Endocrine     | BSS01402 | OVARY                                    | 589           | Liver          | BSS01519 | LIVER                       |
| 16    | Blood & T-cell | BSS00186      | CD4 T CELL            | 303   | Endocrine     | BSS01399 | OVARY                                    | 590           | Liver          | BSS01158 | LIVER                       |
| 17    | Blood & T-cell | BSS00191      | CD4 T CELL            | 304   | Endocrine     | BSS01719 | TESTIS                                   | 591           | Lung           | BSS01195 | LUNG                        |
| 18    | Blood & T-cell | BSS00192      | CD4 T CELL            | 305   | Endocrine     | BSS01718 | TESTIS                                   | 592           | Lung           | BSS01142 | LUNG                        |
| 19    | Blood & T-cell | BSS00274      | CD4 T CELL            | 306   | Endocrine     | BSS01715 | TESTIS                                   | 593           | Lung           | BSS01525 | LUNG                        |
| 20    | Blood & T-cell | BSS00195      | CDB T CELL            | 307   | Endocrine     | BSS00052 | ADRENAL GLAND                            | 594           | Lung           | BSS01143 | LUNG                        |
| 21    | Blood & T-cell | BSS00196      | CDB T CELL            | 308   | Endocrine     | BSS00050 | ADRENAL GLAND                            | 595           | Lung           | BSS01526 | LUNG                        |
| 22    | Blood & T-cell | BSS00198      | CDB T CELL            | 309   | Endocrine     | BSS00051 | ADRENAL GLAND                            | 596           | Lung           | BSS01137 | LUNG                        |
| 23    | Blood & T-cell | BSS00200      | CDB T CELL            | 310   | Endocrine     | BSS00059 | ADRENAL GLAND                            | 597           | Lung           | BSS01520 | LUNG                        |
| 24    | Blood & T-cell | BSS00193      | CDB T CELL            | 311   | Endocrine     | BSS00057 | ADRENAL GLAND                            | 598           | Lung           | BSS01138 | LUNG                        |
| 25    | Blood & T-cell | BSS00194      | CDB T CELL            | 312   | Endocrine     | BSS00058 | ADRENAL GLAND                            | 599           | Lung           | BSS01521 | LUNG                        |
| 26    | Blood & T-cell | BSS00197      | CDB T CELL            | 313   | Endocrine     | BSS00045 | ADRENAL GLAND                            | 600           | Lung           | BSS01139 | LUNG                        |
| 27    | Blood & T-cell | BSS01420      | MONONUCLEAR CELL      | 314   | Endocrine     | BSS00046 | ADRENAL GLAND                            | 601           | Lung           | BSS01192 | LUNG                        |
| 28    | Blood & T-cell | BSS01421      | MONONUCLEAR CELL      | 315   | Endocrine     | BSS00047 | ADRENAL GLAND                            | 602           | Lung           | BSS01522 | LUNG                        |
| 29    | Blood & T-cell | BSS01279      | MONONUCLEAR CELL      | 316   | Endocrine     | BSS00048 | ADRENAL GLAND                            | 603           | Lung           | BSS01140 | LUNG                        |
| 30    | Blood & T-cell | BSS01419      | MONONUCLEAR CELL      | 317   | Endocrine     | BSS00054 | ADRENAL GLAND                            | 604           | Lung           | BSS01523 | LUNG                        |
| 31    | Blood & T-cell | BSS01423      | MONONUCLEAR CELL      | 318   | Endocrine     | BSS00060 | ADRENAL GLAND                            | 605           | Lung           | BSS01141 | LUNG                        |
| 32    | Blood & T-cell | BSS01424      | MONONUCLEAR CELL      | 319   | Endocrine     | BSS00055 | ADRENAL GLAND                            | 606           | Lung           | BSS01524 | LUNG                        |
| 33    | Blood & T-cell | BSS01347      | NAIVE T CELL          | 320   | Endocrine     | BSS00056 | ADRENAL GLAND                            | 607           | Lung           | BSS01205 | LUNG                        |
| 34    | Blood & T-cell | BSS01348      | NAIVE T CELL          | 321   | Endocrine     | BSS01831 | THYROID GLAND                            | 608           | Lung           | BSS01147 | LUNG                        |
| 35    | Blood & T-cell | BSS01346      | NAIVE T CELL          | 322   | Endocrine     | BSS01834 | THYROID GLAND                            | 609           | Lung           | BSS01529 | LUNG                        |
| 36    | Blood & T-cell | BSS01688      | T CELL                | 323   | Endocrine     | BSS01832 | THYROID GLAND                            | 610           | Lung           | BSS01148 | LUNG                        |
| 37    | Blood & T-cell | BSS01687      | T CELL                | 324   | Endocrine     | BSS01835 | THYROID GLAND                            | 611           | Lung           | BSS01149 | LUNG                        |
| 38    | Blood & T-cell | BSS01689      | T CELL                | 325   | Endothelial   | BSS00143 | BRAIN MICROVASCULAR ENDOTHELIAL CELL     | 612           | Lung           | BSS01530 | LUNG                        |
| 39    | Blood & T-cell | BSS01684      | T CELL                | 326   | Endothelial   | BSS00387 | GLOMERULUS ENDOTHELIAL CELL              | 613           | Lung           | BSS01202 | LUNG                        |
| 40    | Blood & T-cell | BSS01691      | T1 CELL               | 327   | Endothelial   | BSS01077 | LUNG CAPILLARY ENDOTHELIAL CELL          | 614           | Lung           | BSS01144 | LUNG                        |
| 41    | Blood & T-cell | BSS01692      | T1 CELL               | 328   | Endothelial   | BSS01206 | LUNG MICROVASCULAR ENDOTHELIAL CELL      | 615           | Lung           | BSS01527 | LUNG                        |
| 42    | Blood & T-cell | BSS01690      | T1 CELL               | 329   | Endothelial   | BSS01465 | PULMONARY ARTERY ENDOTHELIAL CELL        | 616           | Lung           | BSS01203 | LUNG                        |
| 43    | Blood & T-cell | BSS01693      | T17 CELL              | 330   | Endothelial   | BSS00298 | UMBILICAL VEIN ENDOTHELIAL CELL          | 617           | Lung           | BSS01145 | LUNG                        |
| 44    | Blood & T-cell | BSS01694      | T17 CELL              | 331   | Endothelial   | BSS00296 | UMBILICAL VEIN ENDOTHELIAL CELL          | 618           | Lung           | BSS01146 | LUNG                        |
| 45    | Blood & T-cell | BSS01695      | T17 CELL              | 332   | Endothelial   | BSS00258 | DERMIS BLOOD VESSEL ENDOTHELIAL CELL     | 619           | Lung           | BSS01528 | LUNG                        |
| 46    | Blood & T-cell | BSS01697      | T2 CELL               | 333   | Endothelial   | BSS00260 | DERMIS BLOOD VESSEL ENDOTHELIAL CELL     | 620           | Lung           | BSS01204 | LUNG                        |
| 47    | Blood & T-cell | BSS01698      | T2 CELL               | 334   | Endothelial   | BSS00262 | DERMIS LYMPHATIC VESSEL ENDOTHELIAL CELL | 621           | Lung           | BSS01189 | LUNG                        |
| 48    | Blood & T-cell | BSS01696      | T2 CELL               | 335   | Endothelial   | BSS00264 | DERMIS LYMPHATIC VESSEL ENDOTHELIAL CELL | 622           | Lung           | BSS01188 | LUNG                        |
| 49    | Blood & T-cell | BSS01478      | TREG CELL             | 336   | Epithelial    | BSS00704 | BONE MARROW EPITHELIAL CELL              | 623           | Lung           | BSS01187 | LUNG                        |
| 50    | Blood & T-cell | BSS01479      | TREG CELL             | 337   | Epithelial    | BSS00218 | CHOROID PLEXUS EPITHELIAL CELL           | 624           | Lung           | BSS01198 | LUNG                        |
| 51    | Blood & T-cell | BSS01480      | TREG CELL             | 338   | Epithelial    | BSS00223 | COLON EPITHELIAL CELL                    | 625           | Lung           | BSS01186 | LUNG                        |
| 52    | Bone           | BSS00084      | BONE ARM              | 339   | Epithelial    | BSS00307 | ESOPHAGUS EPITHELIAL CELL                | 626           | Lung           | BSS01869 | LUNG                        |
| 53    | Bone           | BSS00330      | BONE FEMUR            | 340   | Epithelial    | BSS00743 | IRIS PIGMENT EPITHELIAL CELL             | 627           | Lung           | BSS01196 | LUNG                        |
| 54    | Bone           | BSS01154      | BONE LEG              | 341   | Epithelial    | BSS01385 | NON-PIGMENTED CILIARY EPITHELIAL CELL    | 628           | Lung           | BSS01197 | LUNG                        |
| 55    | Bone           | BSS00705      | BONE MARROW STROMA    | 342   | Epithelial    | BSS01092 | GLOMERULUS EPITHELIAL CELL               | 629           | Lung           | BSS01871 | LUNG                        |
| 56    | Bone           | BSS01397      | OSTEOBLAST            | 343   | Epithelial    | BSS00389 | GLOMERULUS VISCERAL EPITHELIAL CELL      | 630           | Lung           | BSS01201 | LUNG                        |
| 57    | Brain          | BSS00071      | AMMONS HORN           | 344   | Epithelial    | BSS01080 | KIDNEY EPITHELIAL CELL                   | 631           | Lung           | BSS01190 | LUNG                        |
| 58    | Brain          | BSS00077      | ANGULAR GYRUS         | 345   | Epithelial    | BSS00310 | PROXIMAL TUBULE EPITHELIAL CELL          | 632           | Lung           | BSS01870 | LUNG                        |
| 59    | Brain          | BSS00078      | ANGULAR GYRUS         | 346   | Epithelial    | BSS00701 | PROXIMAL TUBULE EPITHELIAL CELL          | 633           | Lung           | BSS01193 | LUNG                        |
| 60    | Brain          | BSS00089      | ASTROCYTE             | 347   | Epithelial    | BSS01491 | RENAL CORTICAL EPITHELIAL CELL           | 634           | Lymphoblastoid | BSS00403 | LYMPHOBLASTOID CELL LINE    |
| 61    | Brain          | BSS00090      | ASTROCYTE CEREBELLUM  | 348   | Epithelial    | BSS01505 | RETINAL EPITHELIAL CELL                  | 635           | Lymphoblastoid | BSS00462 | LYMPHOBLASTOID CELL LINE    |
| 62    | Brain          | BSS00091      | ASTROCYTE HIPPOCAMPUS | 349   | Epithelial    | BSS01103 | TUBULE CELL                              | 636           | Lymphoblastoid | BSS00456 | LYMPHOBLASTOID CELL LINE    |
| 63    | Brain          | BSS00092      | ASTROCYTE SPINAL CORD | 350   | Epithelial    | BSS01102 | TUBULE CELL                              | 637           | Lymphoblastoid | BSS00457 | LYMPHOBLASTOID CELL LINE    |
| 64    | Brain          | BSS00135      | BRAIN                 | 351   | Epithelial    | BSS00153 | BRONCHIAL EPITHELIAL CELL                | 638           | Lymphoblastoid | BSS00438 | LYMPHOBLASTOID CELL LINE    |
| 65    | Brain          | BSS00136      | BRAIN                 | 352   | Epithelial    | BSS00150 | BRONCHIAL EPITHELIAL CELL                | 639           | Lymphoblastoid | BSS00473 | LYMPHOBLASTOID CELL LINE    |
| 66    | Brain          | BSS00129      | BRAIN                 | 353   | Epithelial    | BSS00703 | PANCREATIC DUCT EPITHELIAL CELL          | 640           | Lymphoblastoid | BSS00471 | LYMPHOBLASTOID CELL LINE    |
| 67    | Brain          | BSS00130      | BRAIN                 | 354   | Epithelial    | BSS00075 | AMNION EPITHELIAL CELL                   | 641           | Lymphoblastoid | BSS00474 | LYMPHOBLASTOID CELL LINE    |
| 68    | Brain          | BSS00131      | BRAIN                 | 355   | Epithelial    | BSS00308 | PROSTATE EPITHELIAL CELL                 | 642           | Lymphoblastoid | BSS00404 | LYMPHOBLASTOID CELL LINE    |
| 69    | Brain          | BSS00133      | BRAIN                 | 356   | Epithelial    | BSS00309 | PROSTATE EPITHELIAL CELL                 | 643           | Lymphoblastoid | BSS00405 | LYMPHOBLASTOID CELL LINE    |
| 70    | Brain          | BSS00138      | BRAIN                 | 357   | Epithelial    | BSS01539 | PROSTATE EPITHELIAL CELL                 | 644           | Lymphoblastoid | BSS00472 | LYMPHOBLASTOID CELL LINE    |
| 71    | Brain          | BSS00139      | BRAIN                 | 358   | Epithelial    | BSS01538 | PROSTATE EPITHELIAL CELL                 | 645           | Lymphoblastoid | BSS00428 | LYMPHOBLASTOID CELL LINE    |
| 72    | Brain          | BSS00140      | BRAIN                 | 359   | Epithelial    | BSS01217 | BREAST EPITHELIAL CELL                   | 646           | Lymphoblastoid | BSS00454 | LYMPHOBLASTOID CELL LINE    |
| 73    | Brain          | BSS00142      | BRAIN                 | 360   | Epithelial    | BSS01224 | BREAST EPITHELIAL CELL                   | 647           | Lymphoblastoid | BSS00427 | LYMPHOBLASTOID CELL LINE    |
| 74    | Brain          | BSS00126      | BRAIN                 | 361   | Epithelial    | BSS01225 | BREAST EPITHELIAL CELL                   | 648           | Lymphoblastoid | BSS00452 | LYMPHOBLASTOID CELL LINE    |
| 75    | Brain          | BSS00127      | BRAIN                 | 362   | Epithelial    | BSS00356 | FORESKIN KERATINOCYTE                    | 649           | Lymphoblastoid | BSS00395 | LYMPHOBLASTOID CELL LINE    |
| 76    | Brain          | BSS00125      | BRAIN                 | 363   | Epithelial    | BSS00357 | FORESKIN KERATINOCYTE                    | 650           | Lymphoblastoid | BSS00439 | LYMPHOBLASTOID CELL LINE    |
| 77    | Brain          | BSS00132      | BRAIN                 | 364   | Epithelial    | BSS00358 | FORESKIN KERATINOCYTE                    | 651           | Mesench        | BSS00039 | ADIPOCYTE FROM MSC          |
| 78    | Brain          | BSS00134      | BRAIN                 | 365   | Epithelial    | BSS00359 | FORESKIN KERATINOCYTE                    | 652           | Mesench        | BSS00250 | AMNIOTIC FLUID FROM MSC     |
| 79    | Brain          | BSS00141      | BRAIN                 | 366   | Epithelial    | BSS00360 | FORESKIN KERATINOCYTE                    | 653           | Mesench        | BSS00279 | EMBRYONIC FACIAL PROMINENCE |
| 80    | Brain          | BSS00174      | CAUDATE NUCLEUS       | 367   | Epithelial    | BSS00362 | FORESKIN KERATINOCYTE                    | 654           | Mesench        | BSS01260 | MESENCHYMAL STEM CELL       |
| 81    | Brain          | BSS00175      | CAUDATE NUCLEUS       | 368   | Epithelial    | BSS00363 | FORESKIN KERATINOCYTE                    | 655           | Muscle         | BSS01293 | ARM MUSCLE                  |
| 82    | Brain          | BSS00173      | CAUDATE NUCLEUS       | 369   | Epithelial    | BSS00364 | FORESKIN KERATINOCYTE                    | 656           | Muscle         | BSS01294 | ARM MUSCLE                  |
| 83    | Brain          | BSS00201      | CEREBELLAR CORTEX     | 370   | Epithelial    | BSS00365 | FORESKIN KERATINOCYTE                    | 657           | Muscle         | BSS01290 | ARM MUSCLE                  |
| 84    | Brain          | BSS00205      | CEREBELLUM            | 371   | Epithelial    | BSS00366 | FORESKIN KERATINOCYTE                    | 658           | Muscle         | BSS00352 | ARM MUSCLE                  |
| 85    | Brain          | BSS00207      | CEREBELLUM            | 372   | Epithelial    | BSS00355 | FORESKIN KERATINOCYTE                    | 659           | Muscle         | BSS01291 | ARM MUSCLE                  |

**Figure S1:** Sample list with tissue group, unique identifier, and short name for 859 observed/imputed samples (full metadata in Table S1, page 1 of 4).

| Group  | BSSID    | Extended Info                  | Group      | BSSID    | Extended Info                   | Group          | BSSID    | Extended Info                  |
|--------|----------|--------------------------------|------------|----------|---------------------------------|----------------|----------|--------------------------------|
| Brain  | BSS00206 | CEREBELLUM                     | Epithelial | BSS00361 | FORESKIN KERATINOCYTE           | Muscle         | BSS01292 | ARM MUSCLE                     |
| Brain  | BSS00219 | CINGULATE GYRUS                | Epithelial | BSS00367 | FORESKIN KERATINOCYTE           | Muscle         | BSS01303 | ARM MUSCLE                     |
| Brain  | BSS00220 | CINGULATE GYRUS                | Epithelial | BSS00354 | FORESKIN KERATINOCYTE           | Muscle         | BSS01304 | ARM MUSCLE                     |
| Brain  | BSS00369 | FRONTAL CORTEX                 | Epithelial | BSS01071 | KERATINOCYTE                    | Muscle         | BSS01295 | ARM MUSCLE                     |
| Brain  | BSS00371 | FRONTAL CORTEX                 | Epithelial | BSS01068 | KERATINOCYTE                    | Muscle         | BSS01296 | ARM MUSCLE                     |
| Brain  | BSS00385 | GERMINAL MATRIX                | Epithelial | BSS01209 | MAMMARY EPITHELIAL CELL         | Muscle         | BSS01297 | ARM MUSCLE                     |
| Brain  | BSS00386 | GLOBUS PALLIDUS                | Epithelial | BSS01211 | MAMMARY EPITHELIAL CELL         | Muscle         | BSS01298 | ARM MUSCLE                     |
| Brain  | BSS01125 | HIPPOCAMPUS                    | Epithelial | BSS01213 | MAMMARY EPITHELIAL CELL         | Muscle         | BSS01299 | ARM MUSCLE                     |
| Brain  | BSS01126 | HIPPOCAMPUS                    | Epithelial | BSS01185 | MAMMARY LUMINAL EPITHELIAL CELL | Muscle         | BSS01300 | ARM MUSCLE                     |
| Brain  | BSS01124 | HIPPOCAMPUS                    | Epithelial | BSS01340 | MAMMARY MYOEPITHELIAL CELL      | Muscle         | BSS01301 | ARM MUSCLE                     |
| Brain  | BSS00729 | INFERIOR PARIETAL CORTEX       | Epithelial | BSS01341 | MAMMARY MYOEPITHELIAL CELL      | Muscle         | BSS01289 | ARM MUSCLE                     |
| Brain  | BSS01250 | MEDULLA OBLONGATA              | Epithelial | BSS01181 | SKIN LEG                        | Muscle         | BSS01308 | BACK MUSCLE                    |
| Brain  | BSS01270 | MIDBRAIN                       | Epithelial | BSS01182 | SKIN LEG                        | Muscle         | BSS01309 | BACK MUSCLE                    |
| Brain  | BSS01271 | MIDDLE FRONTAL AREA            | Epithelial | BSS01587 | SKIN OF BODY                    | Muscle         | BSS01305 | BACK MUSCLE                    |
| Brain  | BSS01272 | MIDDLE FRONTAL AREA            | ES-deriv   | BSS00112 | BIPOLAR NEURON DERIV            | Muscle         | BSS01306 | BACK MUSCLE                    |
| Brain  | BSS01273 | MIDDLE FRONTAL GYRUS           | ES-deriv   | BSS01366 | NEURAL DERIV                    | Muscle         | BSS01307 | BACK MUSCLE                    |
| Brain  | BSS01388 | OCCIPITAL LOBE                 | ES-deriv   | BSS00272 | NEURAL PROGENITOR DERIV         | Muscle         | BSS01315 | BACK MUSCLE                    |
| Brain  | BSS01451 | PONS                           | ES-deriv   | BSS01372 | NEURAL PROGENITOR DERIV         | Muscle         | BSS01316 | BACK MUSCLE                    |
| Brain  | BSS01452 | POSTERIOR CINGULATE CORTEX     | ES-deriv   | BSS01370 | NEURAL PROGENITOR DERIV         | Muscle         | BSS01317 | BACK MUSCLE                    |
| Brain  | BSS01469 | PUTAMEN                        | ES-deriv   | BSS01371 | NEURAL PROGENITOR DERIV         | Muscle         | BSS01310 | BACK MUSCLE                    |
| Brain  | BSS01675 | SUBSTANTIA NIGRA               | ES-deriv   | BSS01375 | NEURON DERIV                    | Muscle         | BSS01311 | BACK MUSCLE                    |
| Brain  | BSS01676 | SUBSTANTIA NIGRA               | ES-deriv   | BSS00169 | CARDIAC MESODERM DERIV          | Muscle         | BSS01312 | BACK MUSCLE                    |
| Brain  | BSS01677 | SUPERIOR TEMPORAL GYRUS        | ES-deriv   | BSS00171 | CARDIAC MUSCLE DERIV            | Muscle         | BSS01313 | BACK MUSCLE                    |
| Brain  | BSS01714 | TEMPORAL LOBE                  | ES-deriv   | BSS00556 | HEPATOCTYTE DERIV               | Muscle         | BSS01314 | BACK MUSCLE                    |
| Brain  | BSS01712 | TEMPORAL LOBE                  | ES-deriv   | BSS01261 | MESENCHYMAL STEM DERIV          | Muscle         | BSS00170 | CARDIAC MYOCYTE                |
| Cancer | BSS01105 | ACUTE LYMPHOBLASTIC LEUKEMIA   | ES-deriv   | BSS01857 | TROPHOBLAST DERIV               | Muscle         | BSS00376 | GASTROCNEMIUS MEDIALIS         |
| Cancer | BSS00267 | ACUTE LYMPHOBLASTIC LEUKEMIA   | ES-deriv   | BSS01612 | SMOOTH MUSCLE DERIV             | Muscle         | BSS00378 | GASTROCNEMIUS MEDIALIS         |
| Cancer | BSS01178 | ACUTE LYMPHOBLASTIC LEUKEMIA   | ES-deriv   | BSS00273 | ECTODERMAL DERIV                | Muscle         | BSS00377 | GASTROCNEMIUS MEDIALIS         |
| Cancer | BSS01267 | OSTEOSARCOMA                   | ES-deriv   | BSS00285 | ENDODERMAL CELL                 | Muscle         | BSS00379 | GASTROCNEMIUS MEDIALIS         |
| Cancer | BSS01550 | OSTEOSARCOMA                   | ES-deriv   | BSS00287 | ENDODERMAL DERIV                | Muscle         | BSS01322 | LEG MUSCLE                     |
| Cancer | BSS00246 | DESMOPLASTIC MEDULLOBLASTOMA   | ES-deriv   | BSS01263 | MESENODERM DERIV                | Muscle         | BSS01318 | LEG MUSCLE                     |
| Cancer | BSS01208 | GLIOBLASTOMA                   | ES-deriv   | BSS01264 | MESODERMAL DERIV                | Muscle         | BSS01320 | LEG MUSCLE                     |
| Cancer | BSS00004 | GLIOBLASTOMA                   | ESC        | BSS00277 | ESC                             | Muscle         | BSS01321 | LEG MUSCLE                     |
| Cancer | BSS00482 | GLIOBLASTOMA                   | ESC        | BSS00315 | ESC                             | Muscle         | BSS01329 | LEG MUSCLE                     |
| Cancer | BSS01251 | MEDULLOBLASTOMA                | ESC        | BSS01866 | ESC                             | Muscle         | BSS01330 | LEG MUSCLE                     |
| Cancer | BSS01554 | NEUROBLASTOMA                  | ESC        | BSS00483 | ESC                             | Muscle         | BSS01323 | LEG MUSCLE                     |
| Cancer | BSS01558 | NEUROBLASTOMA                  | ESC        | BSS00715 | ESC                             | Muscle         | BSS01324 | LEG MUSCLE                     |
| Cancer | BSS00102 | NEUROBLASTOMA                  | ESC        | BSS00716 | ESC                             | Muscle         | BSS01325 | LEG MUSCLE                     |
| Cancer | BSS01571 | NEUROBLASTOMA                  | ESC        | BSS00717 | ESC                             | Muscle         | BSS01327 | LEG MUSCLE                     |
| Cancer | BSS01562 | NEUROBLASTOMA                  | ESC        | BSS00484 | ESC                             | Muscle         | BSS00700 | LEG MUSCLE                     |
| Cancer | BSS01559 | NEUROEPITHELIOMA               | ESC        | BSS00478 | ESC                             | Muscle         | BSS01328 | LEG MUSCLE                     |
| Cancer | BSS00481 | NEUROGLIOMA                    | eye        | BSS00329 | EYE                             | Muscle         | BSS01319 | LEG MUSCLE                     |
| Cancer | BSS01535 | COLON CARCINOMA                | eye        | BSS00328 | EYE                             | Muscle         | BSS01460 | PSOAS MUSCLE                   |
| Cancer | BSS01682 | COLORECTAL ADENOCARCINOMA      | eye        | BSS01504 | EYE RETINA                      | Muscle         | BSS01461 | PSOAS MUSCLE                   |
| Cancer | BSS00708 | COLORECTAL ADENOCARCINOMA      | eye        | BSS01503 | EYE RETINA                      | Muscle         | BSS01462 | PSOAS MUSCLE                   |
| Cancer | BSS01179 | COLORECTAL ADENOCARCINOMA      | eye        | BSS01502 | EYE RETINA                      | Muscle         | BSS01463 | PSOAS MUSCLE                   |
| Cancer | BSS00159 | COLORECTAL ADENOCARCINOMA      | Heart      | BSS00079 | AORTA                           | Muscle         | BSS01581 | SKELETAL MUSCLE                |
| Cancer | BSS00492 | COLORECTAL ADENOCARCINOMA      | Heart      | BSS00080 | AORTA                           | Muscle         | BSS01577 | SKELETAL MUSCLE                |
| Cancer | BSS01412 | PARATHYROID ADENOMA            | Heart      | BSS00088 | ASCENDING AORTA                 | Muscle         | BSS01578 | SKELETAL MUSCLE                |
| Cancer | BSS01411 | PARATHYROID ADENOMA            | Heart      | BSS00087 | ASCENDING AORTA                 | Muscle         | BSS01572 | SKELETAL MUSCLE CELL           |
| Cancer | BSS01386 | TESTICULAR EMBRYONAL CARCINOMA | Heart      | BSS00242 | CORONARY ARTERY                 | Muscle         | BSS01845 | TONGUE                         |
| Cancer | BSS01536 | MELANOMA                       | Heart      | BSS00243 | CORONARY ARTERY                 | Muscle         | BSS01846 | TONGUE                         |
| Cancer | BSS01551 | MELANOMA                       | Heart      | BSS00505 | HEART                           | Muscle         | BSS01331 | TRUNK MUSCLE                   |
| Cancer | BSS00222 | MELANOMA                       | Heart      | BSS00498 | HEART                           | Muscle         | BSS01333 | TRUNK MUSCLE                   |
| Cancer | BSS01365 | MYELOMA                        | Heart      | BSS00499 | HEART                           | Muscle         | BSS01334 | TRUNK MUSCLE                   |
| Cancer | BSS01890 | EYE RETINOBLASTOMA             | Heart      | BSS00500 | HEART                           | Muscle         | BSS01332 | TRUNK MUSCLE                   |
| Cancer | BSS00702 | ACUTE PROMYELOCYTIC LEUKEMIA   | Heart      | BSS00502 | HEART                           | Myosat         | BSS01338 | MYOCYTE                        |
| Cancer | BSS01356 | ACUTE PROMYELOCYTIC LEUKEMIA   | Heart      | BSS00503 | HEART                           | Myosat         | BSS01344 | MYOTUBE                        |
| Cancer | BSS01391 | B CELL LYMPHOMA                | Heart      | BSS00501 | HEART                           | Myosat         | BSS01155 | SKELETAL MUSCLE MYOBLAST       |
| Cancer | BSS01390 | B CELL LYMPHOMA                | Heart      | BSS00516 | HEART                           | Myosat         | BSS01573 | SKELETAL MUSCLE MYOBLAST       |
| Cancer | BSS01065 | B CELL LYMPHOMA                | Heart      | BSS00522 | HEART                           | Myosat         | BSS01574 | SKELETAL MUSCLE MYOBLAST       |
| Cancer | BSS00268 | B CELL LYMPHOMA                | Heart      | BSS00518 | HEART                           | Myosat         | BSS01576 | SKELETAL MUSCLE SATELLITE CELL |
| Cancer | BSS01664 | B CELL LYMPHOMA                | Heart      | BSS00519 | HEART                           | Neurosph       | BSS01378 | NEUROSPHERE                    |
| Cancer | BSS01389 | B CELL LYMPHOMA                | Heart      | BSS00514 | HEART                           | Neurosph       | BSS01379 | NEUROSPHERE                    |
| Cancer | BSS01350 | BURKITT LYMPHOMA               | Heart      | BSS00520 | HEART                           | Neurosph       | BSS01377 | NEUROSPHERE                    |
| Cancer | BSS01351 | BURKITT LYMPHOMA               | Heart      | BSS00495 | HEART                           | Neurosph       | BSS01392 | OLFACTORY NEUROSPHERE          |
| Cancer | BSS00491 | HAPLOID MYELOGENOUS LEUKEMIA   | Heart      | BSS00448 | HEART                           | Other          | BSS00148 | BREAST EPITHELIUM              |
| Cancer | BSS01038 | MYELOGENOUS LEUKEMIA           | Heart      | BSS00494 | HEART                           | Other          | BSS00145 | BREAST EPITHELIUM              |
| Cancer | BSS01039 | MYELOGENOUS LEUKEMIA           | Heart      | BSS00521 | HEART                           | Other          | BSS00146 | BREAST EPITHELIUM              |
| Cancer | BSS01056 | MYELOGENOUS LEUKEMIA           | Heart      | BSS00517 | HEART                           | Other          | BSS00304 | EPIDERMAL MELANOCYTE           |
| Cancer | BSS01057 | MYELOGENOUS LEUKEMIA           | Heart      | BSS00493 | HEART                           | Other          | BSS00368 | FORESKIN MELANOCYTE            |
| Cancer | BSS01059 | MYELOGENOUS LEUKEMIA           | Heart      | BSS01127 | HEART LEFT ATRIUM               | Other          | BSS01156 | LIMB EMBRYO                    |
| Cancer | BSS00221 | MYELOGENOUS LEUKEMIA           | Heart      | BSS00509 | HEART LEFT VENTRICLE            | Other          | BSS01157 | LIMB EMBRYO                    |
| Cancer | BSS01066 | MYELOGENOUS LEUKEMIA           | Heart      | BSS00508 | HEART LEFT VENTRICLE            | Other          | BSS01216 | MAMMARY STEM CELL              |
| Cancer | BSS00762 | MYELOGENOUS LEUKEMIA           | Heart      | BSS00506 | HEART LEFT VENTRICLE            | Pancreas       | BSS00121 | BODY OF PANCREAS               |
| Cancer | BSS01104 | MYELOMA                        | Heart      | BSS00513 | HEART LEFT VENTRICLE            | Pancreas       | BSS00122 | BODY OF PANCREAS               |
| Cancer | BSS01274 | MYELOMA                        | Heart      | BSS00512 | HEART LEFT VENTRICLE            | Pancreas       | BSS00123 | BODY OF PANCREAS               |
| Cancer | BSS01537 | PLASMA CELL MYELOMA            | Heart      | BSS00507 | HEART LEFT VENTRICLE            | Pancreas       | BSS00124 | BODY OF PANCREAS               |
| Cancer | BSS00160 | KIDNEY CLEAR CELL CARCINOMA    | Heart      | BSS01506 | HEART RIGHT ATRIUM              | Pancreas       | BSS00758 | ISLET PRECURSOR CELL           |
| Cancer | BSS00372 | KIDNEY RHABDIOID TUMOR         | Heart      | BSS01508 | HEART RIGHT ATRIUM              | Pancreas       | BSS01406 | PANCREAS                       |
| Cancer | BSS00037 | RENAL CELL ADENOCARCINOMA      | Heart      | BSS01507 | HEART RIGHT ATRIUM              | Pancreas       | BSS01407 | PANCREAS                       |
| Cancer | BSS01474 | RENAL CELL ADENOCARCINOMA      | Heart      | BSS00523 | HEART RIGHT VENTRICLE           | Placenta & EEM | BSS00074 | AMNION                         |
| Cancer | BSS01481 | RENAL CELL CARCINOMA           | Heart      | BSS00524 | HEART RIGHT VENTRICLE           | Placenta & EEM | BSS00076 | AMNION STEM CELL               |
| Cancer | BSS00718 | HEPATOCELLULAR CARCINOMA       | Heart      | BSS00525 | HEART RIGHT VENTRICLE           | Placenta & EEM | BSS00209 | CHORION                        |

Figure S1: (continued, 2 of 4)

| Group     | BSSID    | Extended Info                      | Group        | BSSID    | Extended Info               | Group          | BSSID    | Extended Info                        |
|-----------|----------|------------------------------------|--------------|----------|-----------------------------|----------------|----------|--------------------------------------|
| Cancer    | BSS00719 | HEPATOCELLULAR CARCINOMA           | Heart        | BSS01815 | THORACIC AORTA              | Placenta & EEM | BSS00211 | CHORION                              |
| Cancer    | BSS00558 | HEPATOCELLULAR CARCINOMA           | Heart        | BSS01814 | THORACIC AORTA              | Placenta & EEM | BSS00212 | CHORION                              |
| Cancer    | BSS01360 | LARGE CELL LUNG CANCER             | Heart        | BSS01839 | TIBIAL ARTERY               | Placenta & EEM | BSS00215 | CHORIONIC VILLUS                     |
| Cancer    | BSS01415 | LUNG ADENOCARCINOMA                | Heart        | BSS01838 | TIBIAL ARTERY               | Placenta & EEM | BSS00216 | CHORIONIC VILLUS                     |
| Cancer    | BSS00017 | LUNG EPITHELIAL CARCINOMA          | Heart        | BSS01837 | TIBIAL ARTERY               | Placenta & EEM | BSS00217 | CHORIONIC VILLUS                     |
| Cancer    | BSS00019 | LUNG EPITHELIAL CARCINOMA          | HSC & B-cell | BSS00097 | B CELL                      | Placenta & EEM | BSS00214 | CHORIONIC VILLUS                     |
| Cancer    | BSS00021 | LUNG EPITHELIAL CARCINOMA          | HSC & B-cell | BSS01345 | B CELL                      | Placenta & EEM | BSS01440 | PLACENTA                             |
| Cancer    | BSS00022 | LUNG EPITHELIAL CARCINOMA          | HSC & B-cell | BSS00098 | B CELL                      | Placenta & EEM | BSS01436 | PLACENTA                             |
| Cancer    | BSS00027 | LUNG EPITHELIAL CARCINOMA          | HSC & B-cell | BSS00093 | B CELL                      | Placenta & EEM | BSS01437 | PLACENTA                             |
| Cancer    | BSS00016 | LUNG EPITHELIAL CARCINOMA          | HSC & B-cell | BSS00096 | B CELL                      | Placenta & EEM | BSS01435 | PLACENTA                             |
| Cancer    | BSS00020 | LUNG EPITHELIAL CARCINOMA          | HSC & B-cell | BSS00100 | B CELL                      | Placenta & EEM | BSS01443 | PLACENTA                             |
| Cancer    | BSS00023 | LUNG EPITHELIAL CARCINOMA          | HSC & B-cell | BSS00101 | B CELL                      | Placenta & EEM | BSS01444 | PLACENTA                             |
| Cancer    | BSS00024 | LUNG EPITHELIAL CARCINOMA          | HSC & B-cell | BSS00095 | B CELL                      | Placenta & EEM | BSS01433 | PLACENTA                             |
| Cancer    | BSS00026 | LUNG EPITHELIAL CARCINOMA          | HSC & B-cell | BSS00179 | CD14 MONOCYTE               | Placenta & EEM | BSS01432 | PLACENTA                             |
| Cancer    | BSS00028 | LUNG EPITHELIAL CARCINOMA          | HSC & B-cell | BSS00181 | CD14 MONOCYTE               | Placenta & EEM | BSS01430 | PLACENTA                             |
| Cancer    | BSS00029 | LUNG EPITHELIAL CARCINOMA          | HSC & B-cell | BSS00180 | CD14 MONOCYTE               | Placenta & EEM | BSS01448 | PLACENTA                             |
| Cancer    | BSS00018 | LUNG EPITHELIAL CARCINOMA          | HSC & B-cell | BSS00178 | CD14 MONOCYTE               | Placenta & EEM | BSS01446 | PLACENTA                             |
| Cancer    | BSS00025 | LUNG EPITHELIAL CARCINOMA          | HSC & B-cell | BSS00182 | CD14 MYELOID DENDRITIC CELL | Placenta & EEM | BSS01441 | PLACENTA                             |
| Cancer    | BSS00030 | LUNG EPITHELIAL CARCINOMA          | HSC & B-cell | BSS00233 | CD34 CMP                    | Placenta & EEM | BSS01431 | PLACENTA                             |
| Cancer    | BSS00007 | LUNG EPITHELIAL CARCINOMA          | HSC & B-cell | BSS00230 | CD34 CMP                    | Placenta & EEM | BSS01438 | PLACENTA                             |
| Cancer    | BSS00013 | LUNG EPITHELIAL CARCINOMA          | HSC & B-cell | BSS00236 | CD34 CMP                    | Placenta & EEM | BSS00714 | TROPHOBLAST                          |
| Cancer    | BSS00015 | LUNG EPITHELIAL CARCINOMA          | HSC & B-cell | BSS00238 | CD34 CMP                    | Placenta & EEM | BSS01856 | TROPHOBLAST                          |
| Cancer    | BSS01359 | SQUAMOUS CELL CARCINOMA            | HSC & B-cell | BSS00240 | CD34 CMP                    | Placenta & EEM | BSS01853 | TROPHOBLAST                          |
| Cancer    | BSS00035 | MUSCLE EWING SARCOMA               | HSC & B-cell | BSS00241 | CD34 CMP                    | Placenta & EEM | BSS01855 | TROPHOBLAST                          |
| Cancer    | BSS01549 | RHABDYOYOSARCOMA                   | HSC & B-cell | BSS00234 | CD34 CMP                    | Placenta & EEM | BSS01852 | TROPHOBLAST                          |
| Cancer    | BSS00036 | ADENOID CYSTIC CARCINOMA           | HSC & B-cell | BSS00235 | CD34 CMP                    | Placenta & EEM | BSS01859 | TROPHOBLAST                          |
| Cancer    | BSS01240 | MAMMARY GLAND ADENOCARCINOMA       | HSC & B-cell | BSS00229 | CD34 CMP                    | Placenta & EEM | BSS01860 | TROPHOBLAST                          |
| Cancer    | BSS01243 | MAMMARY GLAND ADENOCARCINOMA       | HSC & B-cell | BSS00237 | CD34 CMP                    | Placenta & EEM | BSS01867 | UMBILICAL CORD                       |
| Cancer    | BSS01244 | MAMMARY GLAND ADENOCARCINOMA       | HSC & B-cell | BSS00239 | CD34 CMP                    | PNS            | BSS01618 | SPINAL CORD                          |
| Cancer    | BSS01235 | MAMMARY GLAND ADENOCARCINOMA       | HSC & B-cell | BSS00231 | CD34 CMP                    | PNS            | BSS01619 | SPINAL CORD                          |
| Cancer    | BSS01226 | MAMMARY GLAND ADENOCARCINOMA       | HSC & B-cell | BSS00232 | CD34 CMP                    | PNS            | BSS01617 | SPINAL CORD                          |
| Cancer    | BSS01699 | MAMMARY GLAND DUCTAL CARCINOMA     | HSC & B-cell | BSS00384 | GERMINAL CENTER             | PNS            | BSS01621 | SPINAL CORD                          |
| Cancer    | BSS01705 | MAMMARY GLAND DUCTAL CARCINOMA     | HSC & B-cell | BSS00760 | LYMPHOCTE                   | PNS            | BSS01620 | SPINAL CORD                          |
| Cancer    | BSS00003 | PANCREAS ADENOCARCINOMA            | HSC & B-cell | BSS00544 | MPP                         | PNS            | BSS01614 | SPINAL CORD                          |
| Cancer    | BSS01405 | PANCREAS DUCT EPITHELIAL CARCINOMA | HSC & B-cell | BSS00545 | MPP                         | PNS            | BSS01613 | SPINAL CORD                          |
| Cancer    | BSS00541 | CERVIX ADENOCARCINOMA              | HSC & B-cell | BSS00546 | MPP                         | PNS            | BSS01842 | TIBIAL NERVE                         |
| Cancer    | BSS00531 | CERVIX ADENOCARCINOMA              | HSC & B-cell | BSS00547 | MPP                         | PNS            | BSS01840 | TIBIAL NERVE                         |
| Cancer    | BSS00529 | CERVIX ADENOCARCINOMA              | HSC & B-cell | BSS00548 | MPP                         | PNS            | BSS01841 | TIBIAL NERVE                         |
| Cancer    | BSS00748 | ENDOMETRIAL ADENOCARCINOMA         | HSC & B-cell | BSS00549 | MPP                         | Reproductive   | BSS01456 | PROSTATE GLAND                       |
| Cancer    | BSS00756 | ENDOMETRIAL ADENOCARCINOMA         | HSC & B-cell | BSS00550 | MPP                         | Reproductive   | BSS01457 | PROSTATE GLAND                       |
| Cancer    | BSS00745 | ENDOMETRIAL ADENOCARCINOMA         | HSC & B-cell | BSS00551 | MPP                         | Reproductive   | BSS01459 | PROSTATE GLAND                       |
| Cancer    | BSS01174 | PROSTATE ADENOCARCINOMA            | HSC & B-cell | BSS00552 | MPP                         | Reproductive   | BSS01884 | UTERUS                               |
| Cancer    | BSS01173 | PROSTATE ADENOCARCINOMA            | HSC & B-cell | BSS00543 | MPP                         | Reproductive   | BSS01886 | VAGINA                               |
| Cancer    | BSS01414 | PROSTATE ADENOCARCINOMA            | HSC & B-cell | BSS01381 | NEUTROPHIL                  | Reproductive   | BSS01887 | VAGINA                               |
| Cancer    | BSS00157 | PROSTATE CANCER                    | HSC & B-cell | BSS01380 | NEUTROPHIL                  | Sm. Muscle     | BSS01606 | BRAIN VASCULATURE SMOOTH MUSCLE CELL |
| Cancer    | BSS01888 | PROSTATE EPITHELIAL CARCINOMA      | HSC & B-cell | BSS01353 | NK CELL                     | Sm. Muscle     | BSS01285 | COLON MUSCLE                         |
| Cancer    | BSS00001 | PROSTATE EPITHELIAL CARCINOMA      | HSC & B-cell | BSS01355 | NK CELL                     | Sm. Muscle     | BSS01286 | COLON MUSCLE                         |
| Cancer    | BSS00002 | PROSTATE EPITHELIAL CARCINOMA      | HSC & B-cell | BSS01354 | NK CELL                     | Sm. Muscle     | BSS01288 | DUODENUM MUSCLE                      |
| Cancer    | BSS00709 | FIBROSARCOMA                       | iPSC         | BSS00742 | iPSC                        | Sm. Muscle     | BSS01287 | DUODENUM MUSCLE                      |
| Digestive | BSS00227 | COLON MUCOSA                       | iPSC         | BSS00735 | iPSC                        | Sm. Muscle     | BSS01475 | RECTUM MUSCLE                        |
| Digestive | BSS00228 | COLON MUCOSA                       | iPSC         | BSS00741 | iPSC                        | Sm. Muscle     | BSS01660 | STOMACH MUSCLE                       |
| Digestive | BSS00271 | DUODENUM MUCOSA                    | iPSC         | BSS00732 | iPSC                        | Sm. Muscle     | BSS01659 | STOMACH MUSCLE                       |
| Digestive | BSS00270 | DUODENUM MUCOSA                    | iPSC         | BSS00733 | iPSC                        | Spleen         | BSS01625 | SPLEEN                               |
| Digestive | BSS00316 | ESOPHAGUS                          | iPSC         | BSS00244 | iPSC                        | Spleen         | BSS01628 | SPLEEN                               |
| Digestive | BSS00318 | ESOPHAGUS                          | iPSC         | BSS01107 | iPSC                        | Spleen         | BSS01629 | SPLEEN                               |
| Digestive | BSS00323 | ESOPHAGUS MUSCULARIS MUCOSA        | iPSC         | BSS01108 | iPSC                        | Spleen         | BSS01633 | SPLEEN                               |
| Digestive | BSS00322 | ESOPHAGUS MUSCULARIS MUCOSA        | iPSC         | BSS00738 | iPSC                        | Spleen         | BSS01634 | SPLEEN                               |
| Digestive | BSS00321 | ESOPHAGUS MUSCULARIS MUCOSA        | iPSC         | BSS00736 | iPSC                        | Spleen         | BSS01631 | SPLEEN                               |
| Digestive | BSS00324 | ESOPHAGUS SQUAMOUS EPITHELIUM      | iPSC         | BSS00737 | iPSC                        | Spleen         | BSS01630 | SPLEEN                               |
| Digestive | BSS00326 | ESOPHAGUS SQUAMOUS EPITHELIUM      | iPSC         | BSS00739 | iPSC                        | Stromal        | BSS01661 | BONE MARROW STROMAL CELL             |
| Digestive | BSS00325 | ESOPHAGUS SQUAMOUS EPITHELIUM      | iPSC         | BSS00731 | iPSC                        | Stromal        | BSS00144 | PERICYTE                             |
| Digestive | BSS00380 | GASTROESOPHAGEAL SPHINCTER         | iPSC         | BSS00734 | iPSC                        | Stromal        | BSS00349 | CONJUNCTIVA FIBROBLAST               |
| Digestive | BSS00381 | GASTROESOPHAGEAL SPHINCTER         | iPSC         | BSS00477 | iPSC                        | Stromal        | BSS00347 | AORTA FIBROBLAST                     |
| Digestive | BSS01116 | LARGE INTESTINE                    | Kidney       | BSS01091 | KIDNEY                      | Stromal        | BSS0168  | CARDIAC FIBROBLAST                   |
| Digestive | BSS01117 | LARGE INTESTINE                    | Kidney       | BSS01132 | KIDNEY                      | Stromal        | BSS00166 | CARDIAC FIBROBLAST                   |
| Digestive | BSS01109 | LARGE INTESTINE                    | Kidney       | BSS01512 | KIDNEY                      | Stromal        | BSS00167 | CARDIAC FIBROBLAST                   |
| Digestive | BSS01110 | LARGE INTESTINE                    | Kidney       | BSS01133 | KIDNEY                      | Stromal        | BSS00064 | LUNG FIBROBLAST                      |
| Digestive | BSS01111 | LARGE INTESTINE                    | Kidney       | BSS01513 | KIDNEY                      | Stromal        | BSS01891 | LUNG FIBROBLAST                      |
| Digestive | BSS01112 | LARGE INTESTINE                    | Kidney       | BSS01084 | KIDNEY                      | Stromal        | BSS00342 | LUNG FIBROBLAST                      |
| Digestive | BSS01113 | LARGE INTESTINE                    | Kidney       | BSS01128 | KIDNEY                      | Stromal        | BSS00339 | LUNG FIBROBLAST                      |
| Digestive | BSS01114 | LARGE INTESTINE                    | Kidney       | BSS01509 | KIDNEY                      | Stromal        | BSS00662 | LUNG FIBROBLAST                      |
| Digestive | BSS01122 | LARGE INTESTINE                    | Kidney       | BSS01085 | KIDNEY                      | Stromal        | BSS00341 | LUNG FIBROBLAST                      |
| Digestive | BSS01118 | LARGE INTESTINE                    | Kidney       | BSS01129 | KIDNEY                      | Stromal        | BSS00720 | LUNG FIBROBLAST                      |
| Digestive | BSS01120 | LARGE INTESTINE                    | Kidney       | BSS01086 | KIDNEY                      | Stromal        | BSS00345 | PULMONARY ARTERY FIBROBLAST          |
| Digestive | BSS01121 | LARGE INTESTINE                    | Kidney       | BSS01510 | KIDNEY                      | Stromal        | BSS00338 | GINGIVAL FIBROBLAST                  |
| Digestive | BSS01119 | LARGE INTESTINE                    | Kidney       | BSS01089 | KIDNEY                      | Stromal        | BSS00667 | GINGIVAL FIBROBLAST                  |
| Digestive | BSS01427 | PEYERS PATCH                       | Kidney       | BSS01130 | KIDNEY                      | Stromal        | BSS00344 | PERIDONTAL LIGAMENT FIBROBLAST       |
| Digestive | BSS01428 | PEYERS PATCH                       | Kidney       | BSS01511 | KIDNEY                      | Stromal        | BSS00350 | VILLOUS MESENCHYME FIBROBLAST        |
| Digestive | BSS01426 | PEYERS PATCH                       | Kidney       | BSS01090 | KIDNEY                      | Stromal        | BSS00332 | BREAST FIBROBLAST                    |
| Digestive | BSS01282 | RECTUM MUCOSA                      | Kidney       | BSS01078 | KIDNEY                      | Stromal        | BSS00333 | BREAST FIBROBLAST                    |
| Digestive | BSS01283 | RECTUM MUCOSA                      | Kidney       | BSS01100 | KIDNEY                      | Stromal        | BSS00335 | DERMIS FIBROBLAST                    |
| Digestive | BSS01542 | SIGMOID COLON                      | Kidney       | BSS01101 | KIDNEY                      | Stromal        | BSS00334 | DERMIS FIBROBLAST                    |
| Digestive | BSS01546 | SIGMOID COLON                      | Kidney       | BSS01135 | KIDNEY                      | Stromal        | BSS00337 | DERMIS FIBROBLAST                    |
| Digestive | BSS01547 | SIGMOID COLON                      | Kidney       | BSS01516 | KIDNEY                      | Stromal        | BSS00697 | FORESKIN FIBROBLAST                  |

Figure S1: (continued, 3 of 4)



| Group | BSSID     | Extended Info | Group           | BSSID | Extended Info | Group    | BSSID                     | Extended Info |         |          |                     |
|-------|-----------|---------------|-----------------|-------|---------------|----------|---------------------------|---------------|---------|----------|---------------------|
| 254   | Digestive | BSS01548      | SIGMOID COLON   | 541   | Kidney        | BSS01517 | KIDNEY                    | 828           | Stromal | BSS00353 | FORESKIN FIBROBLAST |
| 255   | Digestive | BSS01545      | SIGMOID COLON   | 542   | Kidney        | BSS01136 | KIDNEY                    | 829           | Stromal | BSS00343 | MAMMARY FIBROBLAST  |
| 256   | Digestive | BSS01543      | SIGMOID COLON   | 543   | Kidney        | BSS01518 | KIDNEY                    | 830           | Stromal | BSS00275 | SKIN FIBROBLAST     |
| 257   | Digestive | BSS01595      | SMALL INTESTINE | 544   | Kidney        | BSS01099 | KIDNEY                    | 831           | Stromal | BSS00276 | SKIN FIBROBLAST     |
| 258   | Digestive | BSS01596      | SMALL INTESTINE | 545   | Kidney        | BSS01514 | KIDNEY                    | 832           | Stromal | BSS00393 | SKIN FIBROBLAST     |
| 259   | Digestive | BSS01590      | SMALL INTESTINE | 546   | Kidney        | BSS01134 | KIDNEY                    | 833           | Stromal | BSS00394 | SKIN FIBROBLAST     |
| 260   | Digestive | BSS01591      | SMALL INTESTINE | 547   | Kidney        | BSS01515 | KIDNEY                    | 834           | Stromal | BSS00063 | SKIN FIBROBLAST     |
| 261   | Digestive | BSS01592      | SMALL INTESTINE | 548   | Kidney        | BSS01131 | KIDNEY                    | 835           | Stromal | BSS00069 | SKIN FIBROBLAST     |
| 262   | Digestive | BSS01593      | SMALL INTESTINE | 549   | Kidney        | BSS01079 | KIDNEY                    | 836           | Stromal | BSS00346 | SKIN FIBROBLAST     |
| 263   | Digestive | BSS01594      | SMALL INTESTINE | 550   | Kidney        | BSS01096 | KIDNEY                    | 837           | Stromal | BSS01583 | SKIN FIBROBLAST     |
| 264   | Digestive | BSS01603      | SMALL INTESTINE | 551   | Kidney        | BSS01097 | KIDNEY                    | 838           | Stromal | BSS00278 | SKIN FIBROBLAST     |
| 265   | Digestive | BSS01604      | SMALL INTESTINE | 552   | Kidney        | BSS01088 | KIDNEY                    | 839           | Stromal | BSS00390 | SKIN FIBROBLAST     |
| 266   | Digestive | BSS01600      | SMALL INTESTINE | 553   | Kidney        | BSS00528 | KIDNEY CELL               | 840           | Stromal | BSS00066 | SKIN FIBROBLAST     |
| 267   | Digestive | BSS01602      | SMALL INTESTINE | 554   | Kidney        | BSS00526 | KIDNEY CELL               | 841           | Stromal | BSS00061 | SKIN FIBROBLAST     |
| 268   | Digestive | BSS01597      | SMALL INTESTINE | 555   | Kidney        | BSS01484 | RENAL CORTEX INTERSTITIUM | 842           | Stromal | BSS00068 | SKIN FIBROBLAST     |
| 269   | Digestive | BSS01599      | SMALL INTESTINE | 556   | Kidney        | BSS01485 | RENAL CORTEX INTERSTITIUM | 843           | Stromal | BSS00476 | SKIN FIBROBLAST     |
| 270   | Digestive | BSS01588      | SMALL INTESTINE | 557   | Kidney        | BSS01482 | RENAL CORTEX INTERSTITIUM | 844           | Stromal | BSS00113 | SKIN FIBROBLAST     |
| 271   | Digestive | BSS01601      | SMALL INTESTINE | 558   | Kidney        | BSS01483 | RENAL CORTEX INTERSTITIUM | 845           | Thymus  | BSS01824 | THYMUS              |
| 272   | Digestive | BSS01637      | STOMACH         | 559   | Kidney        | BSS01489 | RENAL CORTEX INTERSTITIUM | 846           | Thymus  | BSS01819 | THYMUS              |
| 273   | Digestive | BSS01642      | STOMACH         | 560   | Kidney        | BSS01490 | RENAL CORTEX INTERSTITIUM | 847           | Thymus  | BSS01821 | THYMUS              |
| 274   | Digestive | BSS01643      | STOMACH         | 561   | Kidney        | BSS01150 | RENAL CORTEX INTERSTITIUM | 848           | Thymus  | BSS01823 | THYMUS              |
| 275   | Digestive | BSS01644      | STOMACH         | 562   | Kidney        | BSS01531 | RENAL CORTEX INTERSTITIUM | 849           | Thymus  | BSS01818 | THYMUS              |
| 276   | Digestive | BSS01646      | STOMACH         | 563   | Kidney        | BSS01486 | RENAL CORTEX INTERSTITIUM | 850           | Thymus  | BSS01826 | THYMUS              |
| 277   | Digestive | BSS01647      | STOMACH         | 564   | Kidney        | BSS01487 | RENAL CORTEX INTERSTITIUM | 851           | Thymus  | BSS01827 | THYMUS              |
| 278   | Digestive | BSS01641      | STOMACH         | 565   | Kidney        | BSS01151 | RENAL CORTEX INTERSTITIUM | 852           | Thymus  | BSS01828 | THYMUS              |
| 279   | Digestive | BSS01658      | STOMACH         | 566   | Kidney        | BSS01532 | RENAL CORTEX INTERSTITIUM | 853           | Thymus  | BSS01829 | THYMUS              |
| 280   | Digestive | BSS01655      | STOMACH         | 567   | Kidney        | BSS01488 | RENAL CORTEX INTERSTITIUM | 854           | Thymus  | BSS01820 | THYMUS              |
| 281   | Digestive | BSS01656      | STOMACH         | 568   | Kidney        | BSS01495 | RENAL PELVIS              | 855           | Thymus  | BSS01825 | THYMUS              |
| 282   | Digestive | BSS01657      | STOMACH         | 569   | Kidney        | BSS01496 | RENAL PELVIS              | 856           | Urinary | BSS01878 | URINARY BLADDER     |
| 283   | Digestive | BSS01636      | STOMACH         | 570   | Kidney        | BSS01493 | RENAL PELVIS              | 857           | Urinary | BSS01876 | URINARY BLADDER     |
| 284   | Digestive | BSS01638      | STOMACH         | 571   | Kidney        | BSS01494 | RENAL PELVIS              | 858           | Urinary | BSS01879 | UROTHELIUM CELL     |
| 285   | Digestive | BSS01650      | STOMACH         | 572   | Kidney        | BSS01500 | RENAL PELVIS              | 859           | Urinary | BSS01880 | UROTHELIUM CELL     |
| 286   | Digestive | BSS01653      | STOMACH         | 573   | Kidney        | BSS01501 | RENAL PELVIS              |               |         |          |                     |
| 287   | Digestive | BSS01649      | STOMACH         | 574   | Kidney        | BSS01152 | RENAL PELVIS              |               |         |          |                     |

Figure S1: (continued, 4 of 4)

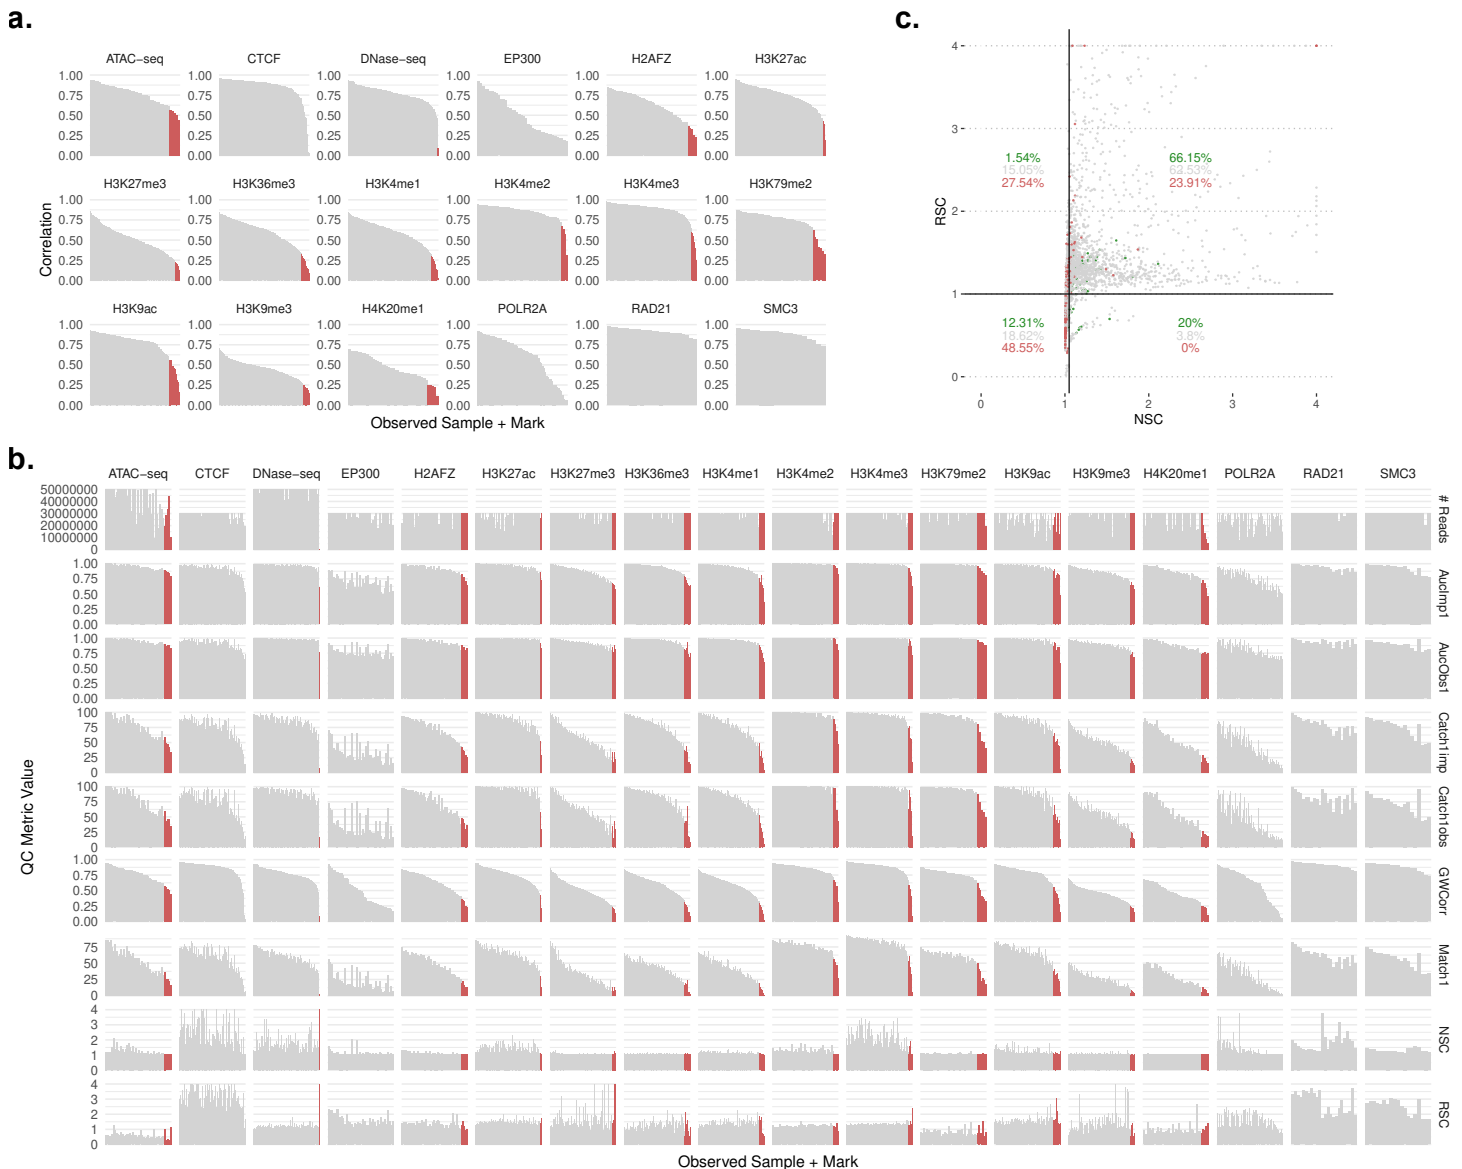

**Figure S2: a.** Track agreement between observed and imputed in the Tier 1 marks, where both are available, by genome wide correlation. Top (green) and bottom (red) tracks are labeled according to automated elbow discovery in the ranked list. **b.** All imputation metrics (from original ChromImpute paper: correlation, AUC, and peak recovery) and QC metrics (reads, NSC, RSC) across all 18 imputed Tier 1,2, and 3 assays, ordered according to correlation between imputed and observed within each assay. Bottom tracks for Tier 1 and 2 assays are labeled in red, as above. **c.** Imputation QC metrics reflect external ChIP-seq quality metrics (NSC and RSC). Normalized Strand Cross-correlation coefficient (NSC) against Relative Strand Cross-correlation coefficient (RSC) for observed tracks. Top (green) and bottom (red) tracks are labeled according to automated elbow discovery in imputed vs. observed correlation ranked list. Poor agreement tracks are strongly clustered in lower left quadrant of tracks failing QC. Critical values subdivide the plot for NSC (1.05) and RSC (1).

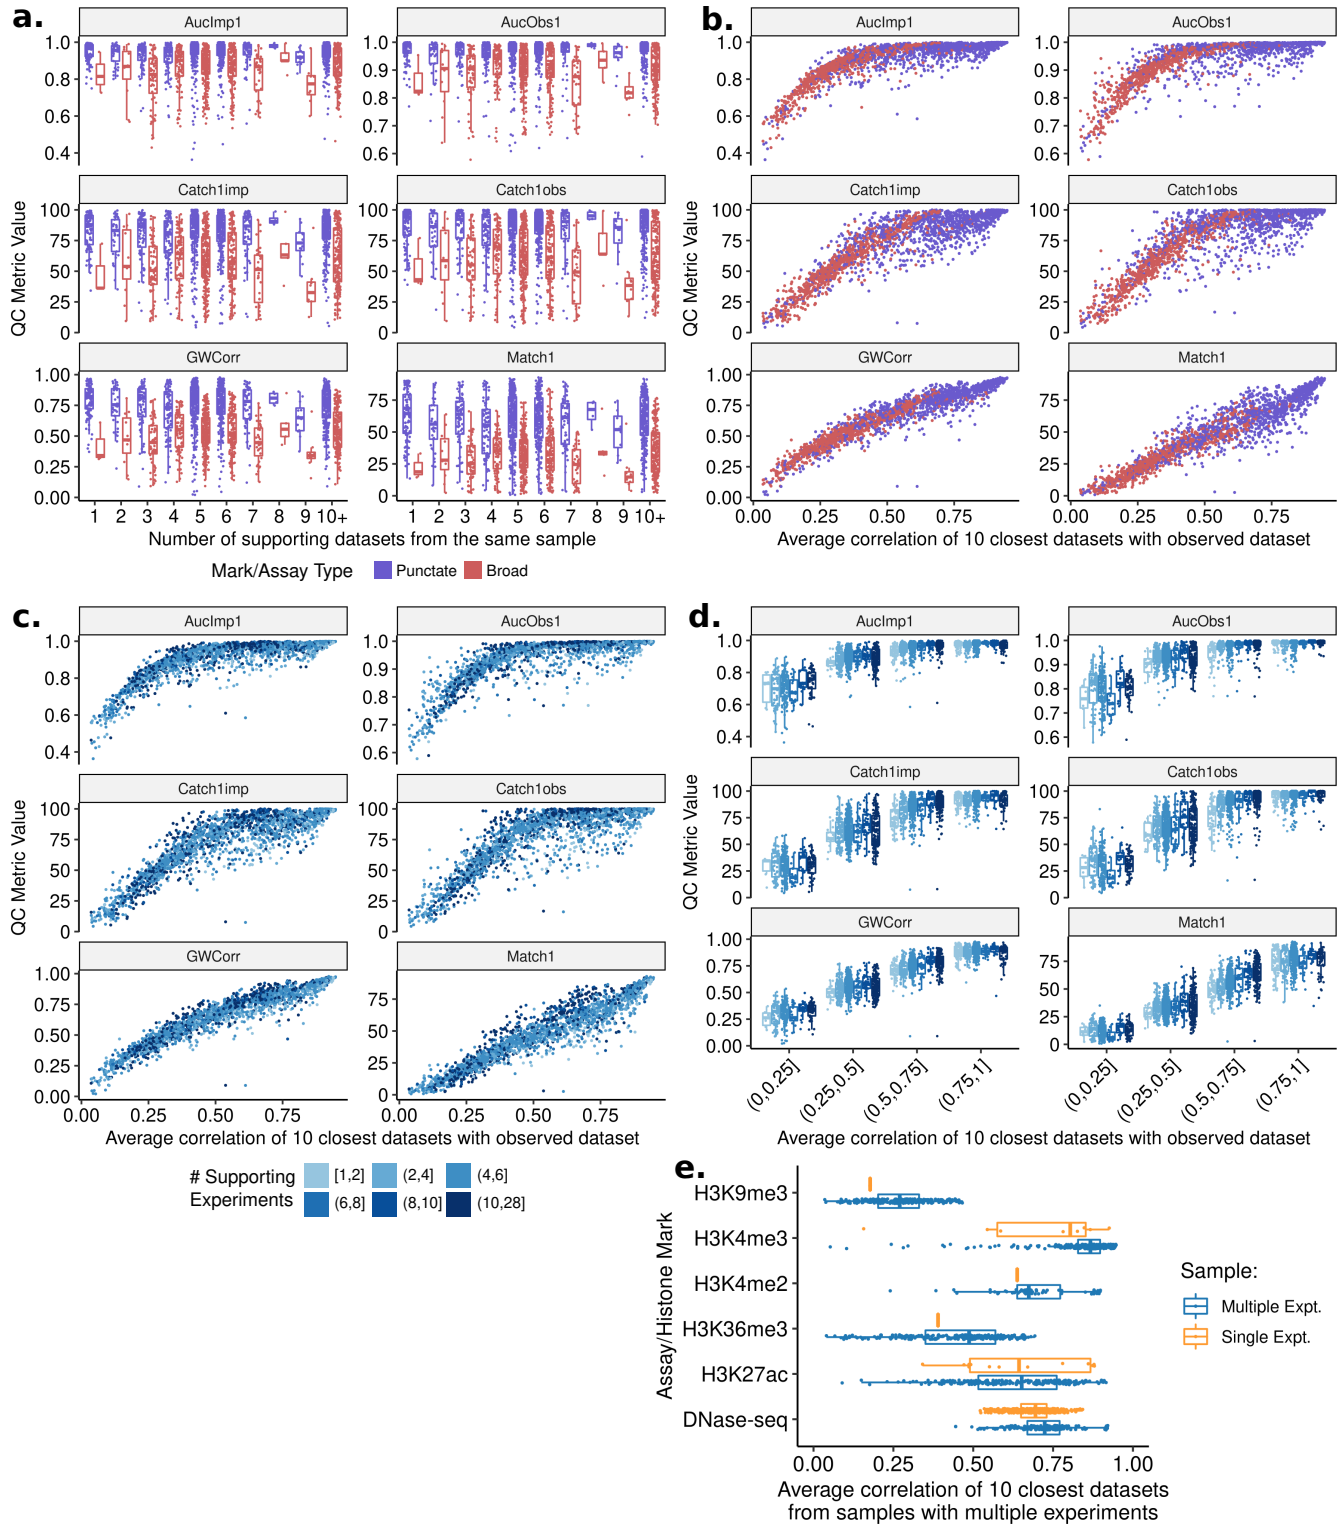

**Figure S3: Imputation quality by level of sample-internal and sample-external support. a.** Imputation QC metrics in punctate (blue) and broad (red) marks by number of other supporting datasets from the same sample (sample-internal support). **b.** Imputation QC metrics for punctate and broad marks against the average correlation of the 10 closest datasets with the observed dataset. (sample-external support). **c-d.** Metrics against continuous (**c**) and quartiles of (**d**) sample-external support, colored by level of sample-internal support, showing that imputation metrics are dominated by the level of sample-external support. **e.** Level of sample-external support from samples with multiple experiments for samples with only one experiment (orange) or samples with multiple experiments (blue), by available mark or assay. Almost all samples with only DNase-seq have strong cross-sample support from other samples with multiple experiments (average correlation of nearest samples above 50

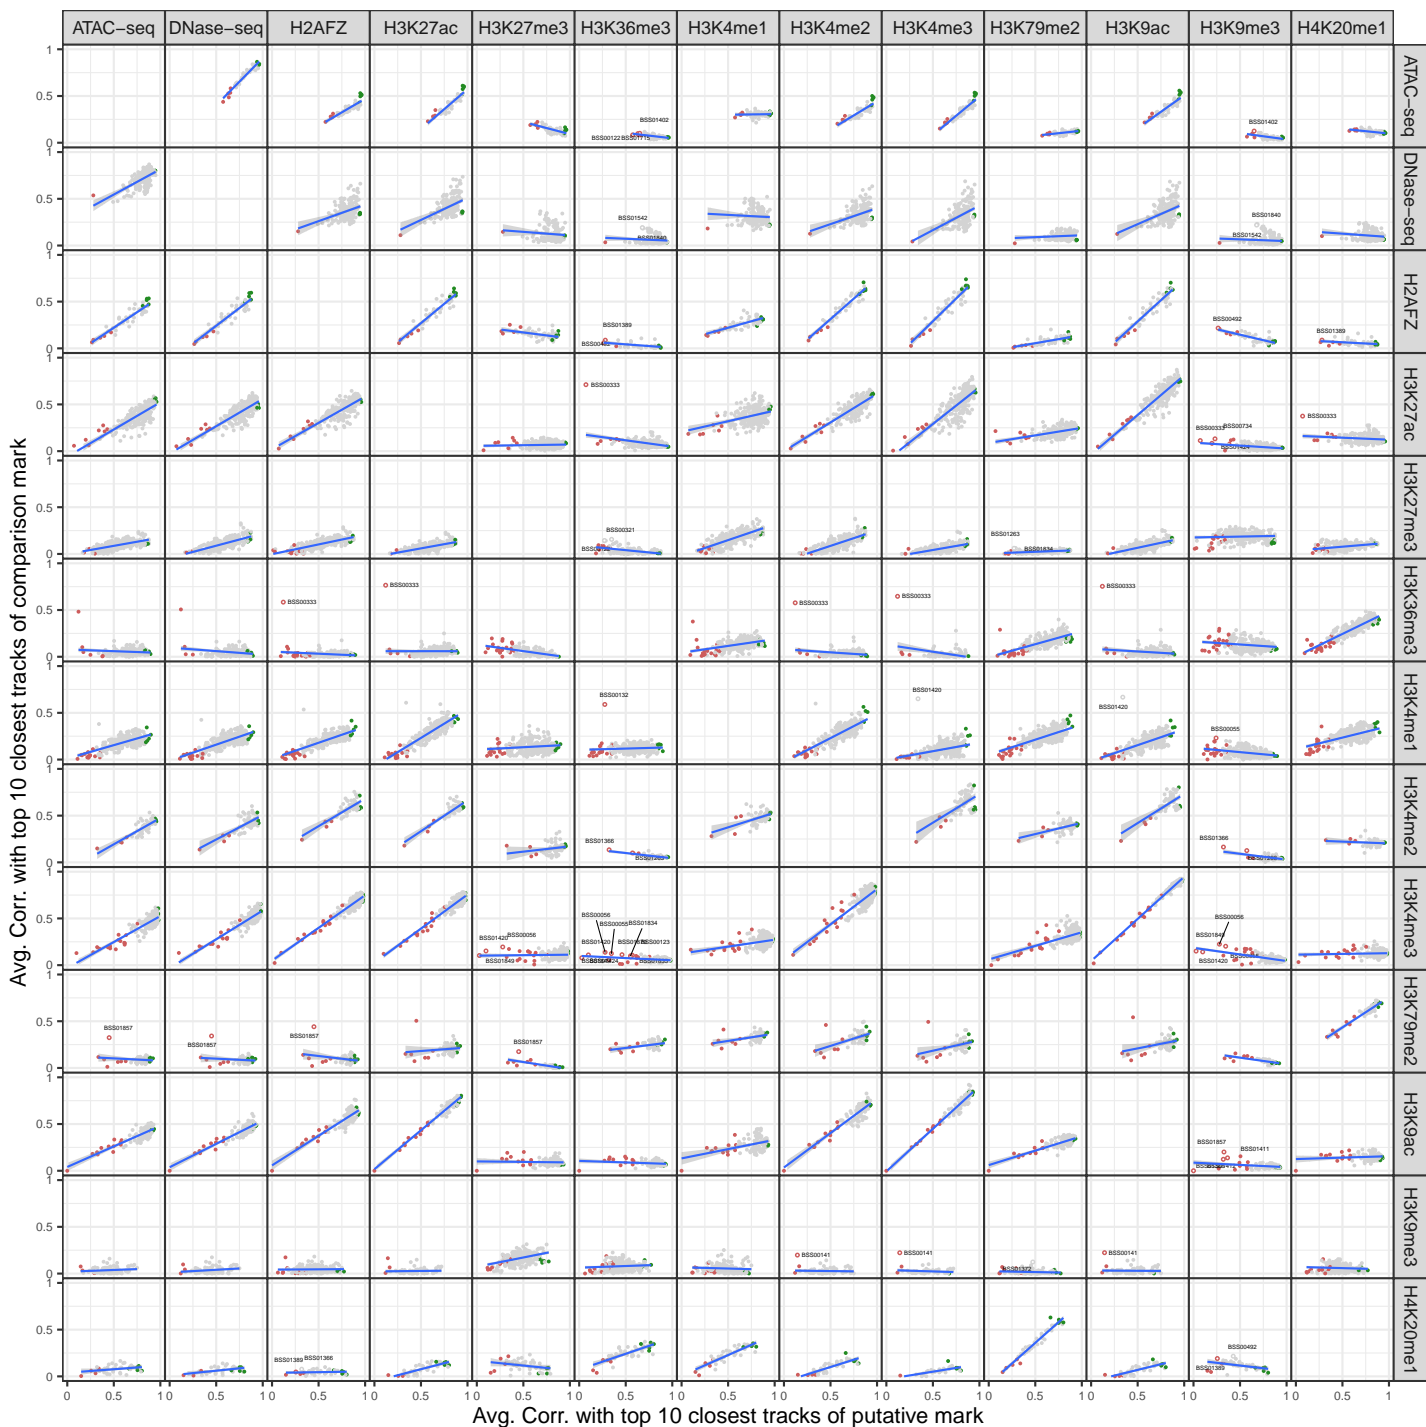

**Figure S4:** Imputed-observed agreement can be used to systematically flag antibody swaps. Each panel shows the average correlation with closest 10 tracks within the putative mark (each row) for each observed dataset against all other Tier 1 and 2 marks and assays. We used the overall mark-mark trend to flag outliers for visual inspection.

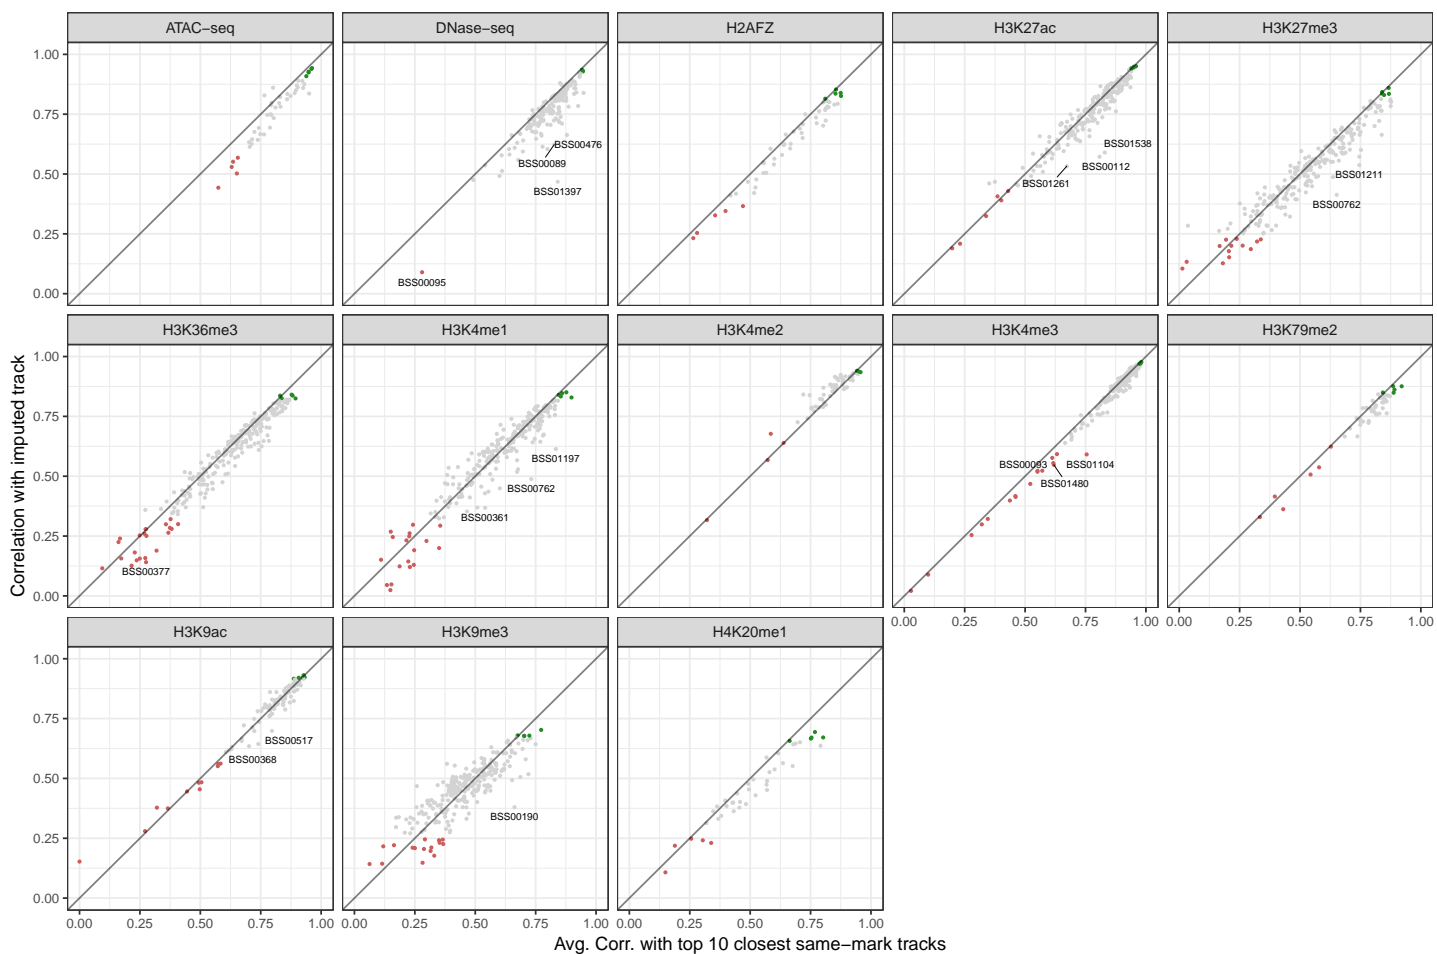

**Figure S5:** Imputed-observed agreement can be used to flag sample swaps. We compare the imputed-observed correlation to the average imputed-observed correlation within the top 10 closest samples for the putative mark and flagged outliers for visual inspection (after removing antibody swaps).





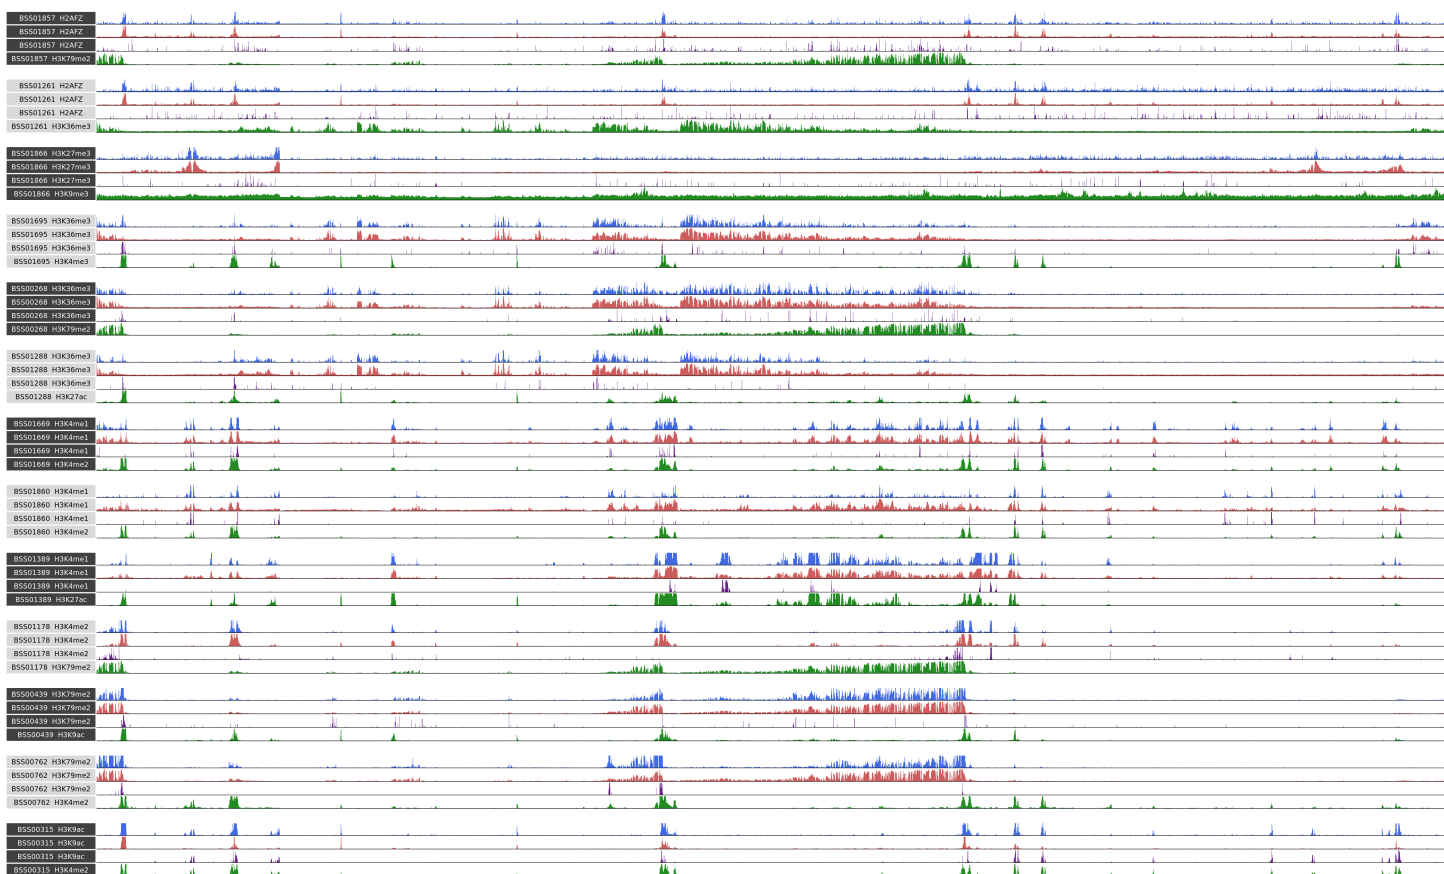

**Figure S7:** We can use imputation to identify antibodies with secondary reactivities. Track sets for 13 flagged samples highlight a disagreement from secondary reactivity (or sample swapping of one experiment out of multiple replicates), where the difference between observed and imputed best correlate with an external histone mark or assay. Each track set shows the Difference (purple) from Observed (blue) to Imputed (red) and the best Match (green) to the difference (a mark in the same sample) in chromosome 1 from 1.5Mb to 2Mb (chosen to show a range of diverse elements and marks).

| <b>(low quality tracks)</b> |          |          |    |          |          | <b>potential.abswap</b> |          |           |
|-----------------------------|----------|----------|----|----------|----------|-------------------------|----------|-----------|
| id                          | mark     |          |    |          |          | id                      | mark     |           |
| 1                           | BSS01365 | H3K4me2  | 47 | BSS01857 | H3K9ac   | 93                      | BSS00734 | H3K27ac   |
| 2                           | BSS01104 | H3K4me2  | 48 | BSS01832 | H3K36me3 | 94                      | BSS01715 | H3K9me3   |
| 3                           | BSS01365 | H3K79me2 | 49 | BSS01841 | H3K36me3 | 95                      | BSS00325 | H3K9me3   |
| 4                           | BSS00556 | H3K4me3  | 50 | BSS01424 | H3K4me3  | 96                      | BSS01850 | H3K27me3  |
| 5                           | BSS01104 | H3K4me3  | 51 | BSS00055 | H3K4me1  | 97                      | BSS01407 | H3K27me3  |
| 6                           | BSS01263 | H3K4me3  | 52 | BSS00087 | H3K4me1  | 98                      | BSS00381 | H3K4me1   |
| 7                           | BSS01815 | ATAC-seq | 53 | BSS00080 | H3K4me1  | 99                      | BSS00395 | H3K27me3  |
| 8                           | BSS01263 | H3K4me2  | 54 | BSS00325 | H3K36me3 | 100                     | BSS00381 | H3K9me3   |
| 9                           | BSS01475 | H3K9ac   | 55 | BSS00556 | H3K36me3 | 101                     | BSS00321 | H3K4me1   |
| 10                          | BSS01196 | H3K9ac   | 56 | BSS01340 | H3K9ac   | 102                     | BSS01424 | H3K27ac   |
| 11                          | BSS00093 | H3K4me3  | 57 | BSS00284 | H3K36me3 | 103                     | BSS00124 | H3K36me3  |
| 12                          | BSS01506 | ATAC-seq | 58 | BSS00055 | H3K36me3 | 104                     | BSS01507 | H3K27me3  |
| 13                          | BSS01667 | H3K9ac   | 59 | BSS00281 | H3K4me1  | 105                     | BSS01715 | H3K36me3  |
| 14                          | BSS01480 | H3K4me3  | 60 | BSS01543 | H3K36me3 | 106                     | BSS01209 | H3K27me3  |
| 15                          | BSS00484 | H3K79me2 | 61 | BSS01835 | H3K4me1  | 107                     | BSS01832 | H3K9me3   |
| 16                          | BSS01715 | ATAC-seq | 62 | BSS01080 | H3K36me3 | 108                     | BSS01850 | H3K36me3  |
| 17                          | BSS00123 | H3K4me3  | 63 | BSS00056 | H3K4me3  | 109                     | BSS01411 | H3K36me3  |
| 18                          | BSS01834 | H3K4me3  | 64 | BSS01389 | H2AFZ    | 110                     | BSS01370 | H3K36me3  |
| 19                          | BSS01835 | H3K4me3  | 65 | BSS00493 | H3K36me3 | 111                     | BSS01366 | H3K9ac    |
| 20                          | BSS01366 | H3K79me2 | 66 | BSS01835 | H3K36me3 | 112                     | BSS01870 | H3K27me3  |
| 21                          | BSS01402 | ATAC-seq | 67 | BSS00284 | H3K4me1  | 113                     | BSS01834 | H3K4me1   |
| 22                          | BSS01371 | H3K9ac   | 68 | BSS01389 | H4K20me1 | 114                     | BSS01887 | H3K36me3  |
| 23                          | BSS01370 | H3K9ac   | 69 | BSS00054 | H3K4me1  | 115                     | BSS01831 | H3K9me3   |
| 24                          | BSS00284 | H3K4me3  | 70 | BSS00122 | H3K9me3  | 116                     | BSS01630 | H3K4me1   |
| 25                          | BSS00197 | H3K9ac   | 71 | BSS00123 | H3K9me3  | 117                     | BSS01459 | H3K9me3   |
| 26                          | BSS01341 | H3K9ac   | 72 | BSS01850 | H3K9me3  | 118                     | BSS01424 | H3K9me3   |
| 27                          | BSS00122 | ATAC-seq | 73 | BSS01213 | H4K20me1 | 119                     | BSS00377 | H3K36me3  |
| 28                          | BSS00055 | H3K27ac  | 74 | BSS00093 | H3K36me3 | 120                     | BSS00159 | H3K27me3  |
| 29                          | BSS01870 | H3K4me3  | 75 | BSS00132 | H3K4me1  | 121                     | BSS01507 | H3K4me1   |
| 30                          | BSS01412 | H3K79me2 | 76 | BSS00492 | H2AFZ    | 122                     | BSS01837 | H3K27me3  |
| 31                          | BSS00141 | H3K4me3  | 77 | BSS01876 | H3K4me1  | 123                     | BSS01426 | H3K36me3  |
| 32                          | BSS00074 | H3K27ac  | 78 | BSS01370 | H3K9me3  | 124                     | BSS01837 | H3K4me1   |
| 33                          | BSS00521 | H3K4me3  | 79 | BSS00439 | H4K20me1 | 125                     | BSS01426 | H3K4me1   |
| 34                          | BSS01857 | H3K79me2 | 80 | BSS00325 | H3K4me1  | 126                     | BSS01459 | H3K36me3  |
| 35                          | BSS01866 | H3K27ac  | 81 | BSS01178 | H3K27me3 | 127                     | BSS00484 | H4K20me1  |
| 36                          | BSS01412 | H3K9ac   | 82 | BSS00141 | H3K9me3  | 128                     | BSS00531 | H3K27me3  |
| 37                          | BSS01411 | H3K9ac   | 83 | BSS01849 | H3K27me3 | 129                     | BSS00333 | H3K36me3  |
| 38                          | BSS00478 | H2AFZ    | 84 | BSS01543 | H3K9me3  | 130                     | BSS00093 | H3K27me3  |
| 39                          | BSS00556 | H3K79me2 | 85 | BSS00284 | H3K27me3 | 131                     | BSS01562 | DNase-seq |
| 40                          | BSS00558 | H2AFZ    | 86 | BSS00054 | H3K36me3 | 132                     | BSS00095 | DNase-seq |
| 41                          | BSS01411 | H3K79me2 | 87 | BSS00493 | H3K9me3  | 133                     | BSS01420 | H3K4me3   |
| 42                          | BSS00477 | H2AFZ    | 88 | BSS00341 | H4K20me1 | 134                     | BSS00333 | H3K27ac   |
| 43                          | BSS00281 | H3K27ac  | 89 | BSS00325 | H3K27me3 | 135                     | BSS01849 | H3K4me1   |
| 44                          | BSS00055 | H3K4me3  | 90 | BSS00074 | H3K9me3  | 136                     | BSS01519 | H3K4me1   |
| 45                          | BSS00378 | H3K36me3 | 91 | BSS01426 | H3K9me3  | 137                     | BSS01543 | H3K4me1   |
| 46                          | BSS01366 | H3K4me2  | 92 | BSS00483 | H3K9me3  | 138                     | BSS01849 | H3K4me3   |

  

| <b>potential.sampswap</b> |          |           |
|---------------------------|----------|-----------|
| id                        | mark     |           |
| 1                         | BSS00089 | DNase-seq |
| 2                         | BSS00095 | DNase-seq |
| 3                         | BSS00476 | DNase-seq |
| 4                         | BSS01397 | DNase-seq |
| 5                         | BSS00112 | H3K27ac   |
| 6                         | BSS01261 | H3K27ac   |
| 7                         | BSS01538 | H3K27ac   |
| 8                         | BSS00762 | H3K27me3  |
| 9                         | BSS01211 | H3K27me3  |
| 10                        | BSS00377 | H3K36me3  |
| 11                        | BSS00361 | H3K4me1   |
| 12                        | BSS00762 | H3K4me1   |
| 13                        | BSS01197 | H3K4me1   |
| 14                        | BSS00093 | H3K4me3   |
| 15                        | BSS01104 | H3K4me3   |
| 16                        | BSS01480 | H3K4me3   |
| 17                        | BSS00368 | H3K9ac    |
| 18                        | BSS00517 | H3K9ac    |
| 19                        | BSS00190 | H3K9me3   |

  

| <b>potential.secondary</b> |          |          |
|----------------------------|----------|----------|
| id                         | mark     |          |
| 1                          | BSS01857 | H2AFZ    |
| 2                          | BSS01261 | H2AFZ    |
| 3                          | BSS01866 | H3K27me3 |
| 4                          | BSS01695 | H3K36me3 |
| 5                          | BSS00268 | H3K36me3 |
| 6                          | BSS01288 | H3K36me3 |
| 7                          | BSS01669 | H3K4me1  |
| 8                          | BSS01860 | H3K4me1  |
| 9                          | BSS01389 | H3K4me1  |
| 10                         | BSS01178 | H3K4me2  |
| 11                         | BSS00439 | H3K79me2 |
| 12                         | BSS00762 | H3K79me2 |
| 13                         | BSS00315 | H3K9ac   |

**Figure S8:** Table of flagged samples. **(left)** low agreement tracks, **(right, top)** potential antibody swaps, **(right, middle)** potential sample swaps, **(right, bottom)** potential secondary antibody reactivities or single replicate or experiment swaps.

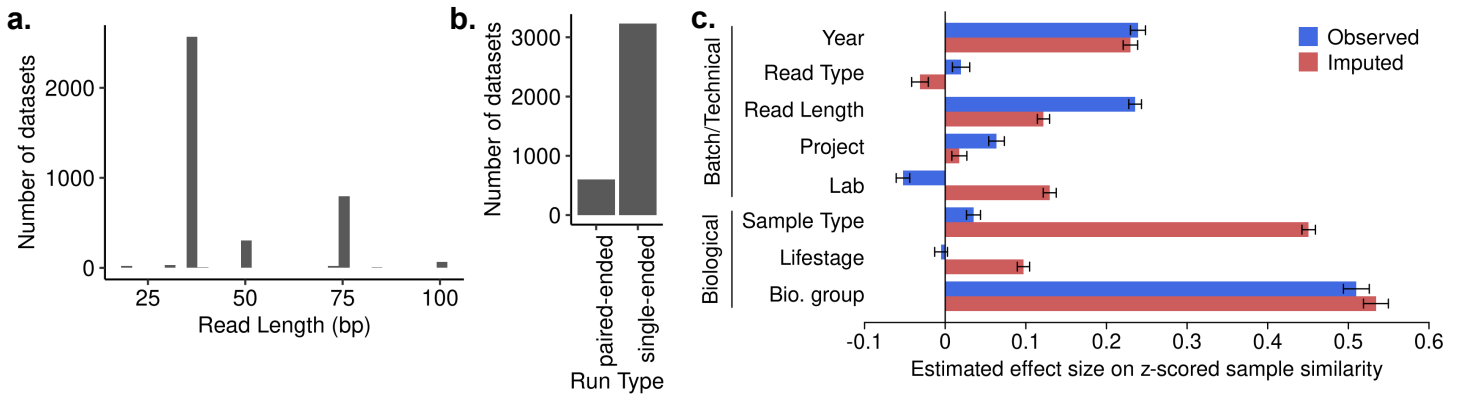

**Figure S9:** **a.** Read length distribution in observed datasets before processing. Over two-thirds of observed datasets have read-length of 36bp or lower. **b.** Distribution of sequencing run type in observed datasets. **c.** Estimated effect sizes of technical and biological covariates on the genome-wide correlation between two imputed or two observed datasets in the same mark. We regressed indicator variables for each covariate against per-mark z-scored correlations of all pair-wise combinations of either observed or imputed datasets in each mark. Imputed datasets show lower effect sizes from all technical covariates except for lab or origin and higher effect sizes for all biological covariates than observed datasets. Error bars represent two standard errors.

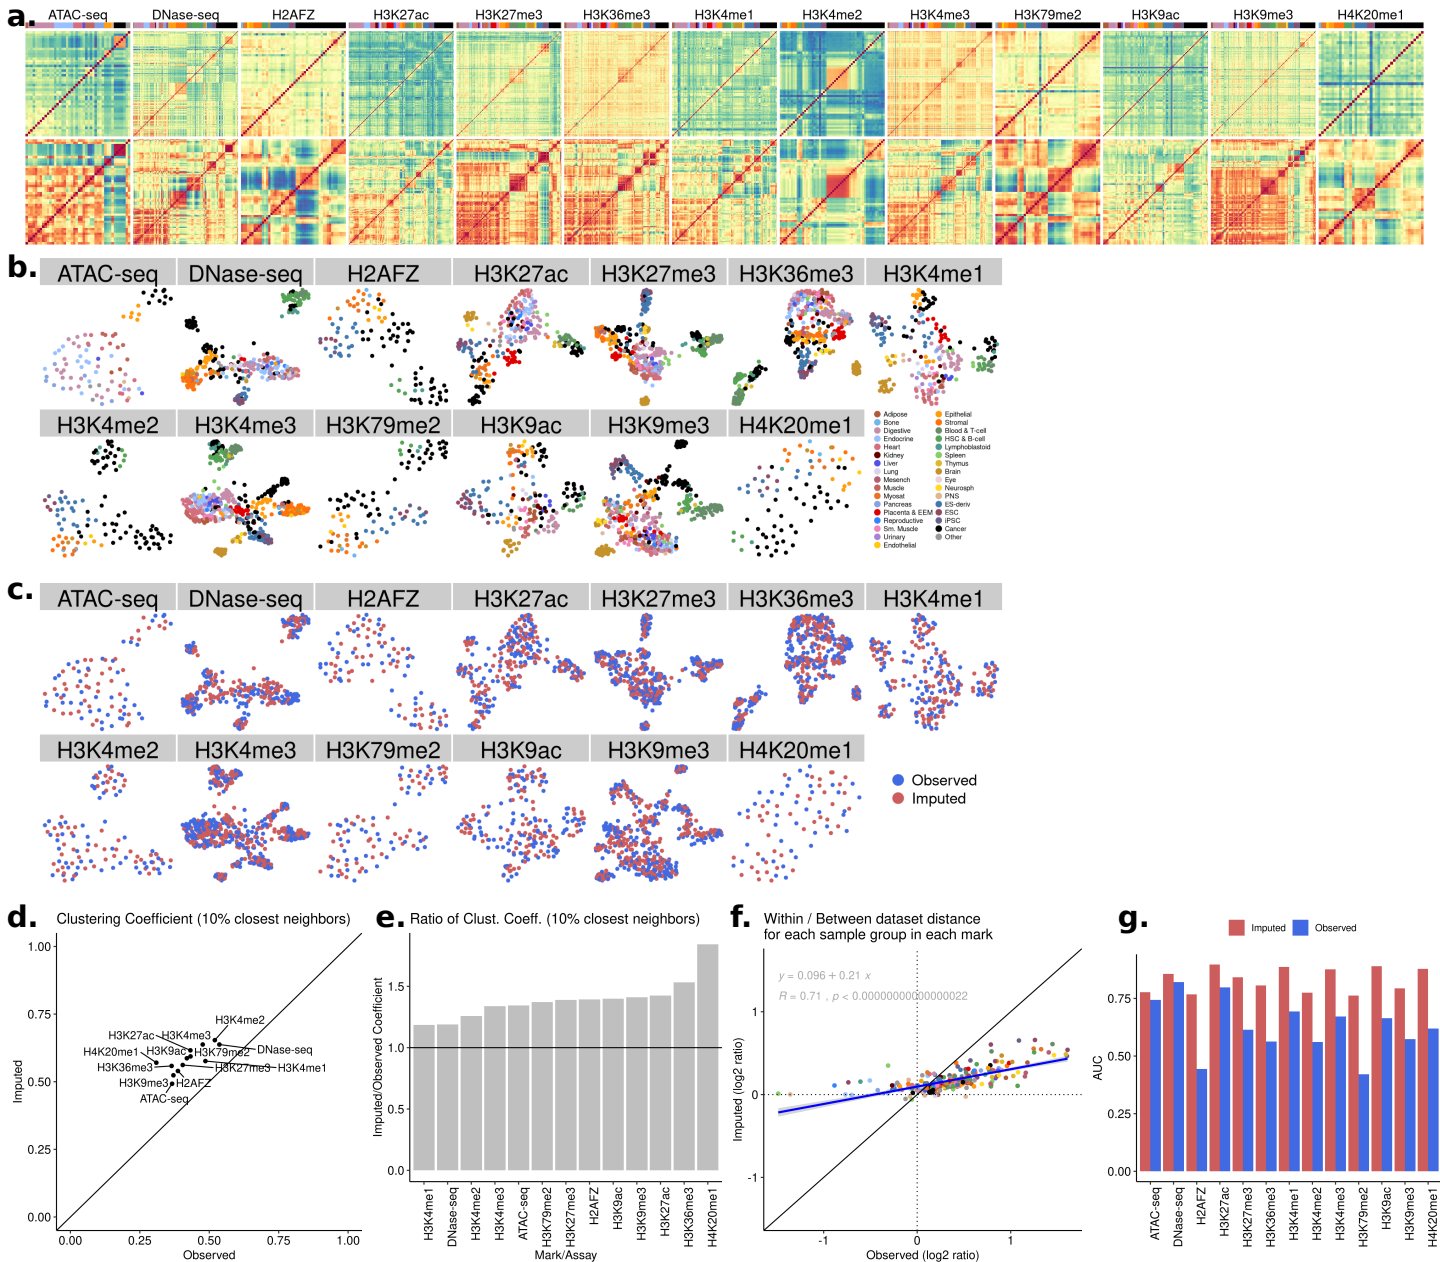

**Figure S10: Data clustering and homogeneity in samples with both observed and imputed data.** **a.** Per-mark heatmap of Spearman correlation for observed (top) and imputed (bottom) data in samples with both observed and imputed data in the mark or assay. **b,c.** Joint imputed and observed per-mark dimensionality reduction (UMAP) from Spearman correlation between all imputed and observed tracks in the subset of samples with both datatypes, colored by **b.** sample group and **c.** datatype. **d.** Per-mark observed versus imputed clustering coefficients. Clustering coefficients were computed on per-mark networks for either observed or imputed datasets constructed by connecting each dataset with its top decile of closest neighbors. **e.** Ratio of imputed to observed clustering coefficients. **f.** Ratio of within-group to between-group distance in observed versus imputed data for each sample group (colors) and each mark. Imputed and observed data show concordant ratios (Pearson  $R = 0.72$ , Spearman  $\rho = 0.71$ ) **g.** AUC for predicting whether a pair of marks is in the same sample group from their pairwise distance. Imputed data outperforms observed data across all marks and assays and achieves  $AUC > 0.75$  for most marks.

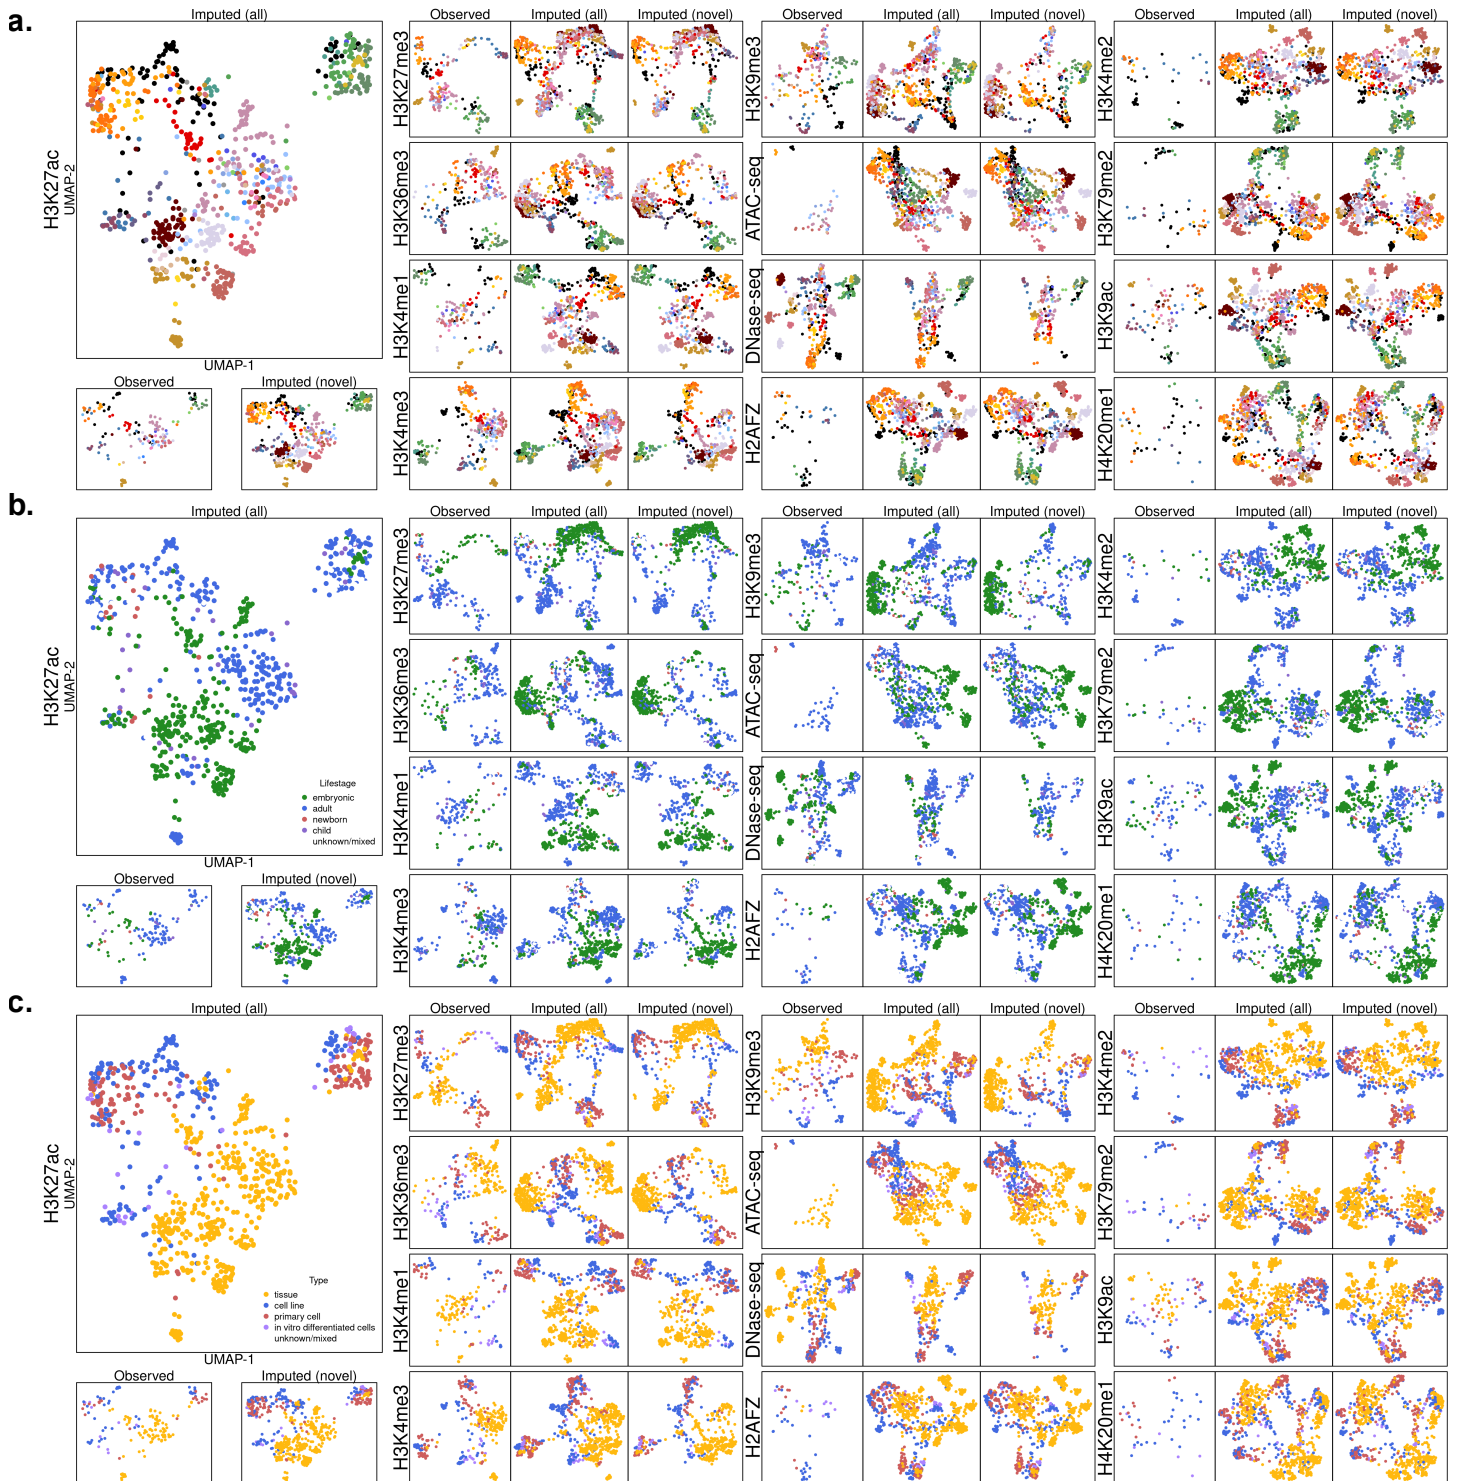

**Figure S11: a-c.** Joint UMAP embeddings of observed and imputed data within each Tier 1 and 2 mark/assay. Separately, observed, imputed samples, and all novel imputed tracks are plotted for each mark/assay and colored according to **a.** tissue group, **b.** biological lifestage, or **d.** sample type. Imputed UMAP highlights differences in cell types: H3K27ac clusters hematopoietic cells and tissues (green in panel a) closely, reflecting lineage, whereas H3K27me3 clusters iPSC, ESCs, and derived cells (purple/blue in panel a), reflecting differentiation stage. UMAP embedding was calculated from spearman correlation of tracks within regions marked by mark or assay relevant states within the Roadmap compendium.



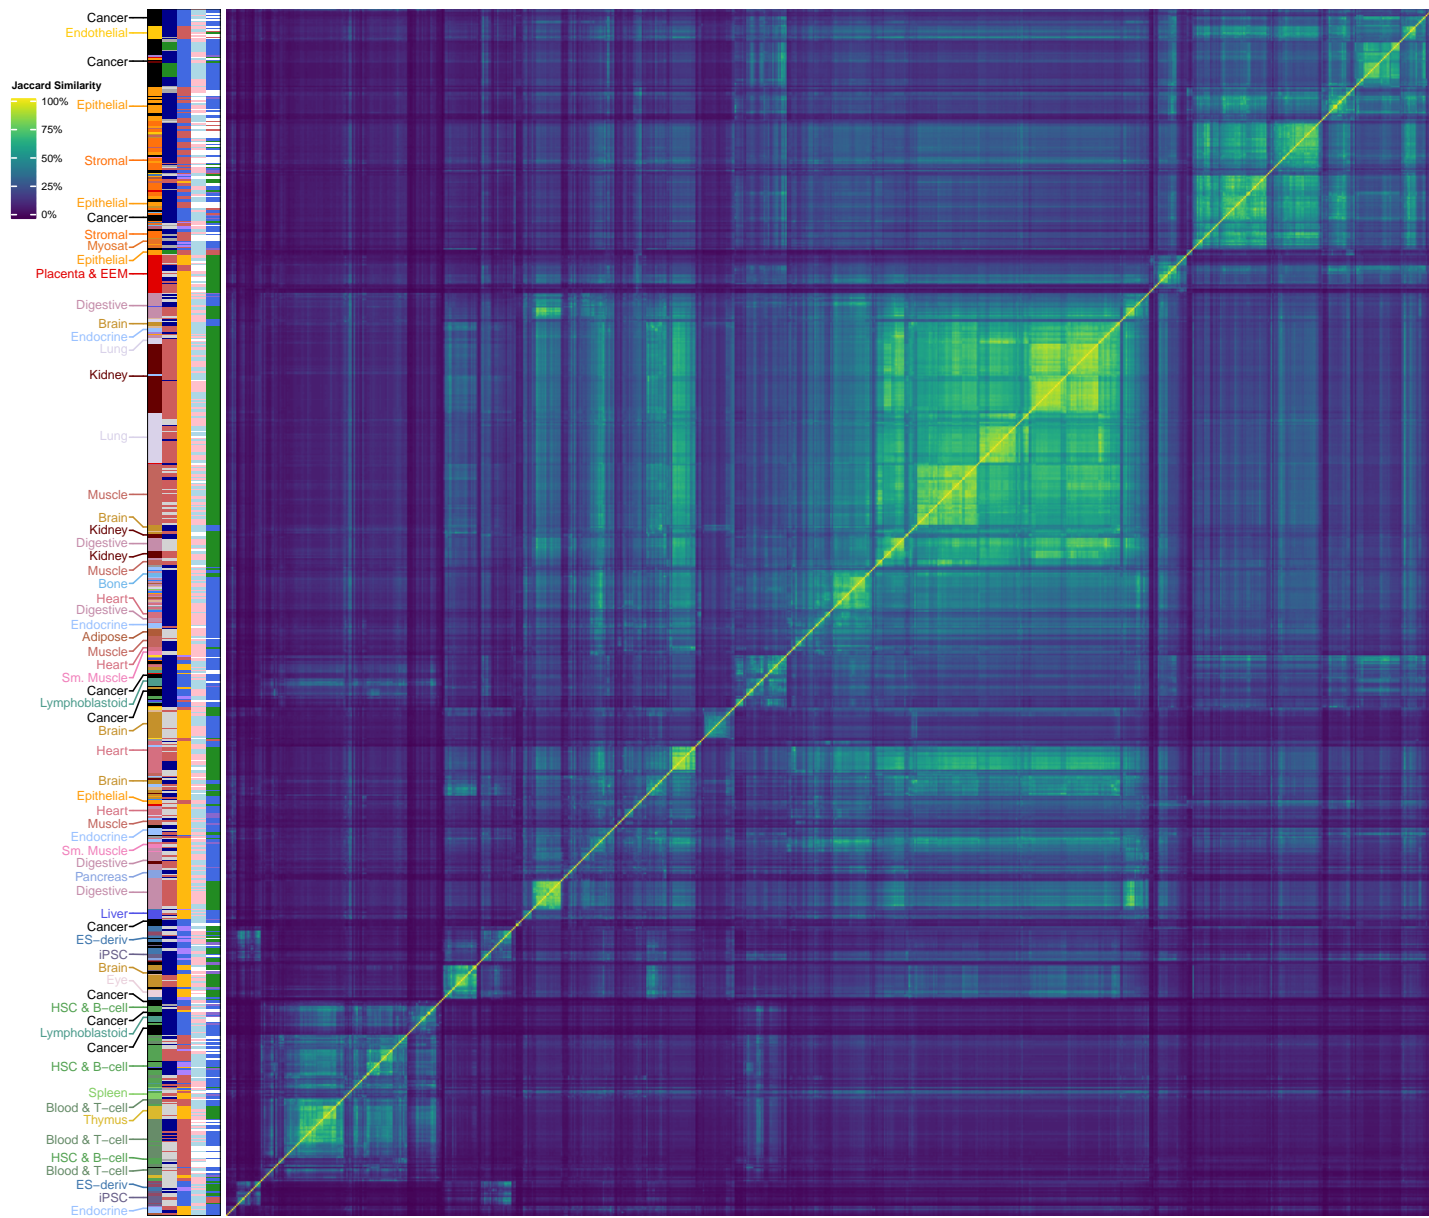

**Figure S12:** Jaccard similarity matrix (heatmap) across 833 epigenomes (metadata on left) from binarized enhancer activity matrix (2.1M enhancers by 833 epigenomes). Similarity matrix clustered by complete-linkage clustering. Consecutive blocks of at least six samples from the same group are labeled on the left.



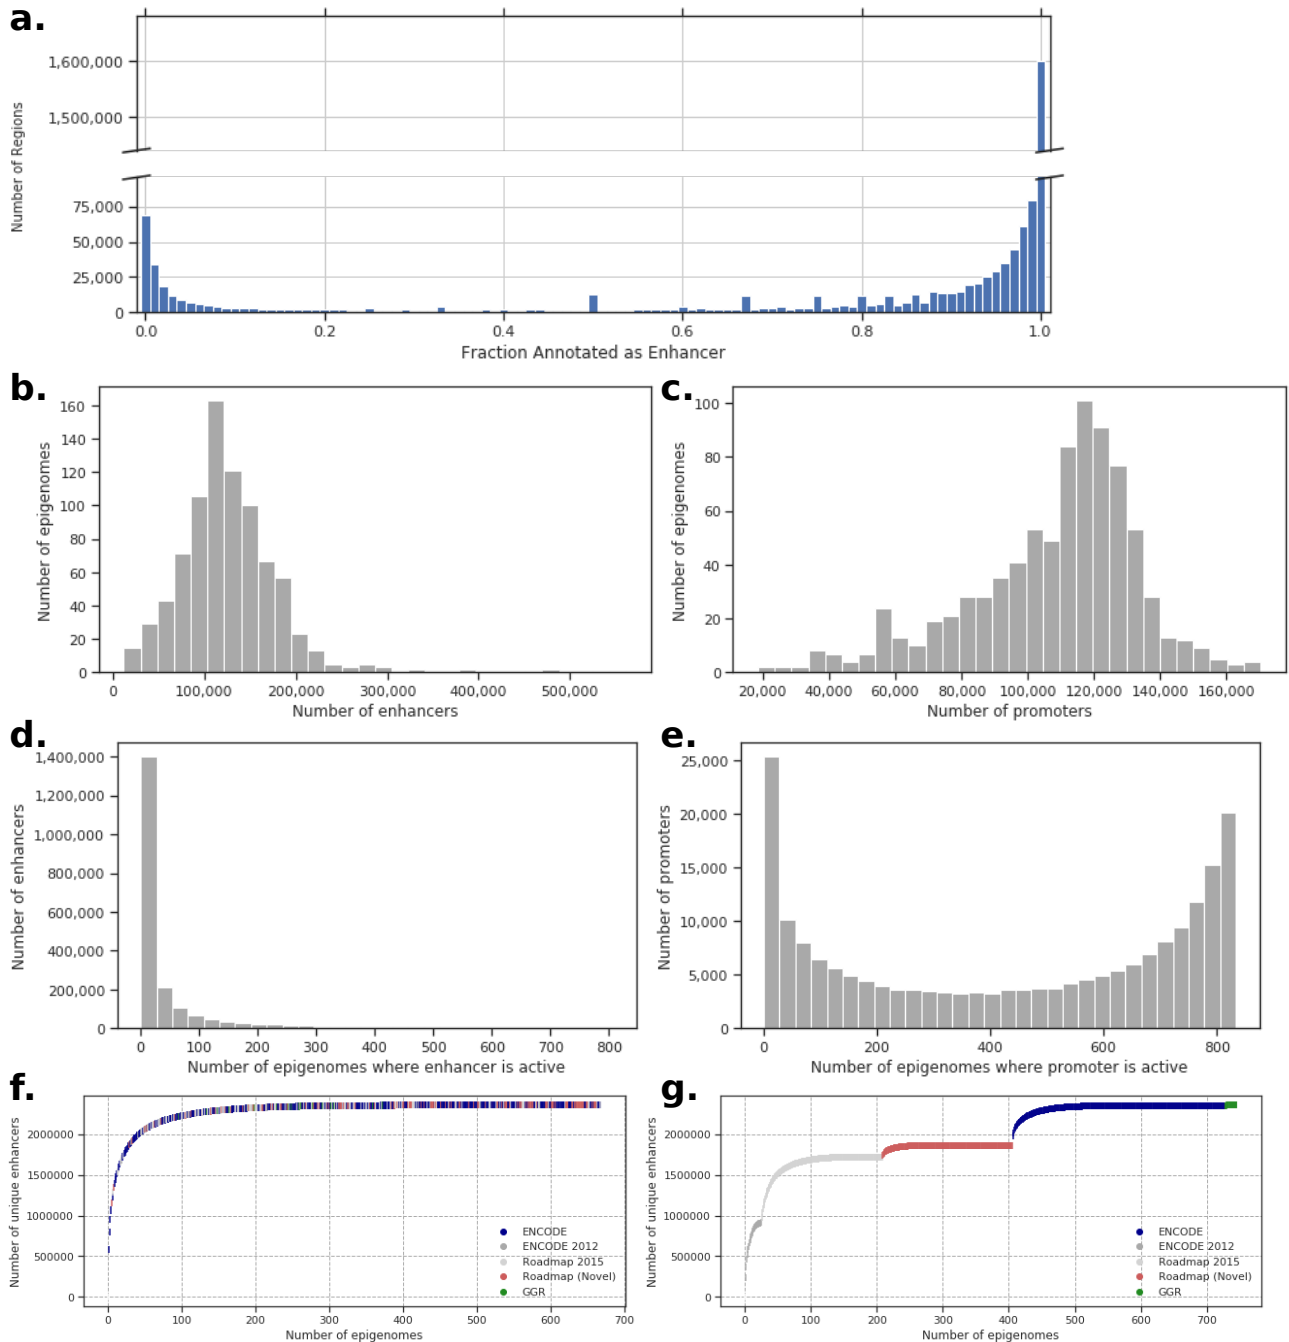

**Figure S13:** **a.** Number of DHS sites annotated as enhancers instead of promoters across 833 epigenomes. Most regions are either labeled enhancer (at least 75% of occurrences are enhancers) or promoter (at least 75% of occurrences are promoters) across all of their active occurrences. Using these cutoffs, we labeled 2,069,090 enhancers, 204,104 promoters, and 122,358 dyadic elements (neither specifically promoter or enhancer). **b,c.** Histogram of number of active enhancers (**b**) and promoters (**c**) per sample (row-margins of binary activity matrix). **d,e.** Histogram of the number of samples for which each enhancer (**d**) or promoter (**e**) is an active enhancer (column-margins of binary activity matrix) **f.** Rarefaction curve for enhancer recovery for all enhancer and dyadic elements (2.3M total) across 833 samples (points, colored by project of origin). Curve was created by iteratively adding the sample contributing the most novel active elements until all 2.3M elements were accounted for. **g.** Rarefaction curve for enhancer recovery, shown in order of project completion, for all enhancer and dyadic elements (2.3M total) across 833 samples (points, colored by project of origin). Curve was created by iteratively adding the sample contributing the most novel active elements until all 2.3M elements were accounted for. Samples were considered in order of project publication/completion, only taking samples from the next project when the current project did not contribute any more enhancers.

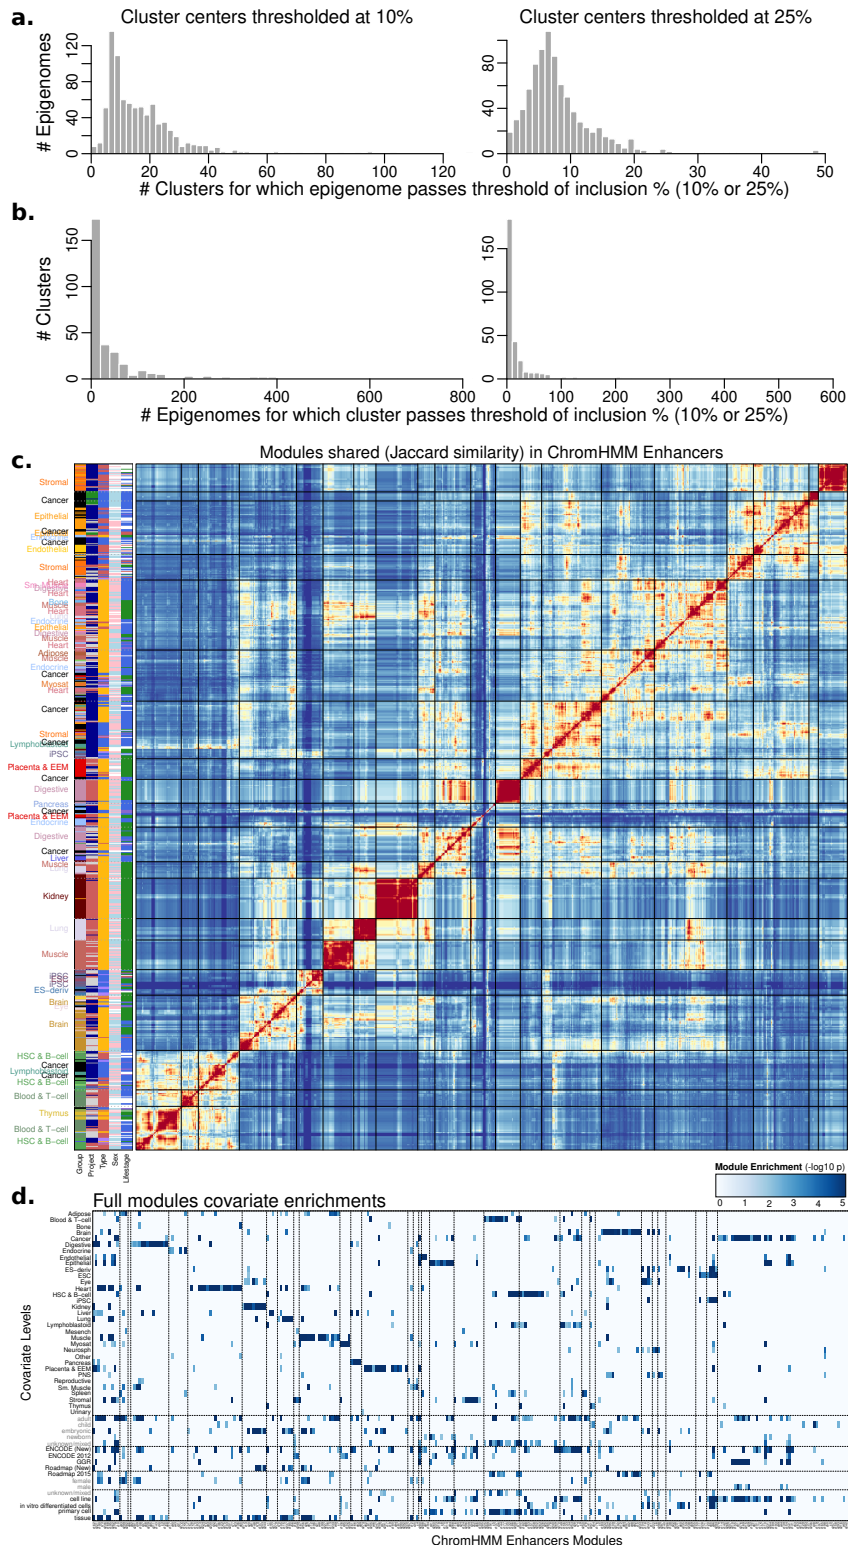

**Figure S14: a,b.** Module inclusion distributions according to two different module inclusion cutoffs of 10% and 25% (columns). **a.** Number of modules ( $N=300$ ) for each of 833 epigenomes with module inclusion of at least 10% or 25% (top). **b.** Number of epigenomes ( $N=833$ ) for each of 300 modules at the same inclusion cutoffs. **c.** Sample similarity (heatmap) across 833 epigenomes by their number of shared modules (jaccard similarity, intersection over union of modules of each pair of epigenomes). Similarity matrix clustered by Ward's method. Consecutive blocks of at least six samples from the same group are labeled on the left. **d.** Full module enrichments across main metadata facets of group, project, type, sex, and lifestage, for which the reduced version is shown as a panel in Figure 2a. Significance assessed according to hypergeometric test on the module centers matrix with module inclusion of at least 25%.

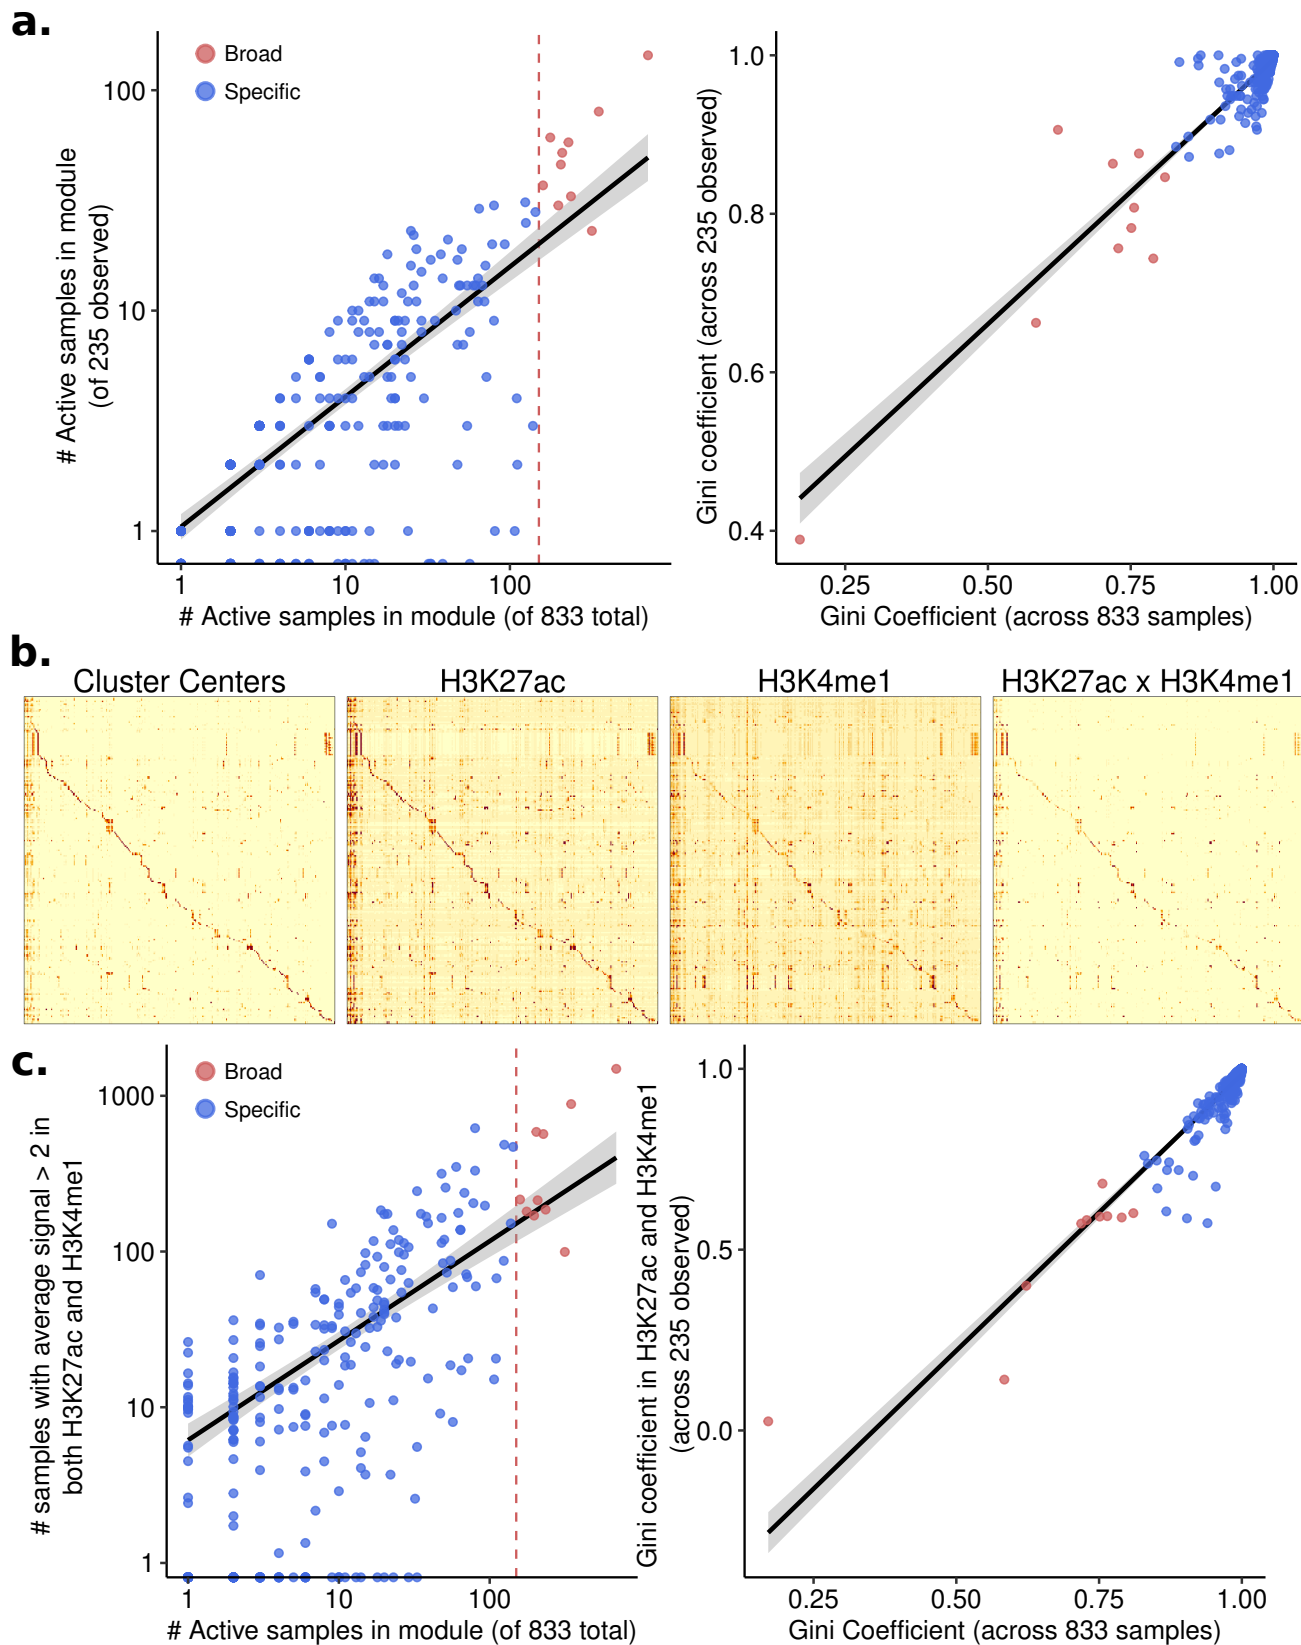

**Figure S15: Observed data validation of broad and specific modules.** **a.** Validation with 235 observed H3K27ac datasets. Number of samples (left) and Gini coefficient (right) per module in the full data versus the observed-only H3K27ac data. Broad modules are defined as modules with over 150 active samples in the full data (dashed line) and labeled in red. Despite the sample composition differences in observed vs. full data, the fraction of active samples is quite consistent between the datasets (left,  $R^2=0.802$ , right  $R^2=0.82$ ). For the 10 broad modules (red) from the full data, all were active in at least 9.7



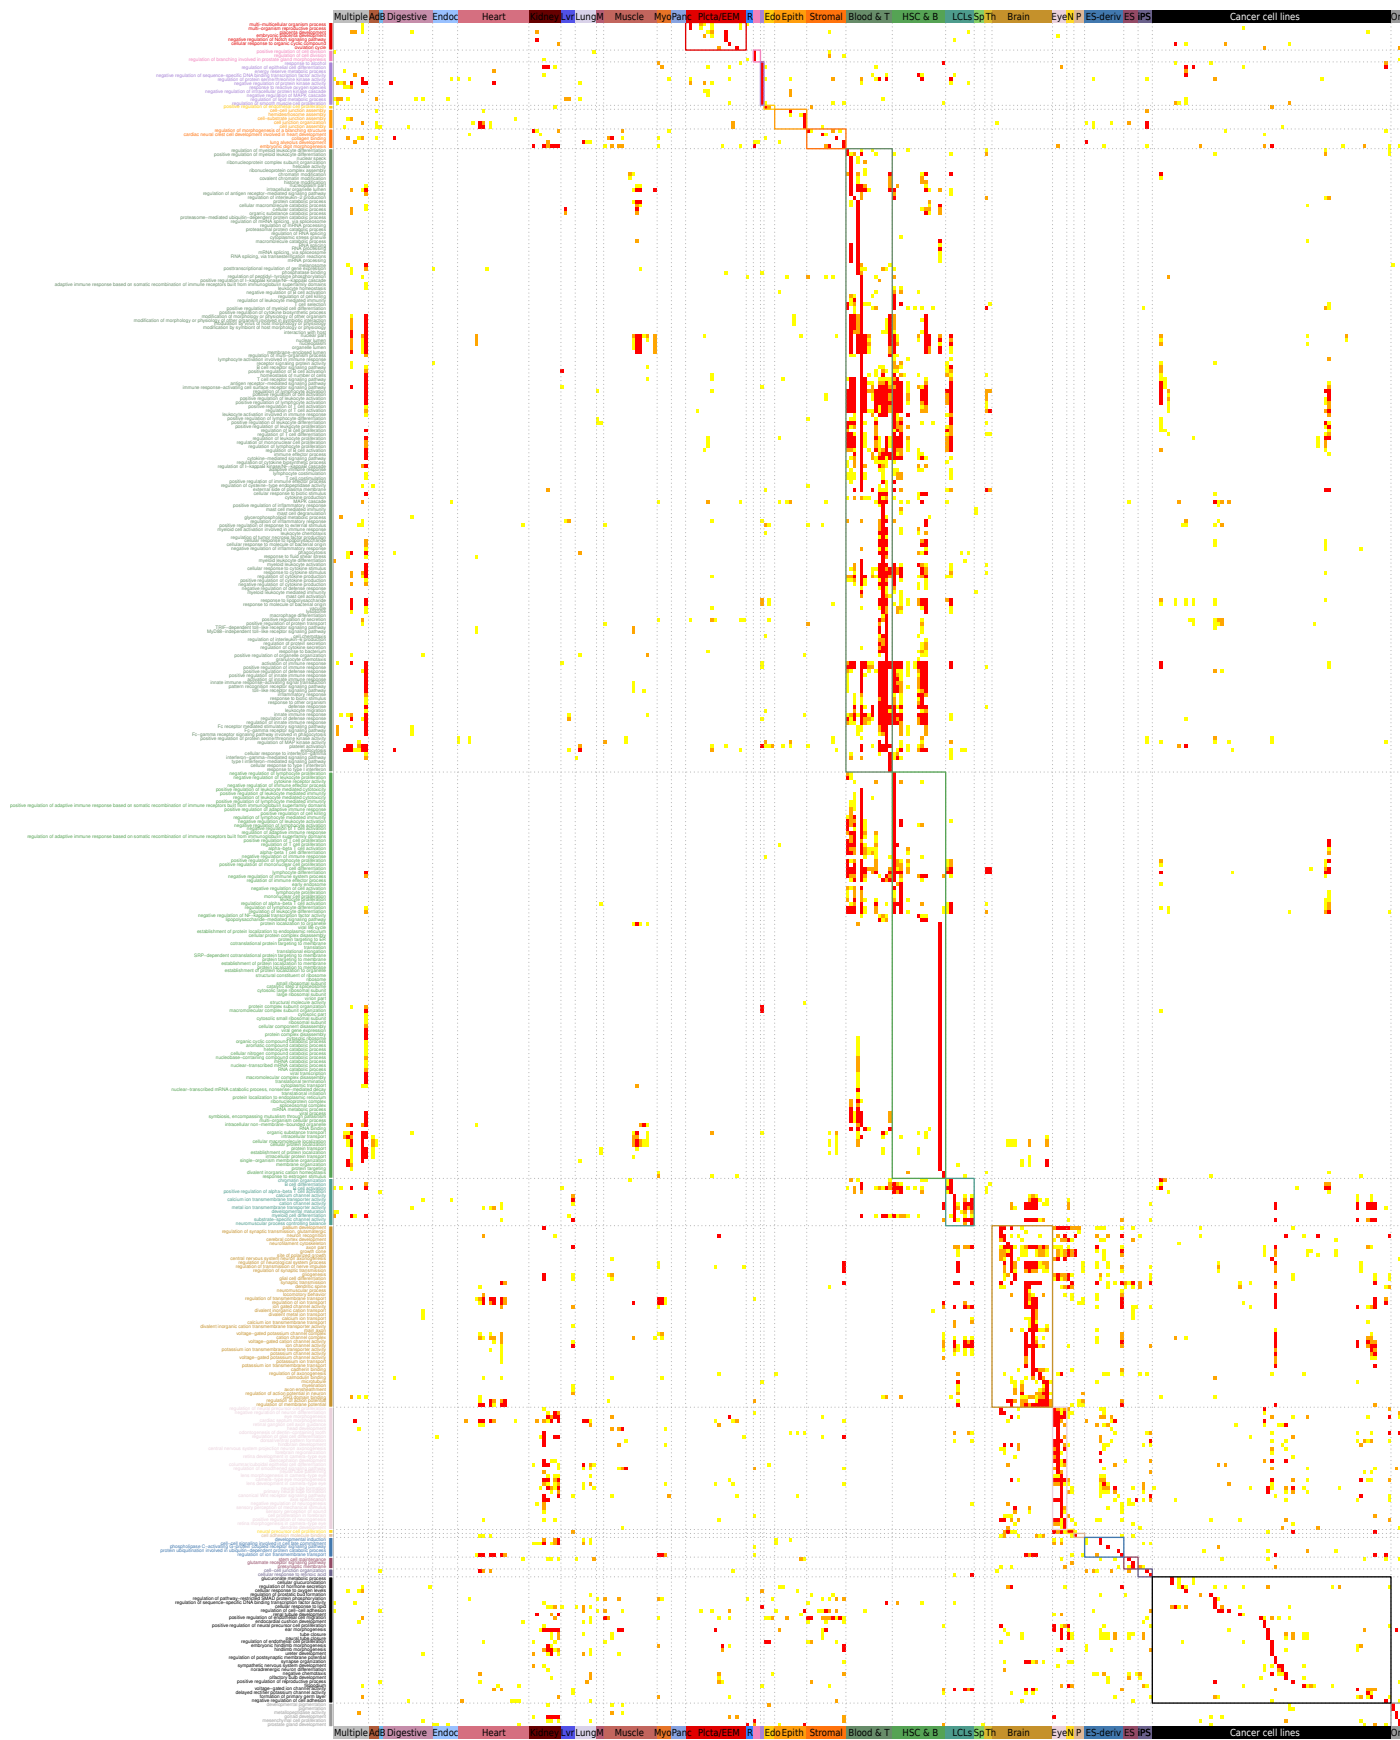

Figure S16: (continued)



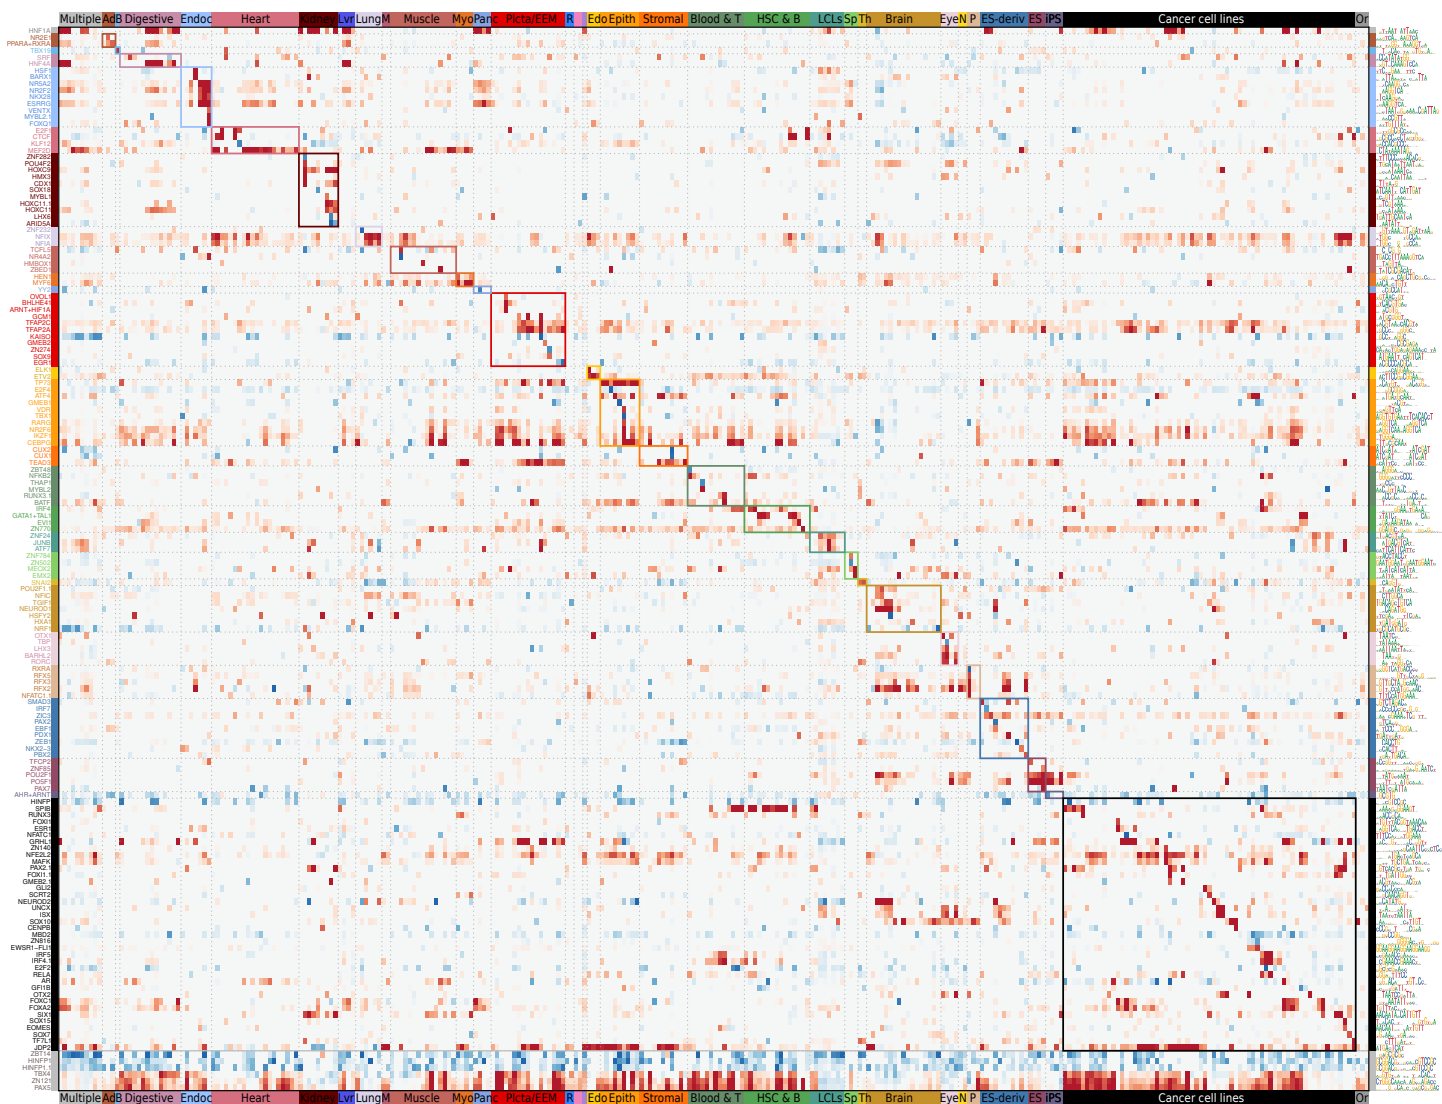

**Figure S17:** Full motif enrichments for 160 motif families with enrichments with  $\log_2FC \geq 1$  on modules (Figure 2c).



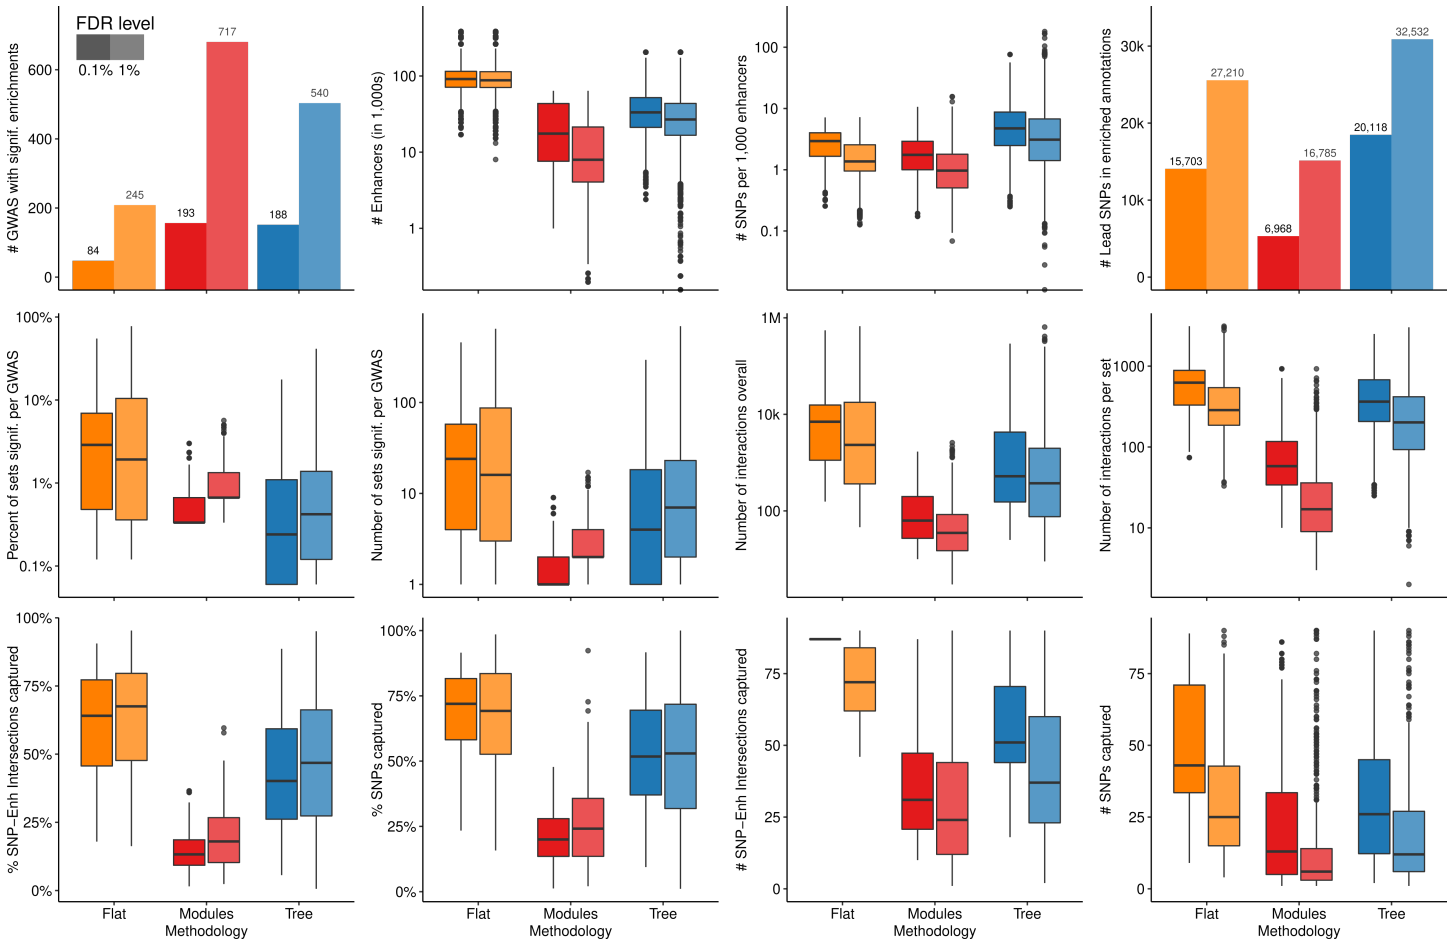

**Figure S18:** Extended method validation figures comparing epigenomic GWAS enrichments using different methodologies (x-axis) for three FDR cutoffs (shades). First and last figures from top row are shown as Extended Data Fig. 7e.









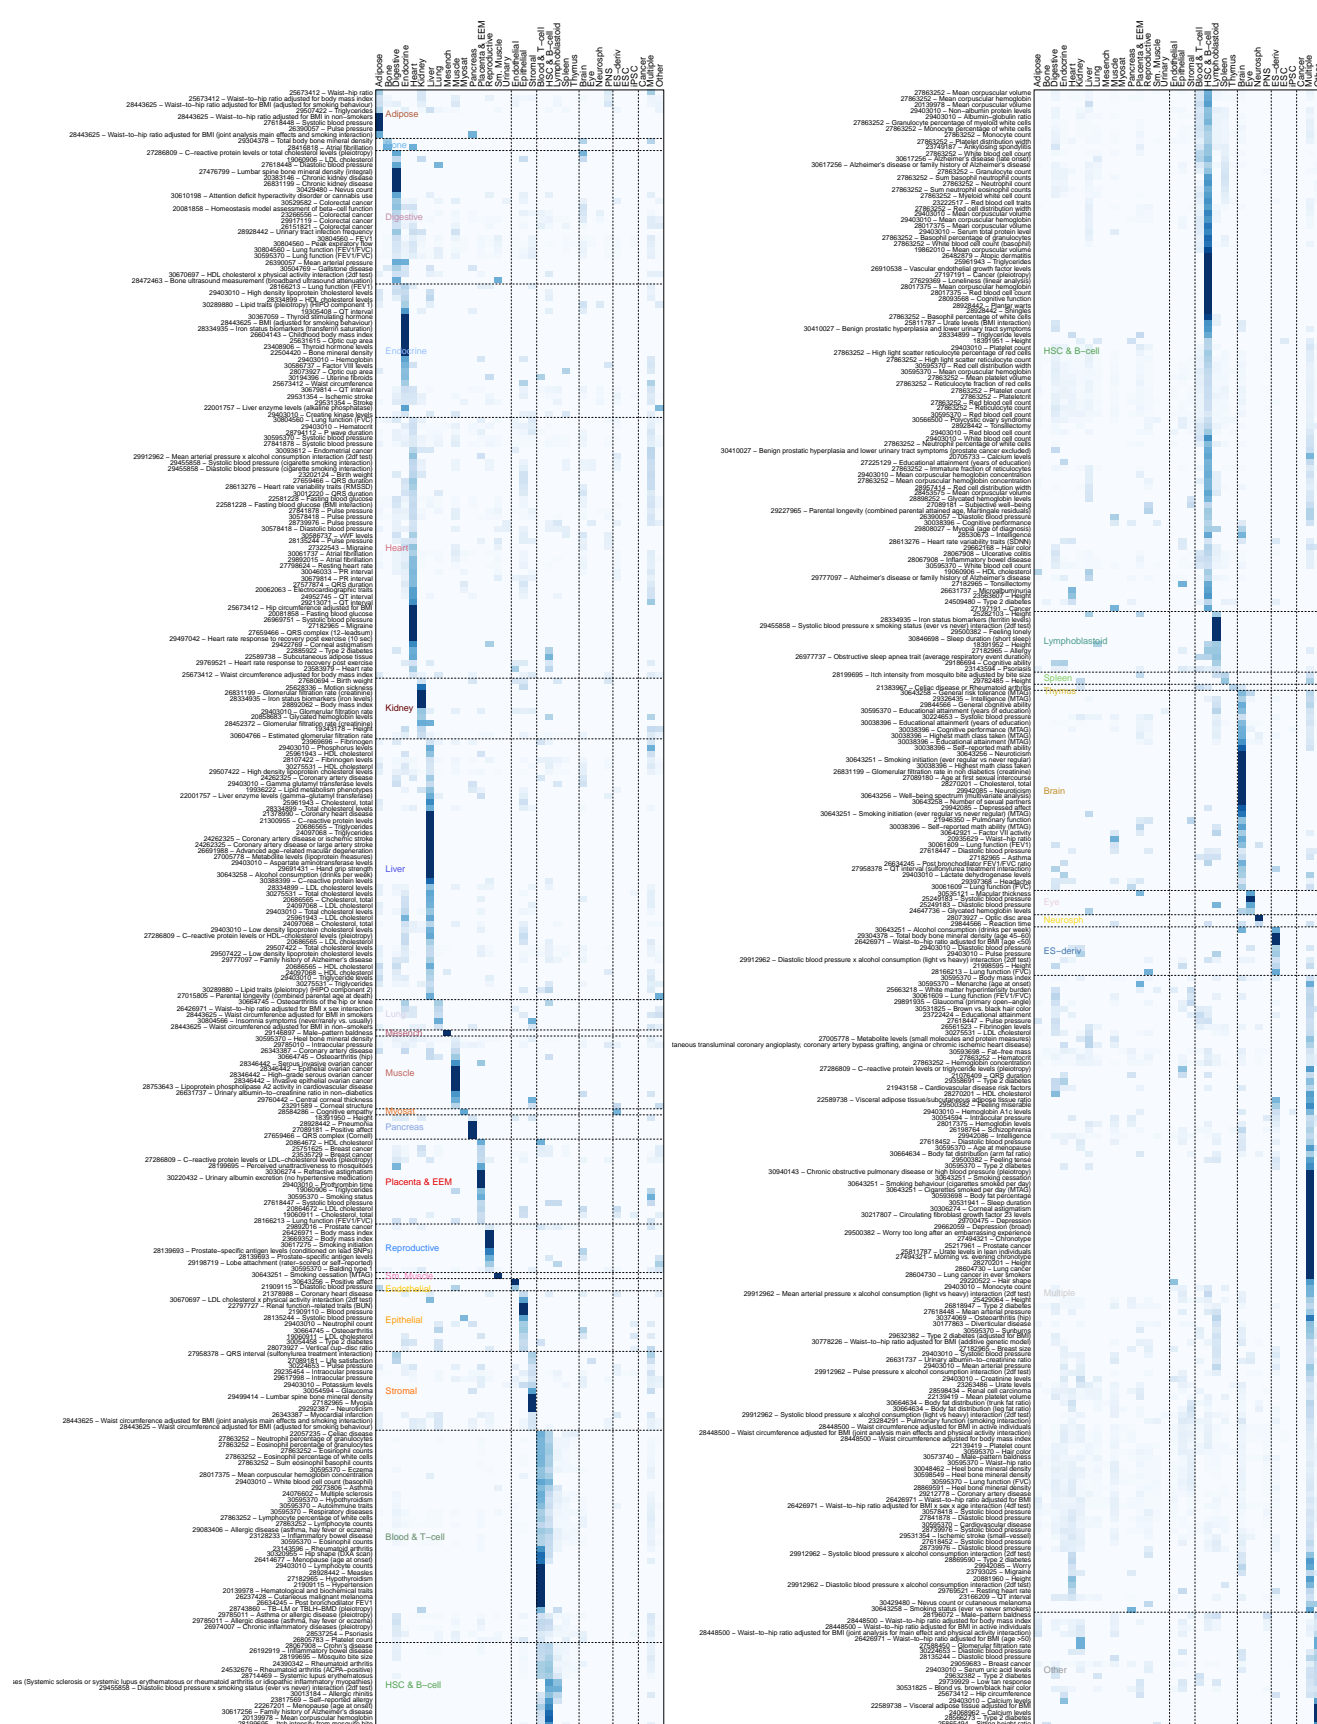

**Figure S21:** Overall tissue-level prioritization of 540 traits at FDR < 1%. Heatmap represents trait (rows) vs. tissue matrix and is split for visibility. Traits are diagonalized according to their top tissue enrichment, and values are the trait-normalized and tissue aggregated  $-\log_{10}p$ -values.





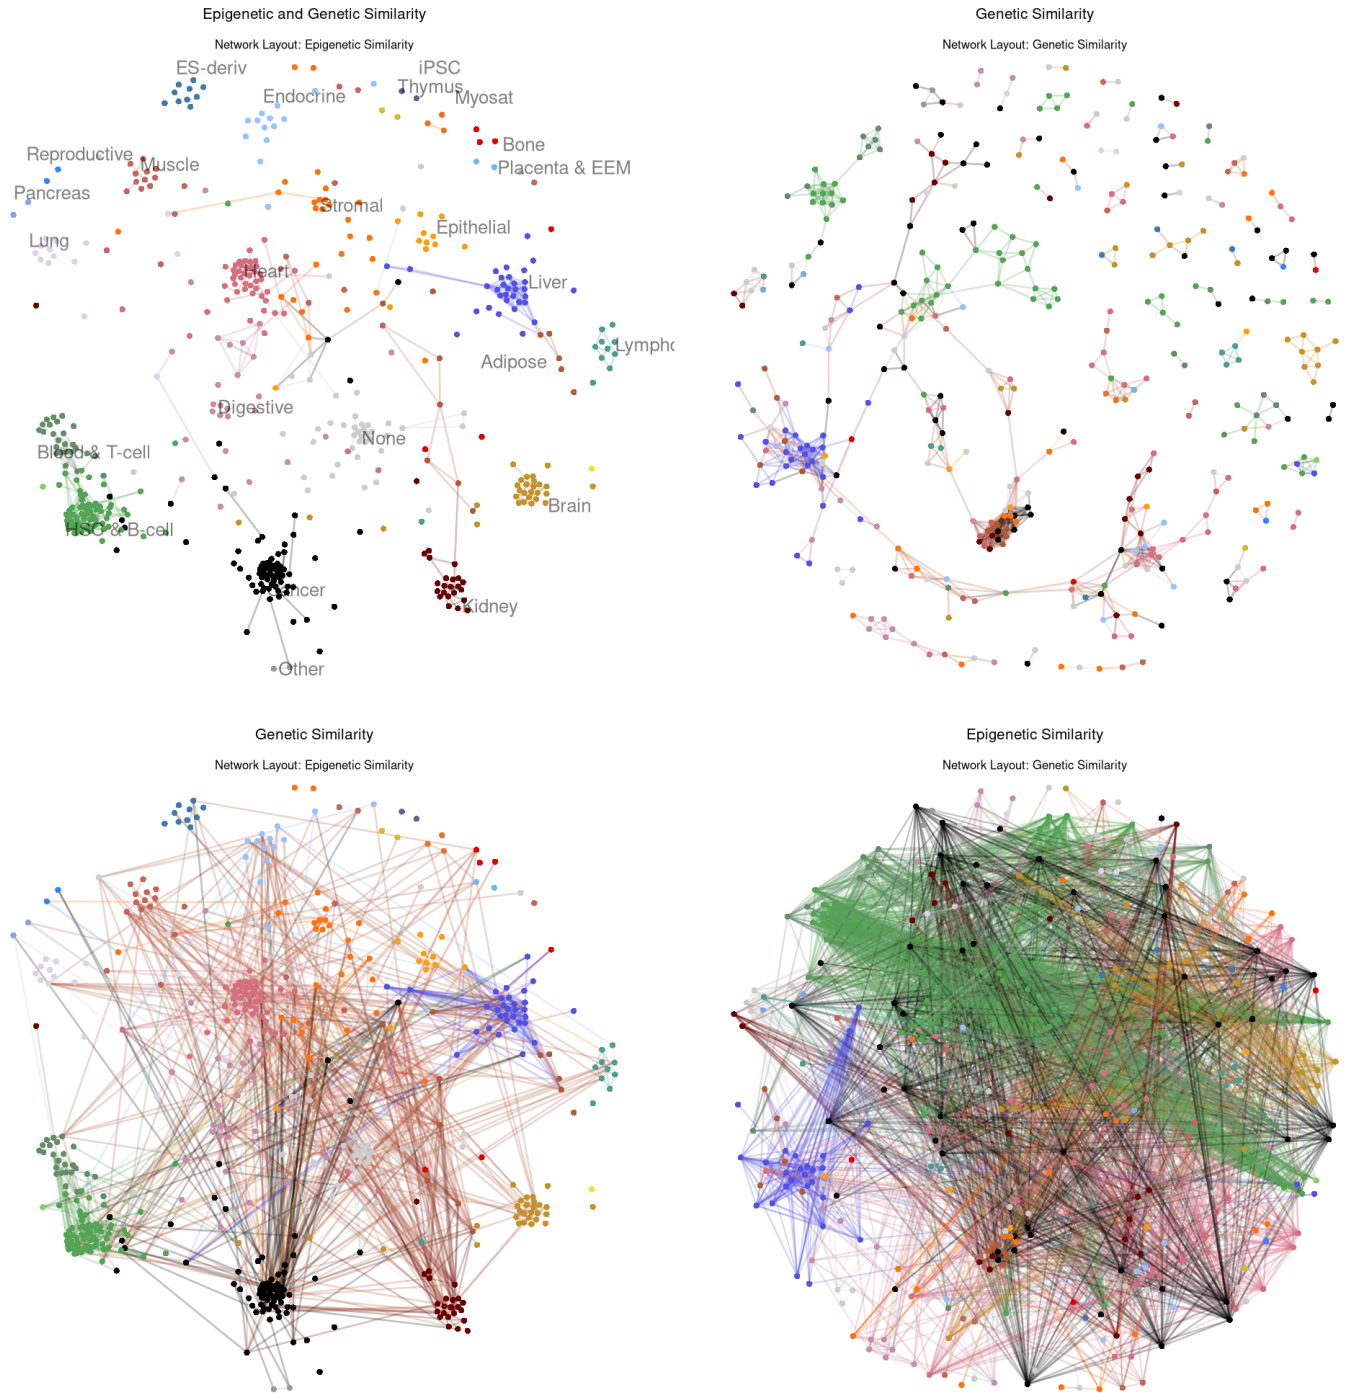

**Figure S23:** Comparison networks with genetics and epigenetics. (top left) Edges with both high epigenetic similarity and any genetic overlap on epigenetic similarity layout. (bottom left) All trait pairs with genetic overlap ( $> 5\%$  jaccard similarity of lead SNPs overlapping when binned into 10k bp bins starting from the start of each chromosome, network using epigenetic layout). (top right) Network of trait pairs with any genetic overlap laid out by genetics. (bottom right) All trait pairs with high epigenetic similarity on the genetic layout network

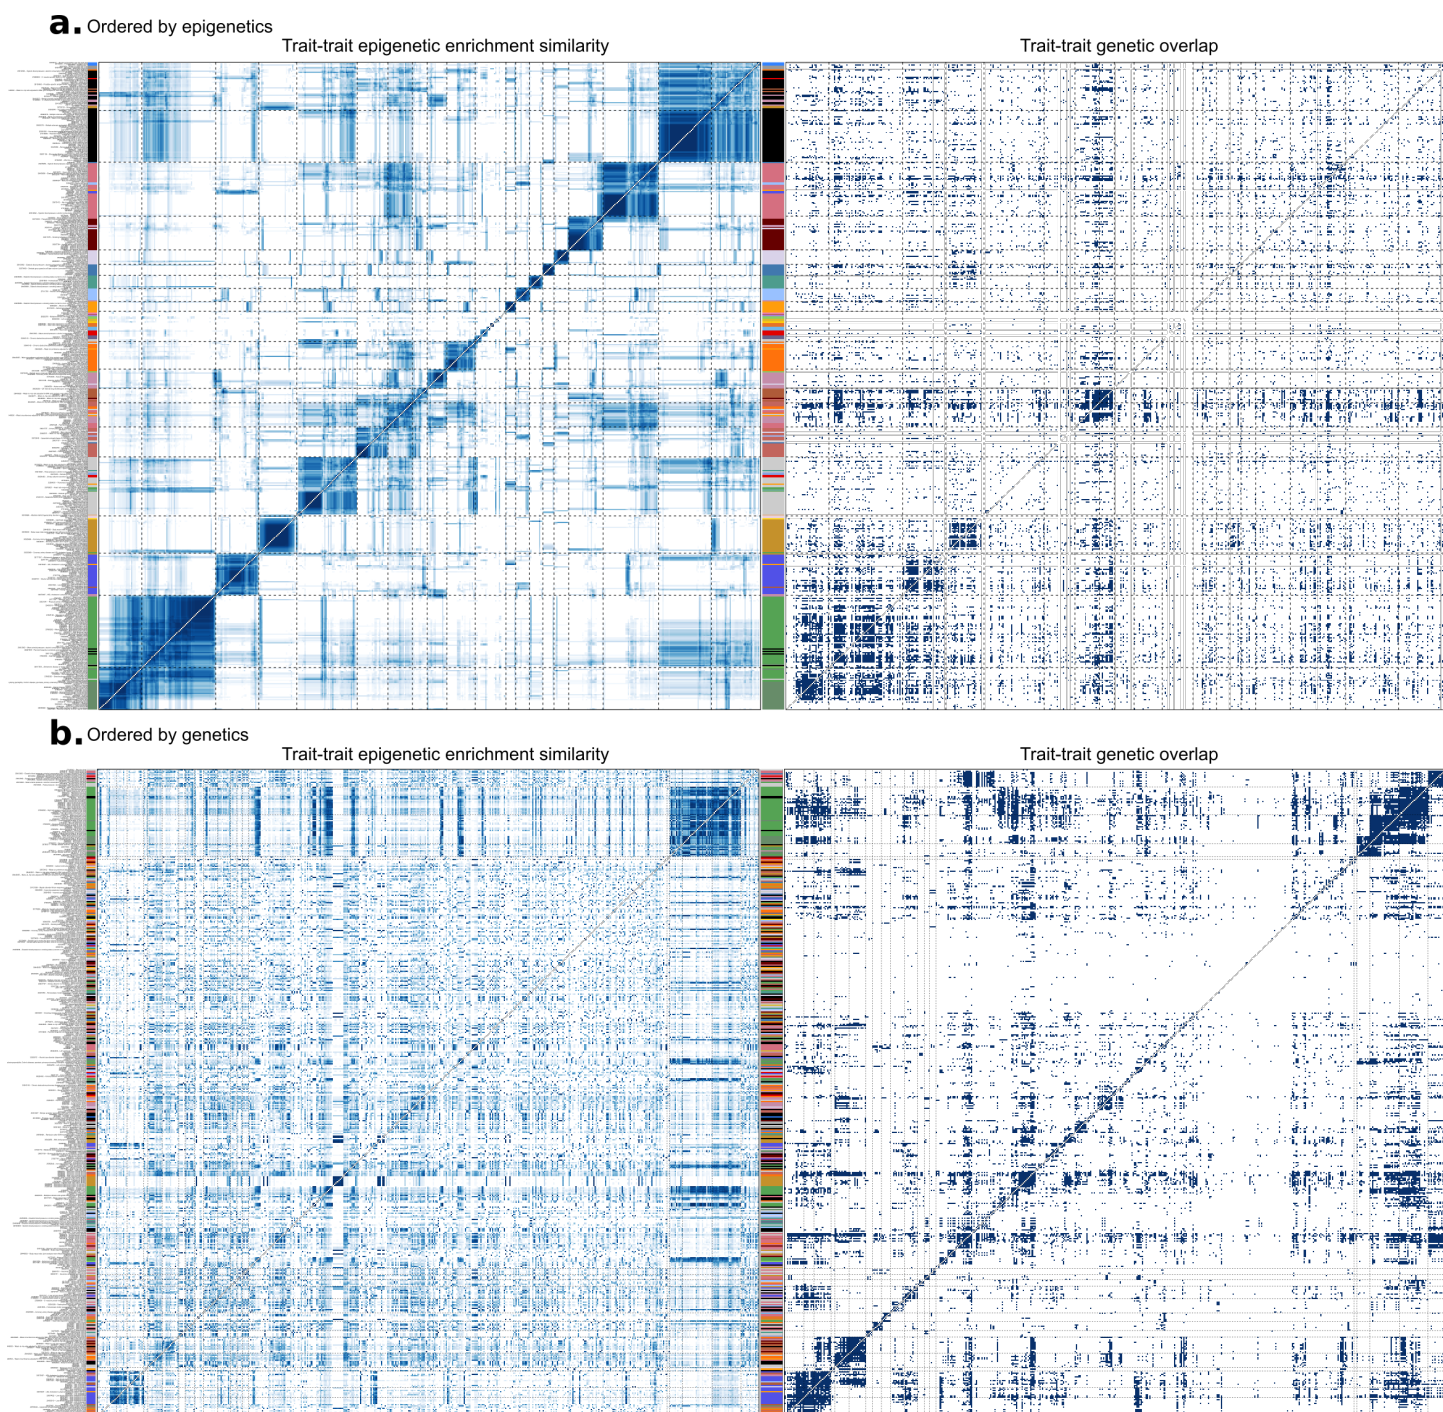

**Figure S24:** **a.** Trait-trait similarity matrix by cosine similarity of epigenetic enrichments (left) and by 0/1 genetic similarity (defined as  $> 5\%$  jaccard similarity of lead SNPs overlapping when binned into 10k bp bins starting from the start of each chromosome). Matrices are ordered by hierarchical clustering according to Ward's method on the epigenetic matrix. **b.** Epigenetic similarity (left) and genetic similarity (right) matrices, as above. Matrices ordered by hierarchical clustering according to Ward's method on the genetic similarity matrix.



## Two simple example cases where epigenomic and genetic trait-trait overlaps can disagree

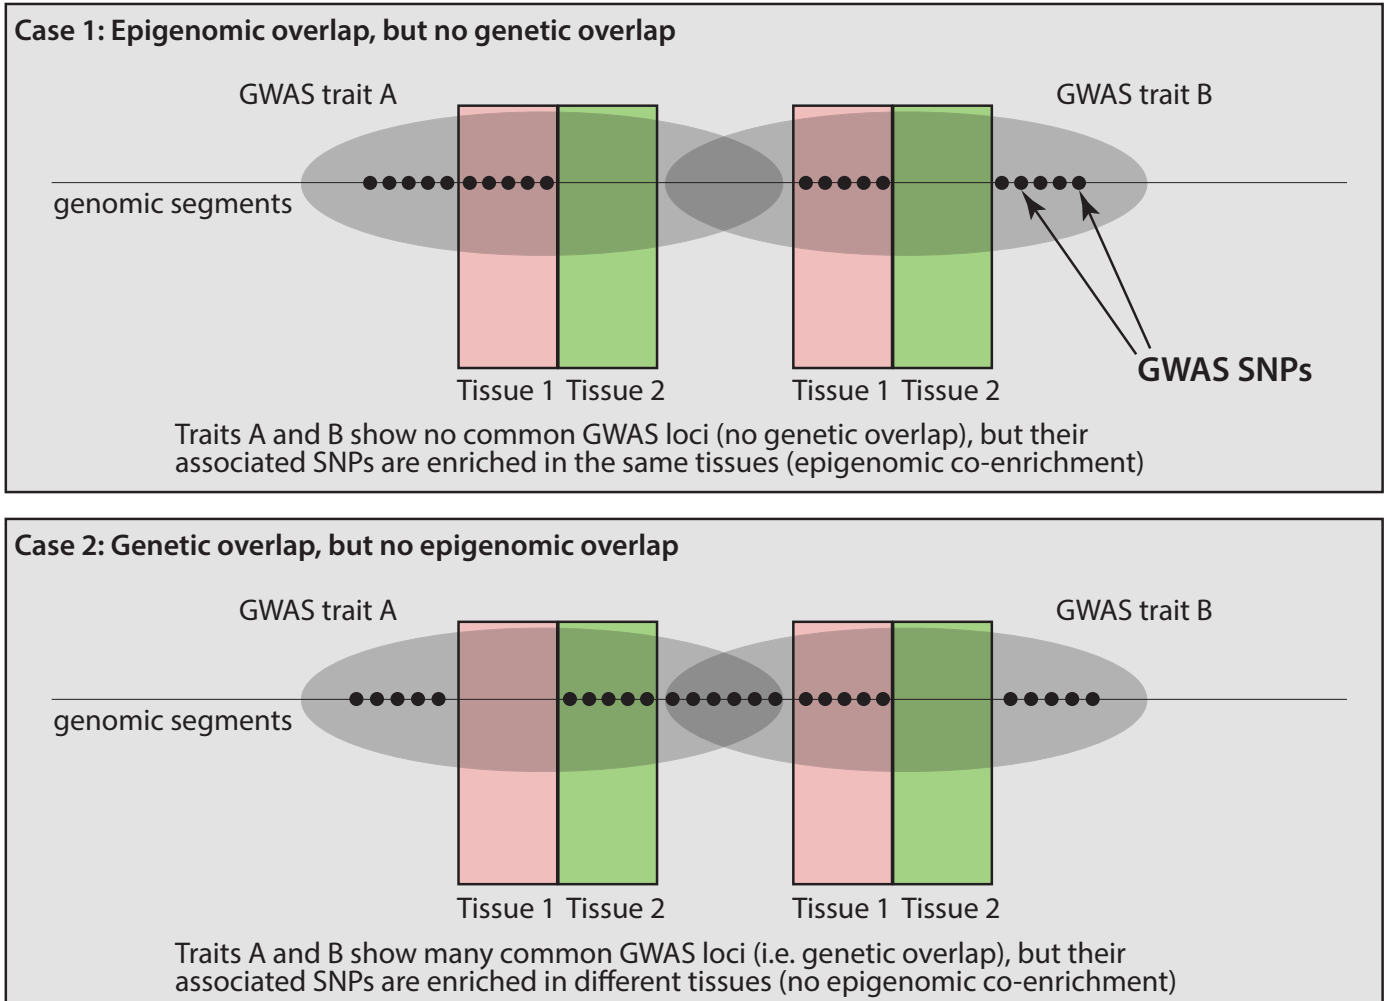

**Figure S25:** Two example cases where the epigenetic and the genetic trait-trait links may not agree.

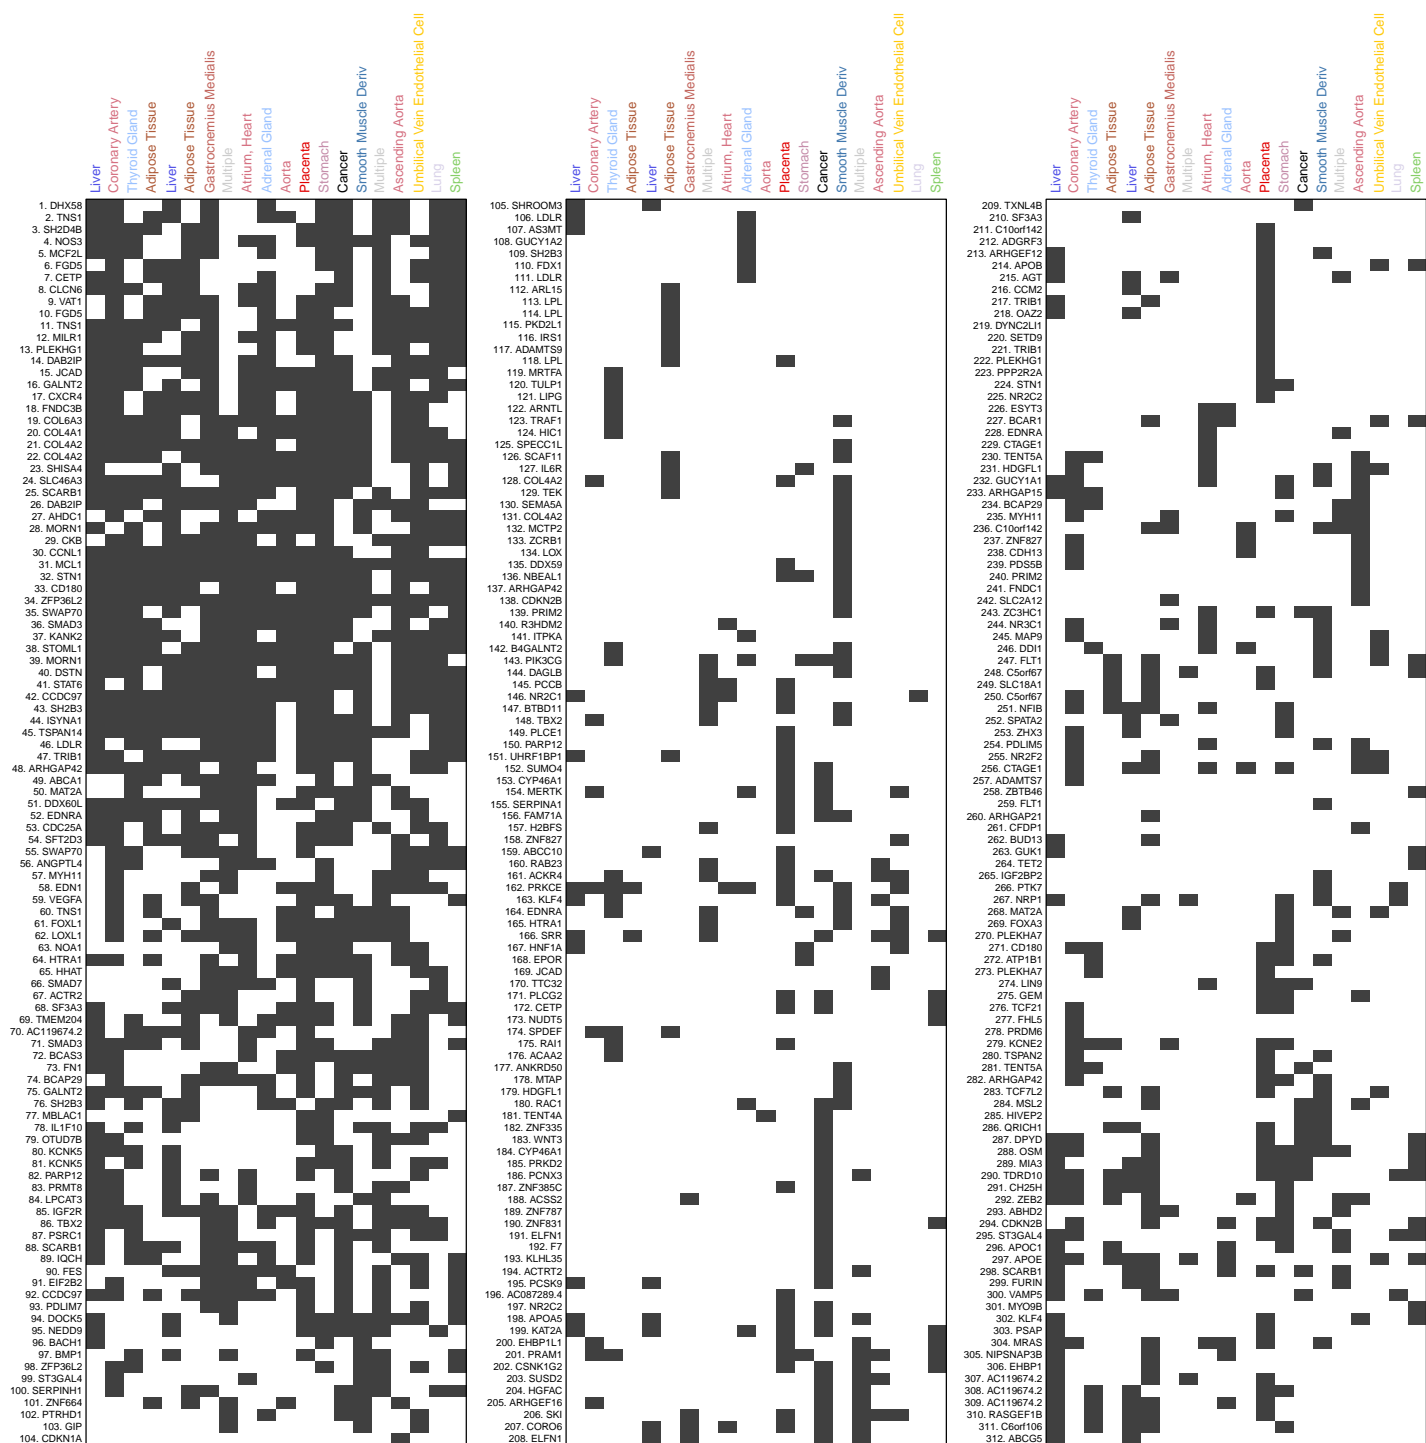

**Figure S26:** Loci of lead SNPs for CAD in top 20 significantly enriched nodes. Matrix is split in three and shows 312 SNPs against 20 nodes, by presence (black) or absence (white) in the node's enhancers. Loci are ordered by clustering their jaccard similarity across nodes using the Ward method. Each SNP is annotated with its nearest protein-coding gene.

**Add specific samples (by short name):**

**Add specific samples (by full name):**

**Select from:**  
 Groups  Tree

**Add samples from sample groups or enhancer tree:**

- Endocrine
  - iPSC/ESC/ES-deriv
    - BSS00716:ESC
    - BSS00717:IPSC
    - BSS00478:ESC
    - BSS00484:ESC
    - BSS01115:ESC
    - BSS00716:ESC
    - BSS00717:ESC
    - BSS00731:IPSC
    - BSS00732:IPSC
    - BSS00733:IPSC
    - BSS00734:IPSC
    - BSS00736:IPSC
    - BSS00737:IPSC
    - BSS00739:IPSC
    - BSS01263:MESENODERM DERIV
    - BSS01370:NEURAL PROGENITOR DERIV
    - BSS01371:NEURAL PROGENITOR DERIV
  - Hematopoietic Cells
    - T-cells & Thymus
      - BSS00189:CD4+ T CELL
      - BSS00190:CD4+ T CELL

Sample Table [Preset TrackHubs and Views](#) [Make Custom TrackHubs](#)

Show 10 entries Search:

| Group          | Short name                  | Full name                                               | Lifestage     | Age     | Sex           | Type         | Project       | Donor                   |
|----------------|-----------------------------|---------------------------------------------------------|---------------|---------|---------------|--------------|---------------|-------------------------|
| Blood & T-cell | CD4 T CELL                  | CD4-positive, alpha-beta T cell                         | unknown/mixed | unknown | unknown/mixed | primary cell | Roadmap 2015  | ENCDO194EHQ,ENCDO779YRY |
| Blood & T-cell | CD4 T CELL                  | CD4-positive, alpha-beta T cell female adult (33 years) | adult         | 33      | female        | primary cell | Roadmap (New) | ENCDO412QUR             |
| ESC            | ESC                         | ES-i3                                                   | embryonic     | unknown | female        | cell line    | Roadmap 2015  | ENCDO840PTG             |
| Endothelial    | GLOMERULUS ENDOTHELIAL CELL | glomerular endothelial cell                             | unknown/mixed | unknown | unknown/mixed | primary cell | ENCODE (New)  | ENCDO248AAA             |
| IPSC           | IPSC                        | GM23338 male adult (53 years) originated from GM23248   | adult         | 53      | male          | cell line    | ENCODE (New)  | ENCDO336AAA             |
| Placenta & EEM | TROPHOBLAST                 | HTR-8 SVneo                                             | embryonic     | 6-12    | unknown/mixed | cell line    | ENCODE (New)  | ENCDO252AAA             |
| ESC            | ESC                         | HUES48                                                  | embryonic     | unknown | female        | cell line    | Roadmap 2015  | ENCDO741IWK             |
| ESC            | ESC                         | HUES6                                                   | embryonic     | unknown | female        | cell line    | Roadmap 2015  | ENCDO734LQV             |
| Liver          | LIVER                       | liver male adult (32 years)                             | adult         | 32      | male          | tissue       | Roadmap (New) | ENCDO060AAA             |
| Muscle         | TONGUE                      | tongue male embryo (72 days)                            | embryonic     | 72      | male          | tissue       | ENCODE (New)  | ENCDO300THQ             |

Showing 1 to 10 of 10 entries Previous  Next

[Download Table](#)

**Add specific samples (by short name):**

**Add specific samples (by full name):**

**Select from:**  
 Groups  Tree

**Add samples from sample groups or enhancer tree:**

- Adipose
  - BSS00386:ADIPOSE TISSUE
  - BSS00493:ADIPOSE TISSUE
  - BSS01263:ADIPOSE TISSUE
  - BSS01266:ADIPOSE TISSUE
  - BSS01665:ADIPOSE TISSUE
  - BSS01666:ADIPOSE TISSUE
  - BSS01667:ADIPOSE TISSUE
  - BSS01668:ADIPOSE TISSUE
  - BSS01669:ADIPOSE TISSUE
- Blood & T-cell
- Bone
- Brain
- Cancer
- Digestive
  - BSS00217:DUODENUM MUCOSA
  - BSS00218:DUODENUM MUCOSA
  - BSS00270:DUODENUM MUCOSA
  - BSS00271:DUODENUM MUCOSA
  - BSS00316:ESOPHAGUS
  - BSS00318:ESOPHAGUS

Sample Table [Preset TrackHubs and Views](#) [Make Custom TrackHubs](#)

**TrackHub Options:**

**Track type(s):**  
 Imputed  
 Observed  
 Both

**Marks/Assays (by set):**  
 Tier 1 (Core Marks + DNase-seq)  
 Tier 2 (Secondary Marks + ATAC-seq)  
 Tier 3 (DNA Factors)  
 Tier 4 (Other Marks)

**Specific histone marks and assays to add to the track hub:**

**Currently have 121 tracks, covering 13 samples across 7 assays**  
 Note: Some sample by assay combinations may either have both imputed and observed data or neither.

[Download WUSTL TrackHub](#) [Download UCSC TrackHub](#) [Download File List](#)

**Usage Instructions:**  
 WUSTL Epigenome Browser (Legacy):  
 1. Select tracks and download WUSTL TrackHub (json formatted)  
 2. Go to the [WUSTL Browser \(legacy\)](#)  
 3. Select the Tracks > Custom Tracks > Add new tracks > Datahub by upload > Upload File

**NOTE: We do not recommend loading more than 100 tracks in the same WUSTL legacy track hub.**  
 The WUSTL legacy client does not allow you to select specific tracks from a hub.

WUSTL Epigenome Browser (new):  
 1. Select tracks and download WUSTL TrackHub (json formatted)  
 2. Go to the [WUSTL Browser \(new\)](#)  
 3. Select the Tracks > Remote Tracks > Add Remote Data Hub > Upload File

**Figure S27: a.** Example screenshot from interactive browser showing dataset selection by groups and by enhancer tree, metadata, and custom trackhub creation.

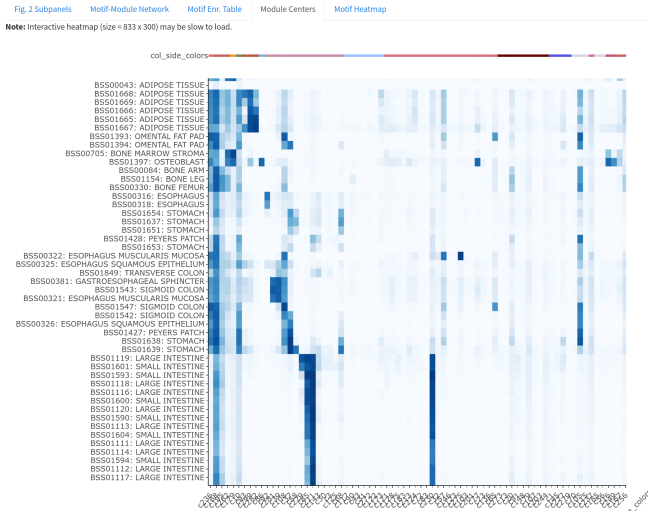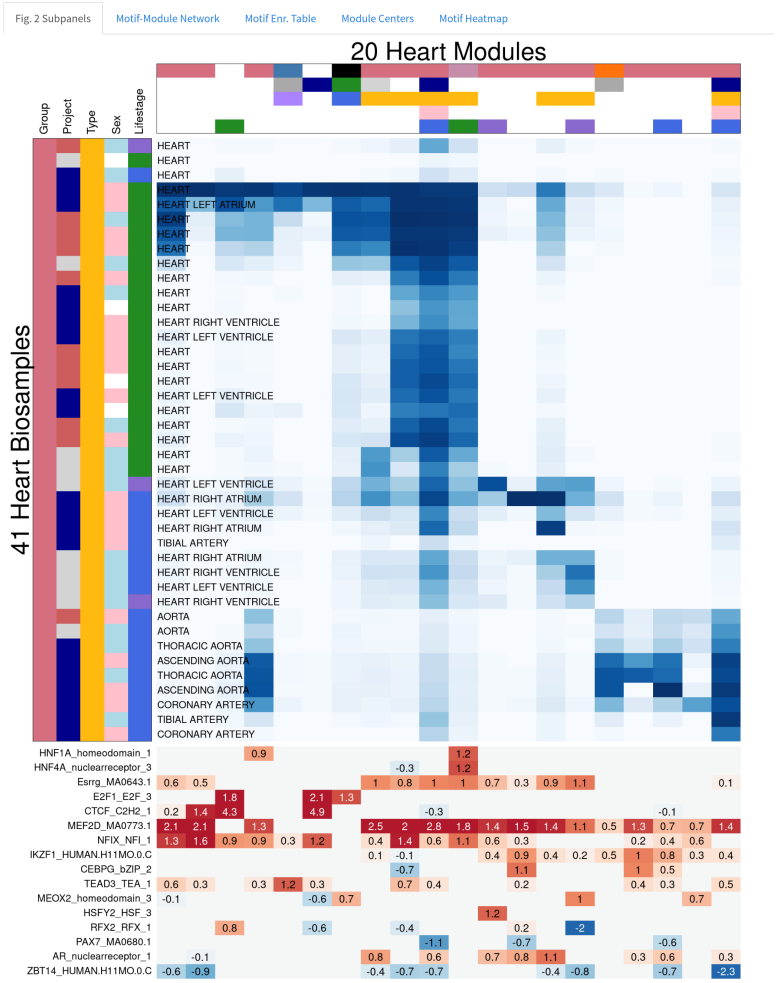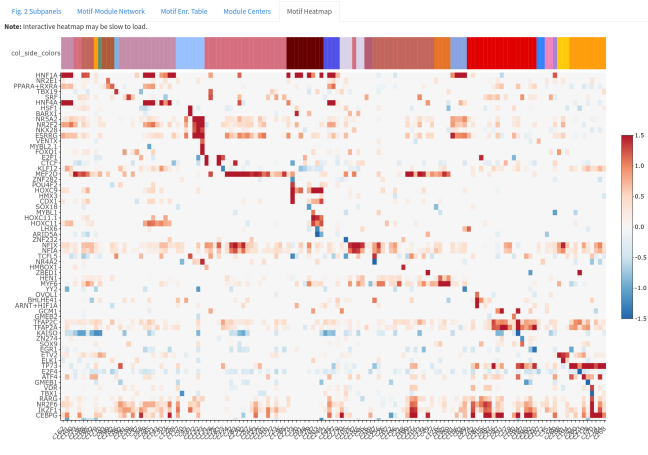

Fig. 2 Subpanels Motif-Module Network Motif Enr. Table Module Centers Motif Heatmap

Show 10 entries

Search:

| cls | motif    | log2FC | fullName              | cls.group   | motif.logo   |
|-----|----------|--------|-----------------------|-------------|--------------|
| c81 | ELK1     | 1.835  | ELK1_ETS_3            | Endothelial | ACTTCCGCGGAA |
| c81 | JDP2     | 2.146  | JDP2_bZIP_1           | Endothelial | ATGAATCAI    |
| c8  | GMEB1    | -1.795 | Gmeb1_MA0615.1        | Epithelial  | CGT          |
| c8  | HINFP1.1 | -1.661 | HINFP1_C2H2_3         | Epithelial  | CGGACGTCGCCG |
| c8  | TP73     | 3.086  | TP73_MA0861.1         | Epithelial  | CAAGTCAAG    |
| c8  | ZBT14    | -1.691 | ZBT14_HUMAN.H11MO.0.C | Epithelial  | AGCGCGC      |
| c76 | CEBPg    | 1.944  | CEBPg_bZIP_2          | Cancer      | TTCCGAA      |
| c76 | FOXA2    | 1.604  | FOXA2_HUMAN.H11MO.0.A | Cancer      | TTTAC        |
| c75 | GRHL1    | 2.282  | GRHL1_CP2_1           | Cancer      | ACGACGCT     |
| c75 | HNF1A    | 1.518  | HNF1A_homeodomain_1   | Cancer      | TAAATTAAC    |

Showing 31 to 40 of 433 entries

Download Table

Previous 1 2 3 4 5 ... 44 Next

Figure S27: b. Example screenshots from interactive browser showing exploration of modules and motifs, subpanels of Figure 2 for heart, and motif enrichments as a table.





Select single GWAS of interest (PubMedID - Trait):  
 27863252 - Red cell distribution width

Previous Next FDR: 0.1%

Filter tables by enrichment:

Filter tables by SNP:

Maximum distance between SNP and center of enhancer:  
 0 2,500

Show prioritization:  
 All  
 Has linked gene  
 Linked gene disagrees with nearest gene

Select multiple GWAS of interest to plot side-by-side:

Image Scale (for side-by-side):  
 0.25 1 2

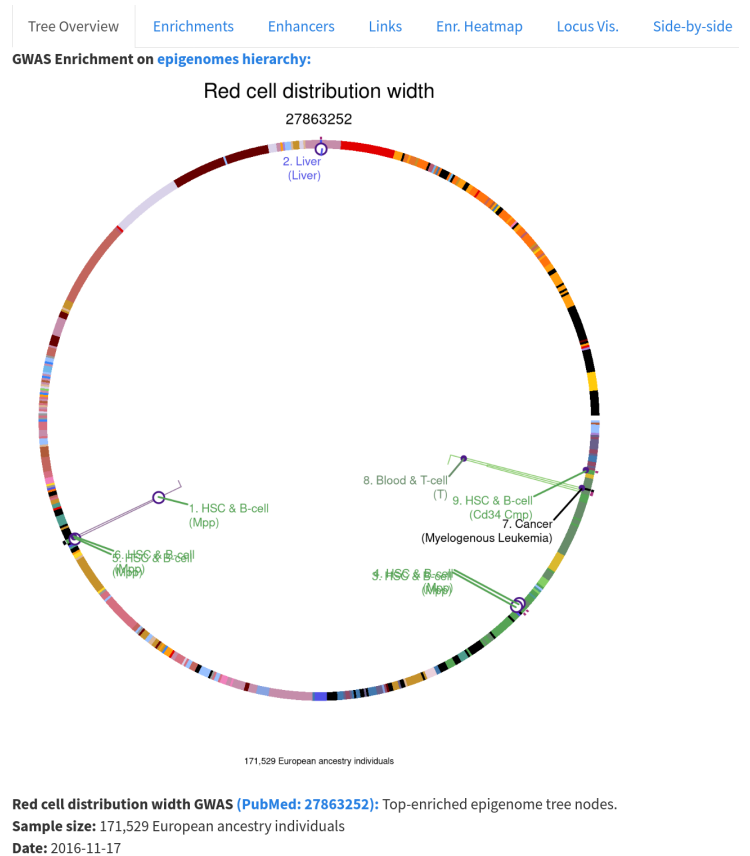

Red cell distribution width GWAS (PubMed: 27863252): Top-enriched epigenome tree nodes and nominal enrichment p-values.  
 Sample size: 171,529 European ancestry individuals  
 Date: 2016-11-17

Show 10 entries Search:

|   | enrRank | enrName              | enr.pValue | pubMedID | trait                       | enrGroup       |
|---|---------|----------------------|------------|----------|-----------------------------|----------------|
| 1 | 1       | Mpp                  | 5e-73      | 27863252 | Red cell distribution width | HSC & B-cell   |
| 2 | 2       | Liver                | 1.9e-66    | 27863252 | Red cell distribution width | Liver          |
| 3 | 3       | Mpp                  | 7.6e-46    | 27863252 | Red cell distribution width | HSC & B-cell   |
| 4 | 4       | Mpp                  | 1.2e-41    | 27863252 | Red cell distribution width | HSC & B-cell   |
| 5 | 5       | Mpp                  | 6.2e-39    | 27863252 | Red cell distribution width | HSC & B-cell   |
| 6 | 6       | Mpp                  | 1.4e-36    | 27863252 | Red cell distribution width | HSC & B-cell   |
| 7 | 7       | Myelogenous Leukemia | 1.5e-31    | 27863252 | Red cell distribution width | Cancer         |
| 8 | 8       | T                    | 1e-29      | 27863252 | Red cell distribution width | Blood & T-cell |
| 9 | 9       | Cd34 Cmp             | 4.3e-28    | 27863252 | Red cell distribution width | HSC & B-cell   |

Showing 1 to 9 of 9 entries Previous 1 Next

Figure S27: d. Example screenshots from interactive browser showing GWAS browsing and enrichments in figure and table view.

Tissue-specific enhancers near GWAS lead SNPs: All enhancers within 2.5kb of a GWAS lead SNP that are also active in one of the top-enriched tree nodes in the GWAS.

Show  entries Search:

|    | chr   | snpPos    | snp.pValue | enhStart  | enhEnd    | distToCenter | nearestGene | enrRank | enrName  | enr.pValue | enrGroup     |
|----|-------|-----------|------------|-----------|-----------|--------------|-------------|---------|----------|------------|--------------|
| 1  | chr1  | 43428757  | 1e-16      | 43429771  | 43430151  | 1204.5       | SLC2A1      | 9       | Cd34 Cmp | 4.3e-28    | HSC & B-cell |
| 2  | chr2  | 60725451  | 8e-21      | 60727115  | 60727295  | 1754.5       | BCL11A      | 9       | Cd34 Cmp | 4.3e-28    | HSC & B-cell |
| 3  | chr8  | 26243136  | 9e-19      | 26243356  | 26243576  | 330.5        | BNIP3L      | 9       | Cd34 Cmp | 4.3e-28    | HSC & B-cell |
| 4  | chr1  | 43428757  | 1e-16      | 43429051  | 43429407  | 472.5        | SLC2A1      | 9       | Cd34 Cmp | 4.3e-28    | HSC & B-cell |
| 5  | chr11 | 205198    | 4e-24      | 202620    | 202880    | 2447.5       | BET1L       | 9       | Cd34 Cmp | 4.3e-28    | HSC & B-cell |
| 6  | chr1  | 3691998   | 1e-17      | 3691784   | 3692024   | 93.5         | SMIM1       | 9       | Cd34 Cmp | 4.3e-28    | HSC & B-cell |
| 7  | chr11 | 44594611  | 1e-21      | 44595064  | 44595290  | 566.5        | CD82        | 9       | Cd34 Cmp | 4.3e-28    | HSC & B-cell |
| 8  | chr8  | 26243136  | 9e-19      | 26244376  | 26244596  | 1350.5       | BNIP3L      | 9       | Cd34 Cmp | 4.3e-28    | HSC & B-cell |
| 9  | chr19 | 1014538   | 1e-12      | 1016279   | 1016819   | 2011.5       | TMEM259     | 9       | Cd34 Cmp | 4.3e-28    | HSC & B-cell |
| 10 | chr1  | 203281175 | 6e-14      | 203279688 | 203279808 | 1426.5       | BTG2        | 9       | Cd34 Cmp | 4.3e-28    | HSC & B-cell |

Showing 1 to 10 of 9,039 entries

Previous      ...  Next

[Download Enhancers](#)

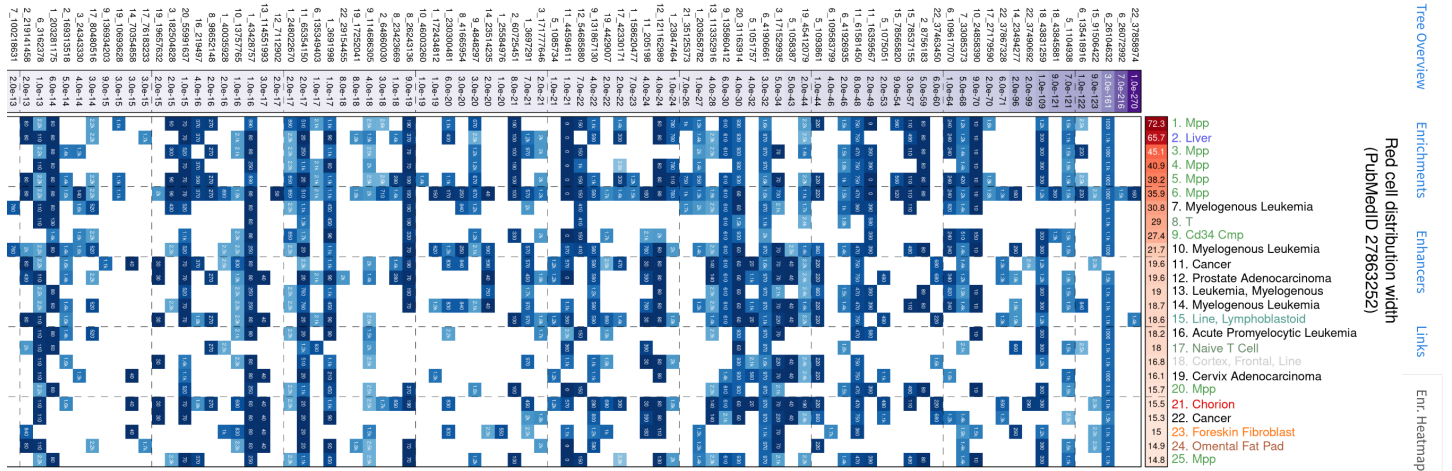

**Figure S27: e.** Example screenshots from interactive browser showing enhancer predictions nearby GWAS SNPs and enhancer versus subtree intersection, showing the closest enhancer to the SNP in each tissue.

**Table of gene-enhancer links:** Gene-enhancer links in the GWAS loci (SNPs +/- 1-Mb), reported for the top-enriched sample groups in the GWAS.

Show 10 entries

Search:

|      | chr  | snpPos   | snp.pValue | distToCenter | nearestGene | linkedGene | linkScore | linkDist | enrRank | enrName | enr.pValue | enrGroup     |
|------|------|----------|------------|--------------|-------------|------------|-----------|----------|---------|---------|------------|--------------|
| 6774 | chr6 | 26104632 | 3e-161     | 1464         | HIST1H4C    | HFE        | 0.89      | 15658.5  | 1       | Mpp     | 5e-73      | HSC & B-cell |
| 6769 | chr6 | 26104632 | 3e-161     | 1621         | HIST1H4C    | HFE        | 0.87      | 15501.5  | 1       | Mpp     | 5e-73      | HSC & B-cell |
| 6764 | chr6 | 26104632 | 3e-161     | 996.5        | HIST1H4C    | HIST1H1T   | 0.36      | -2736    | 1       | Mpp     | 5e-73      | HSC & B-cell |
| 2563 | chr6 | 26104632 | 3e-161     | 1199         | HIST1H4C    | HFE        | 0.84      | 15923.5  | 2       | Liver   | 1.9e-66    | Liver        |
| 2575 | chr6 | 26104632 | 3e-161     | 1060.5       | HIST1H4C    | HFE        | 0.84      | 16062    | 2       | Liver   | 1.9e-66    | Liver        |
| 2759 | chr6 | 26104632 | 3e-161     | 1621         | HIST1H4C    | HFE        | 0.9       | 15501.5  | 3       | Mpp     | 7.6e-46    | HSC & B-cell |
| 2954 | chr6 | 26104632 | 3e-161     | 1199         | HIST1H4C    | HFE        | 0.9       | 15923.5  | 3       | Mpp     | 7.6e-46    | HSC & B-cell |
| 3149 | chr6 | 26104632 | 3e-161     | 1464         | HIST1H4C    | HFE        | 0.89      | 15658.5  | 3       | Mpp     | 7.6e-46    | HSC & B-cell |
| 2804 | chr6 | 26104632 | 3e-161     | 1106.5       | HIST1H4C    | HIST1H1T   | 0.81      | -2626    | 3       | Mpp     | 7.6e-46    | HSC & B-cell |
| 3144 | chr6 | 26104632 | 3e-161     | 996.5        | HIST1H4C    | SLC17A2    | 0.8       | 174674   | 3       | Mpp     | 7.6e-46    | HSC & B-cell |

Showing 1 to 10 of 1,459 entries

Previous 1 2 3 4 5 ... 146 Next

Download Links

Select locus:

chr6:135,418,916 (p=1.0e-122, HBS1L)

Previous Next

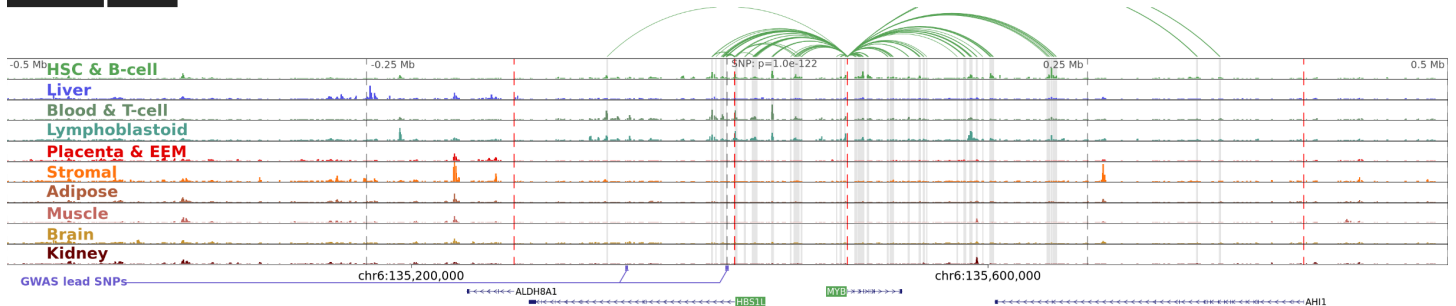

**Locus overview for 1Mb around selected lead SNP:** Tracks show average H3K27ac signal of enhancers in locus, and red dashed lines indicate the TSSes of nearby genes. Two types of correlation-based links are plotted: (1) Links from one of the enhancers near a lead SNP in the enriched epigenomes. (2) Any links in the locus present in at least half of the samples in one of the top sample groups (HSC & B-cell). Genes linked to an enhancer within 2.5kb of a GWAS lead SNP are highlighted and colored according to the sample group with the highest link score. Link data and images for this GWAS are also available from our [data repository](#). Click to enable/disable zoom on locus, scroll to change zoom size.

**Figure S27: f.** Example screenshots from interactive browser showing linking predictions on GWAS SNPs and locus visualization with links, enhancers, and prioritized genes.
