# Supplementary material for: Regulatory genomic circuitry of human disease loci by integrative epigenomics
Source: PubMed Central journal article supplement (PMC7875769; doi:10.1038/s41586-020-03145-z), 2021-02-03
Supplement: 41586_2020_3145_MOESM4_ESM.pdf [file 41586_2020_3145_MOESM4_ESM.pdf]

Waist-hip ratio  
25673412

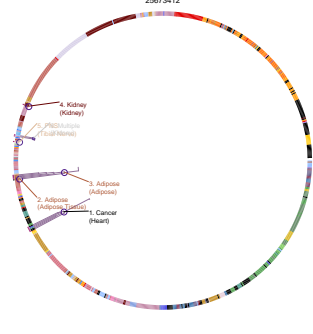

Waist-to-hip ratio adjusted for BMI (joint analysis main effects and smoking interaction)  
264625

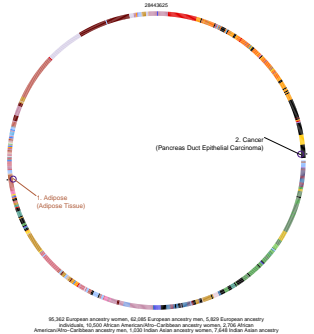

Waist-to-hip ratio adjusted for BMI (joint analysis for main effect and physical activity interaction)  
264625

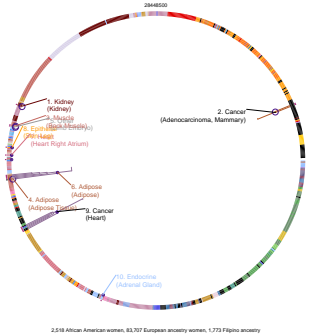

Waist-to-hip ratio adjusted for body mass index  
25673412

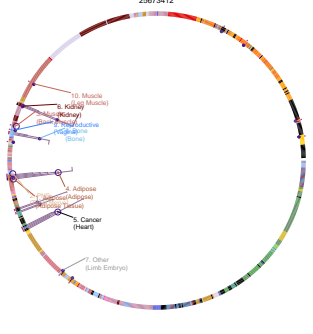

Waist-to-hip ratio adjusted for BMI (adjusted for smoking behaviour)  
264625

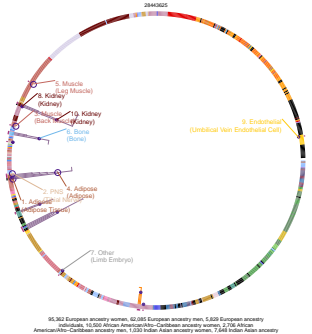

Triglycerides  
29507422

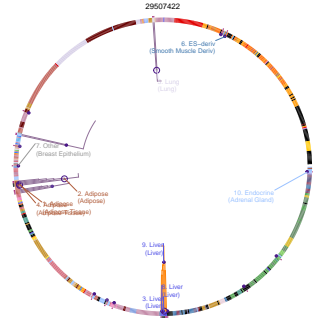

Waist-to-hip ratio adjusted for BMI in non-smokers  
28443625

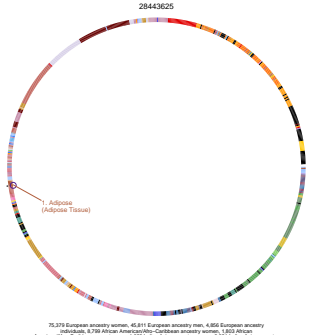

Pulse pressure  
26390057

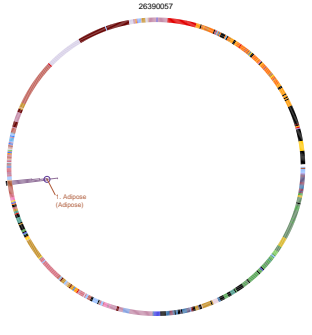

Systolic blood pressure  
27618448

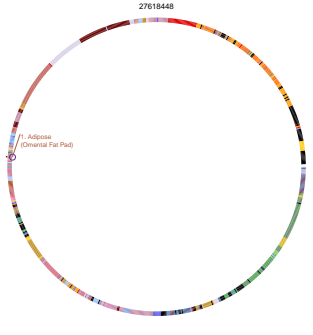

Atrial fibrillation  
28416818

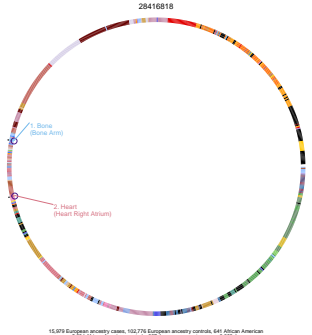

Lung function (FEV1/FVC)  
30595370

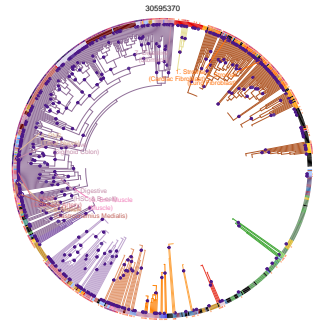

Lung function (FEV1/FVC)  
30804560

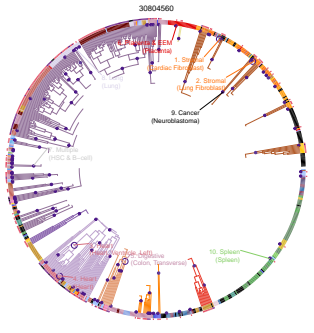

Peak expiratory flow  
30804560

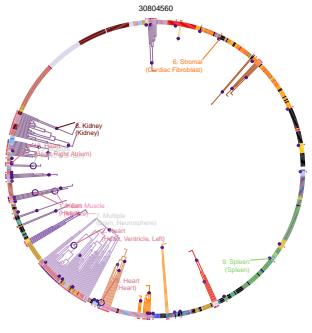

FEV1  
30804560

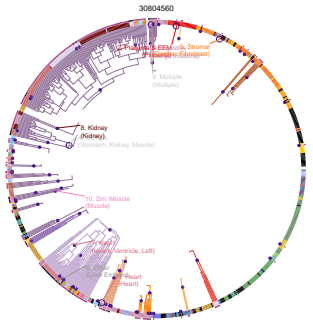

Urinary tract infection frequency  
28284442

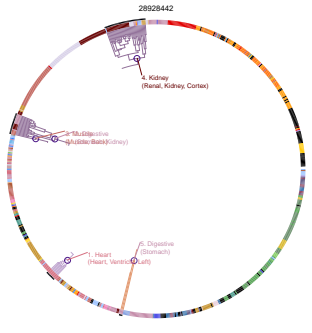

Colorectal cancer  
30529582

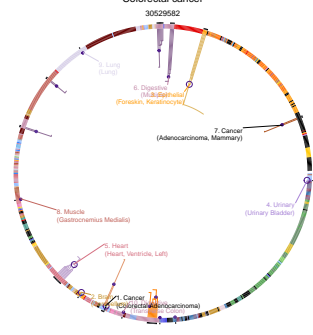

Attention deficit hyperactivity disorder or conduct disorder  
321047 European ancestry individuals

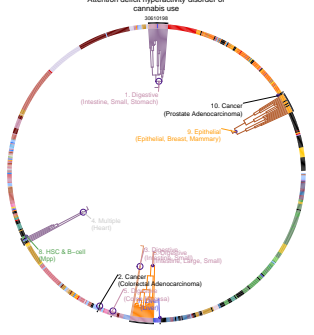

Lumbar spine bone mineral density (integral)  
27476799

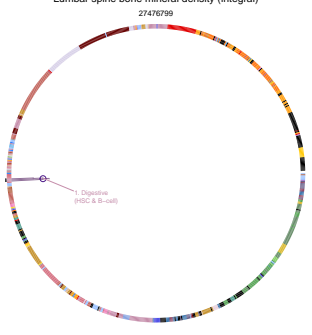

Chronic kidney disease  
26831199

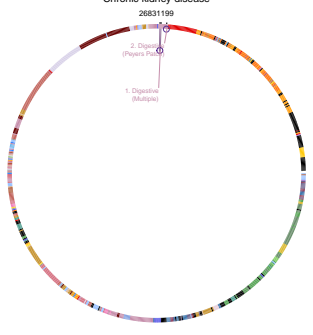

Chronic kidney disease  
20383146

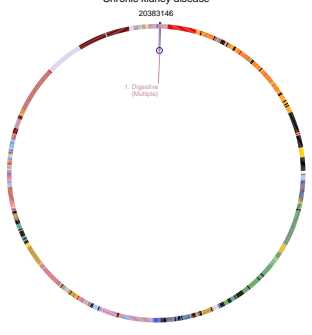

Diastolic blood pressure  
27618448

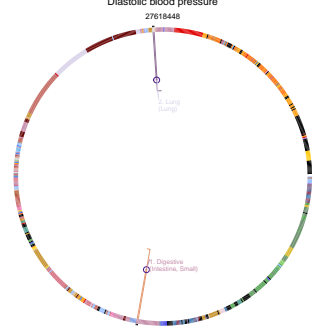

Gallstone disease  
30504769

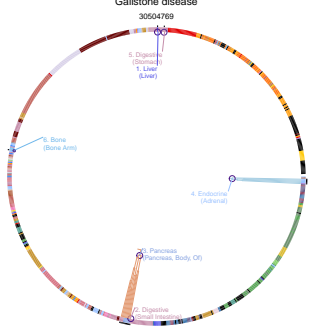

HDL cholesterol x physical activity interaction (2df test)  
11880 European ancestry individuals

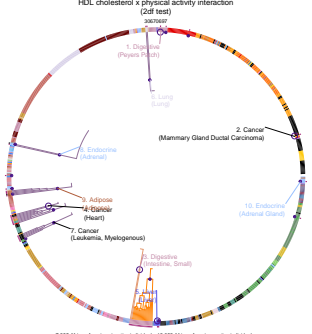

Colorectal cancer  
23266556

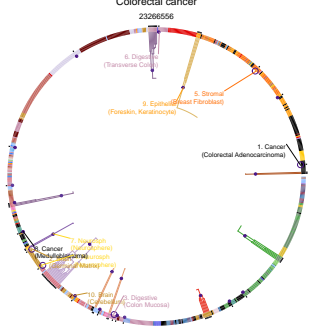

Lung function (FEV1/FVC)  
30061609

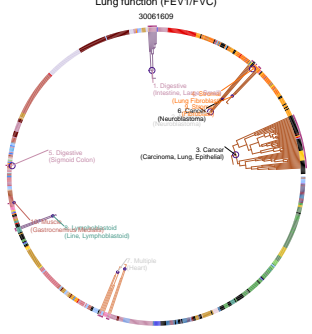

27,174 European ancestry cases, 726,838 European ancestry controls

7,395 African American ancestry individuals, 13,002 African American ancestry individuals, 3,725 Asian ancestry individuals, 1,025 European ancestry individuals, 22,282 European ancestry individuals, 6,338 European ancestry individuals, 2,042 Hispanic or Latin American ancestry individuals, 4,293 Hispanic or Latin American ancestry individuals

12,686 European ancestry colorectal cancer cases, 16,113 European ancestry controls

63,502 European ancestry individuals, 6,629 African individuals, 5,959 Korean ancestry individuals, 11,770 Hispanic individuals





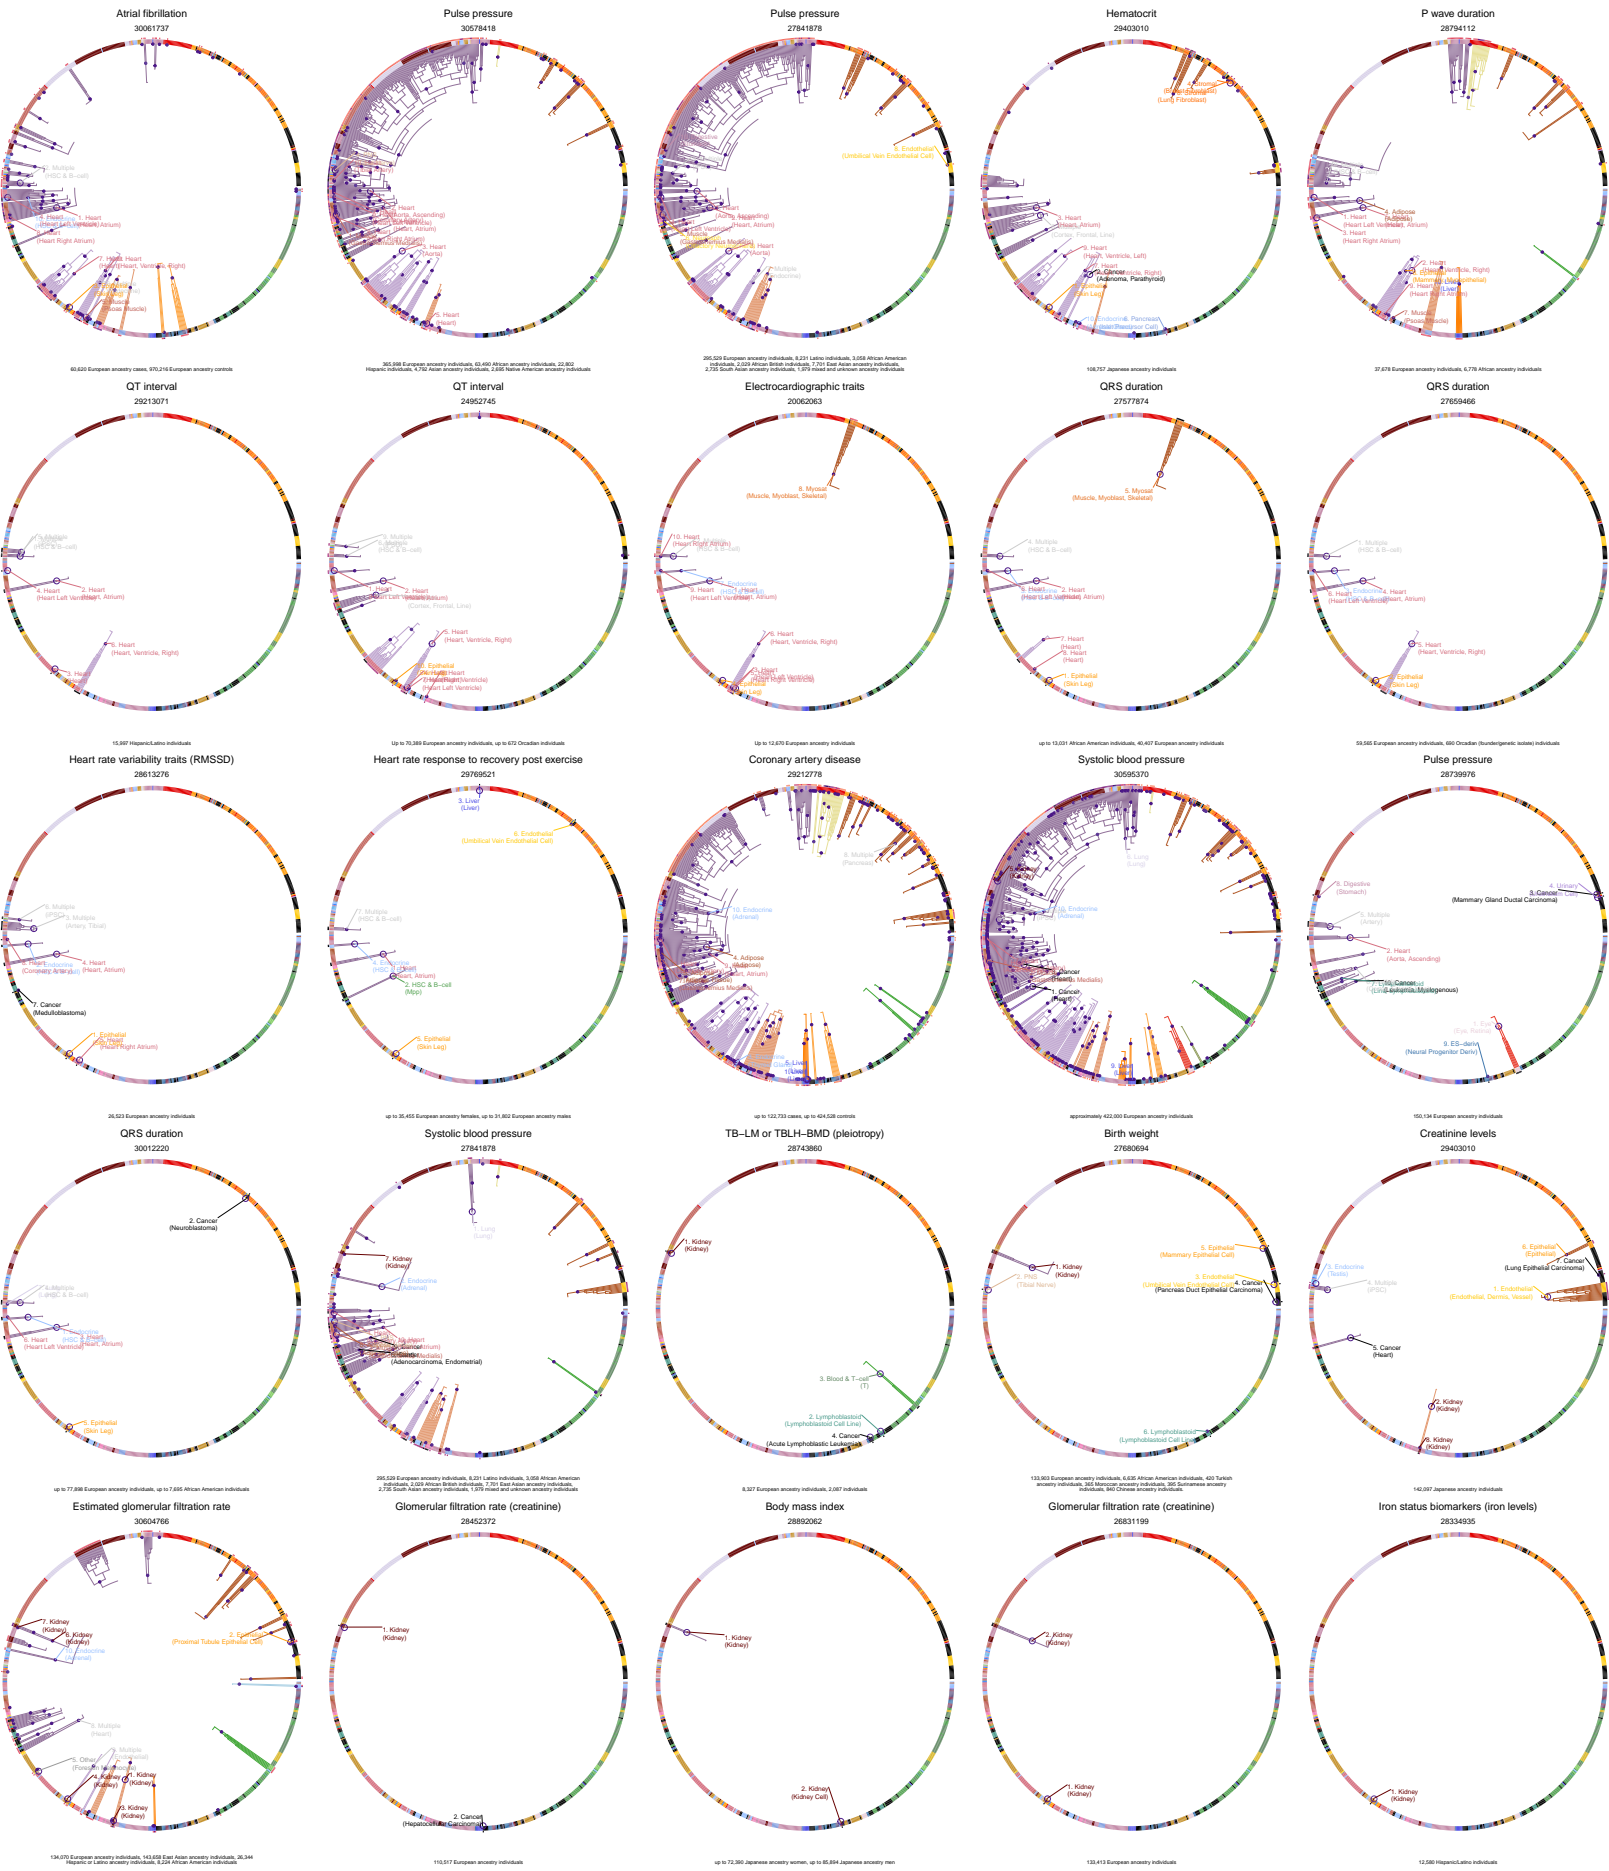





HDL cholesterol

20686565

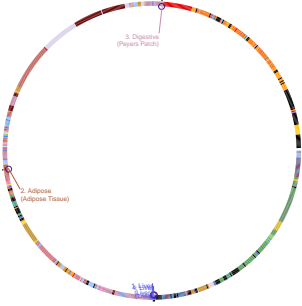

Lipid metabolism phenotypes

19936222

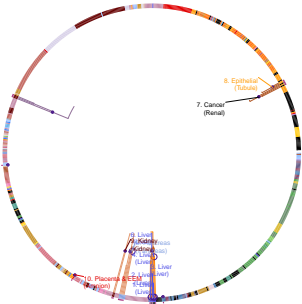

Triglycerides

20686565

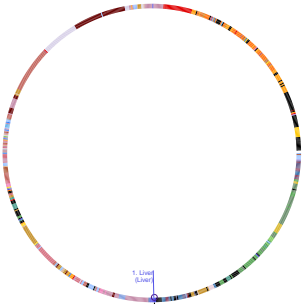

Metabolite levels (lipoprotein measures)

2705778

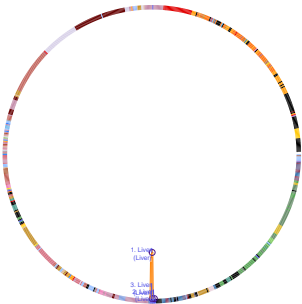

Heel bone mineral density

3048462

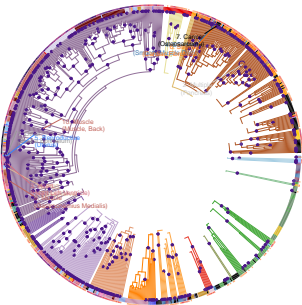

Cholesterol, total

25961943

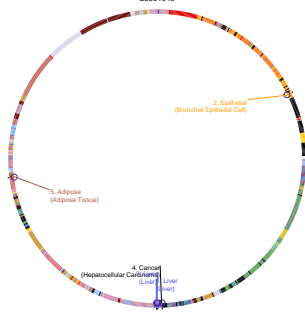

C-reactive protein levels

30388399

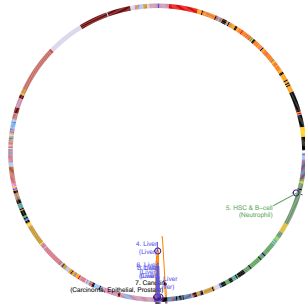

C-reactive protein levels

2130955

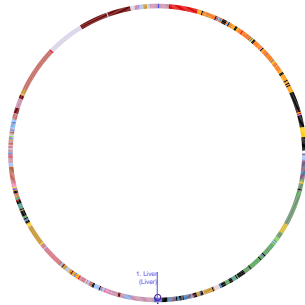

Liver enzyme levels (gamma-glutamyl transferase)

22001757

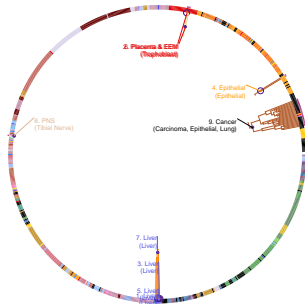

Intraocular pressure

29785010

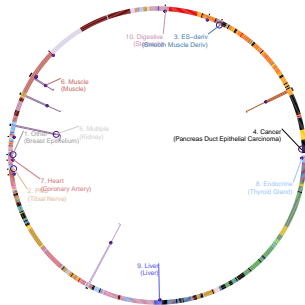

Total cholesterol levels

28334899

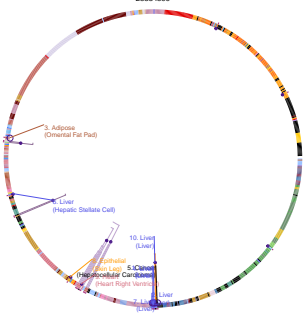

Alcohol consumption (drinks per week)

30643258

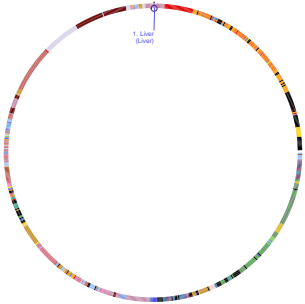

Coronary heart disease

21378990

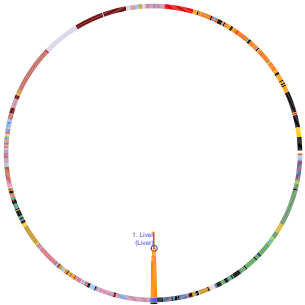

Insomnia symptoms (never/rarely vs. usually)

30804566

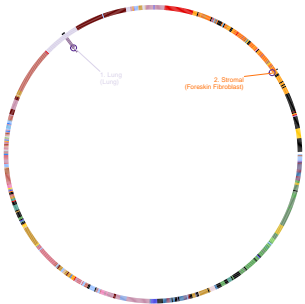

Coronary artery disease

26343387

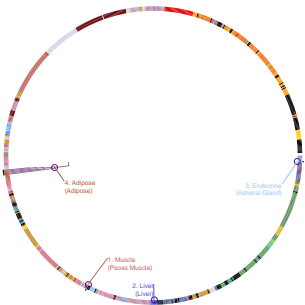

40,000 European ancestry cases, 501 African American cases, 758 Hispanic American cases, 13,500 South Asian ancestry cases, 1,802 African ancestry cases, 1,514 East Asian ancestry cases, 90,121 European ancestry controls, 2,779 African American controls, 2,337 Hispanic American controls, 10,942 South Asian ancestry controls, 461 unknown ancestry controls, 17,306 total ancestry controls

Total cholesterol levels

30275531

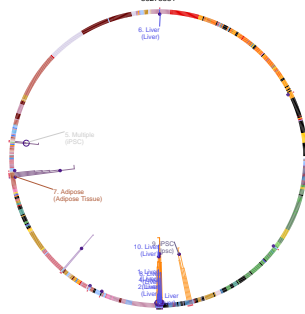

Hand grip strength

29691431

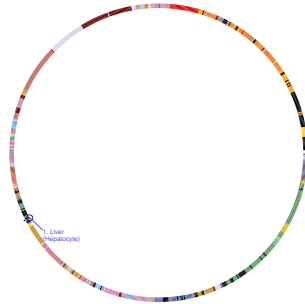

Triglycerides

24097058

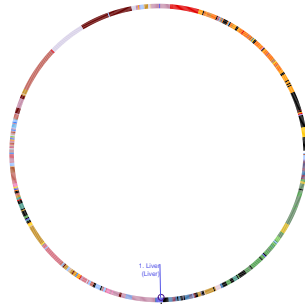

Male-pattern baldness

29146897

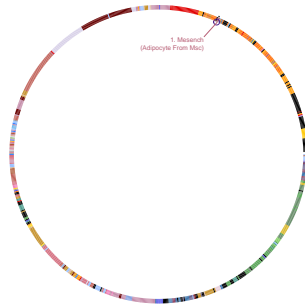

Urinary albumin-to-creatinine ratio in non-diabetics

26631737

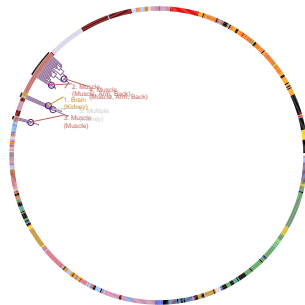

Urinary albumin-to-creatinine ratio in non-diabetics

up to 46,651 European ancestry individuals

Low density lipoprotein cholesterol levels

29403010

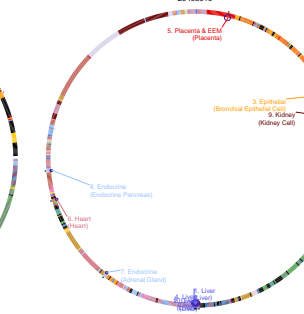

Aspartate aminotransferase levels

29403010

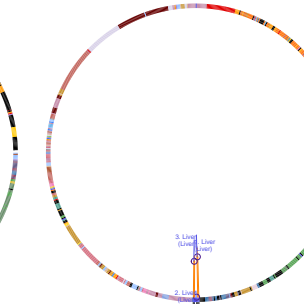

Advanced age-related macular degeneration

26691988

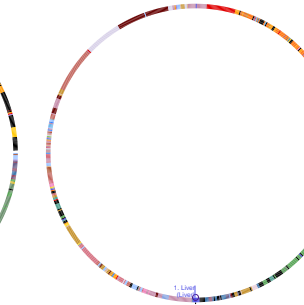

Heel bone mineral density

30953370

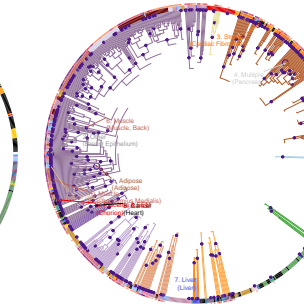

Lipoprotein phospholipase A2 activity in cardiovascular disease

30953370

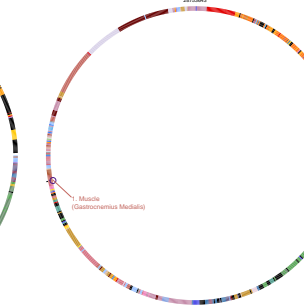

Lipoprotein phospholipase A2 activity in cardiovascular disease

22,156 European, Asian, African, Indian, Native American, Pacific Islander and other ancestry

Invasive epithelial ovarian cancer  
28346442

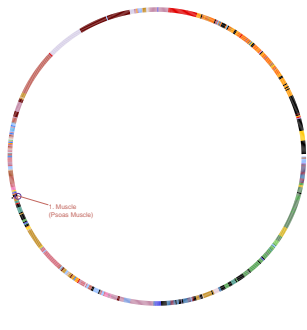

Epithelial ovarian cancer  
28346442

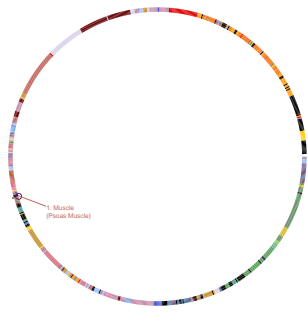

High-grade serous ovarian cancer  
28346442

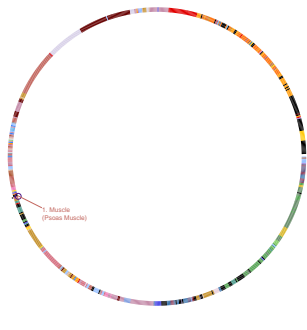

Serous invasive ovarian cancer  
28346442

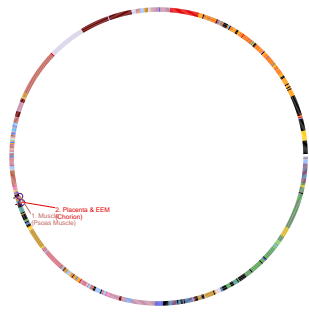

Central corneal thickness  
29760442

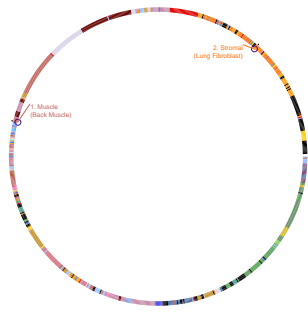

Corneal structure  
23291589

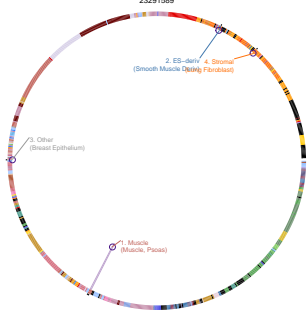

Pneumonia  
28928442

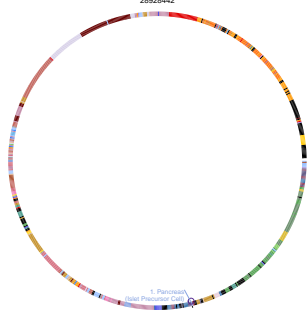

Lung function (FEV1/FVC)  
29166213

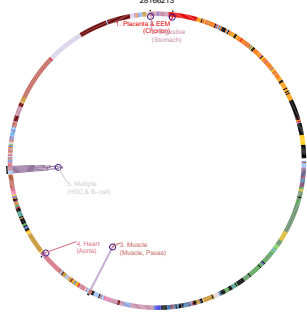

LDL cholesterol  
20864672

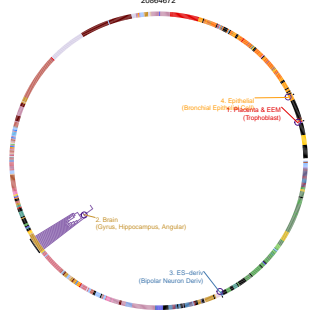

Cholesterol, total  
19060911

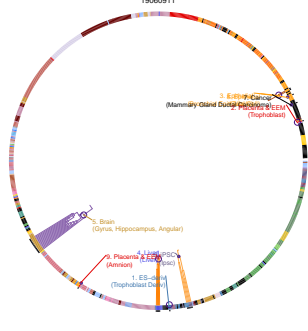

Triglycerides  
15005006

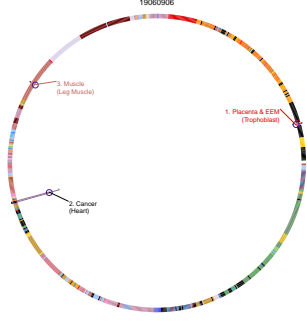

Smoking status  
30595370

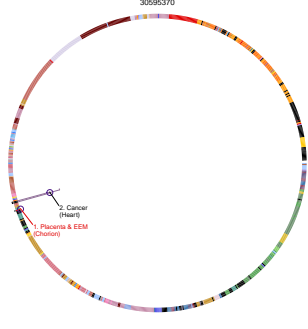

C-reactive protein levels or LDL-cholesterol levels (heterozygous)  
272600

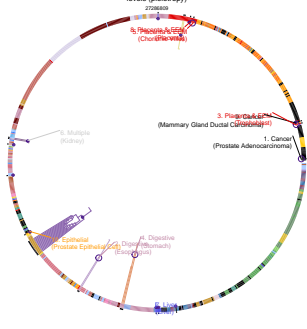

Perceived unattractiveness to mosquitoes  
28199695

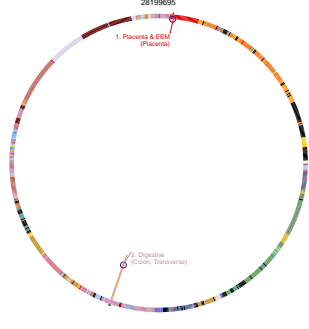

Refractive astigmatism  
30306274

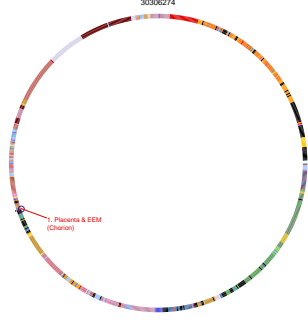

Urinary albumin excretion (no hypertensive medication)  
30220432

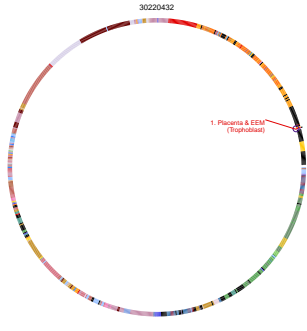

Prothrombin time  
29403010

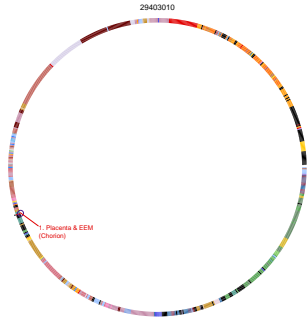

Breast cancer  
23535729

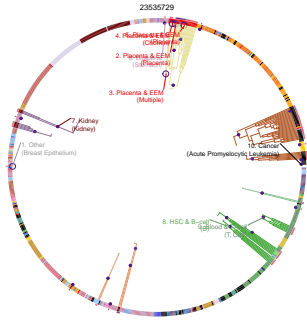

Breast cancer  
25751625

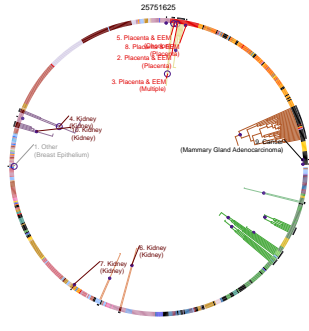

HDL cholesterol  
20864672

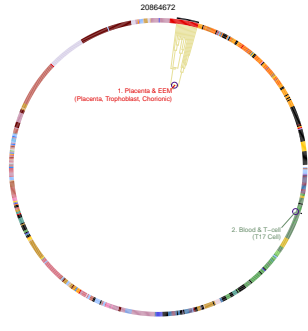

Balding type 1  
30595370

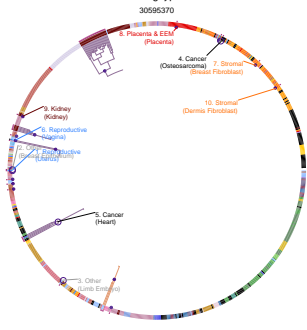

Lobe attachment (rate-scored or self-reported)  
29198719

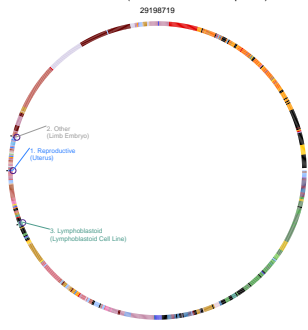

Smoking cessation (MTAG)  
30643251

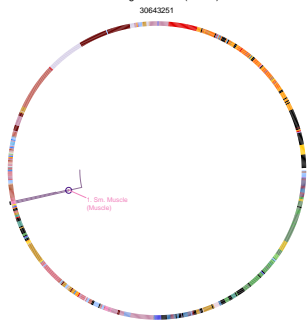

Diastolic blood pressure  
21909115

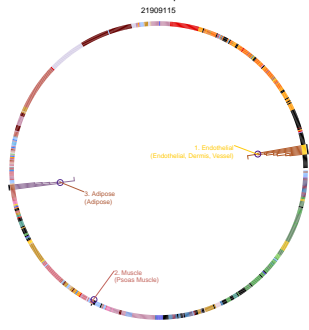

Positive affect  
30643256

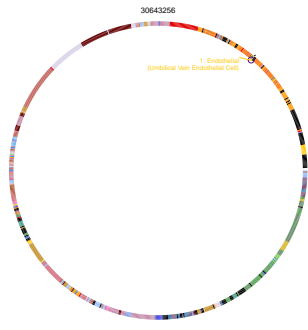

approximately 208,000 European ancestry individuals

65,741 European ancestry individuals, 1,562 Hispanic individuals, 2,857 Han Chinese ancestry individuals

up to 653,102 European ancestry individuals

69,392 European ancestry individuals

410,683 European ancestry individuals

Type 2 diabetes  
30054458

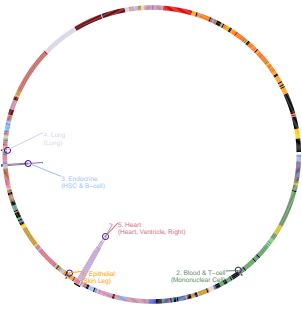

61,714 European ancestry cases, 1,175 Pakistani ancestry cases, 283,962 European ancestry controls, 2,475 Pakistani ancestry controls

LDL cholesterol  
19060911

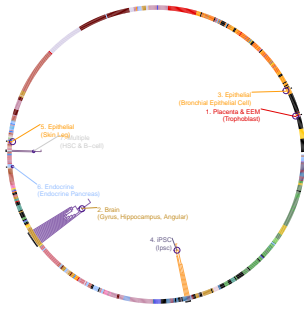

17,085 European ancestry individuals, 714 Icelandic individuals

LDL cholesterol x physical activity interaction  
(all test)  
2279727

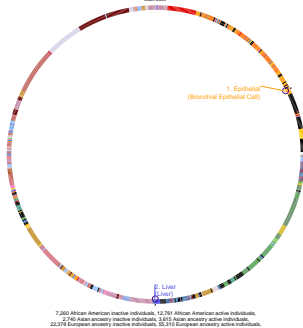

7,260 African American inactive individuals, 12,761 African American active individuals, 22,172 African American inactive individuals, 24,725 African American active individuals, 2,763 Hispanic or Latin American inactive individuals, 5,481 Hispanic or Latin American active individuals

Renal function-related traits (BUN)  
2279727

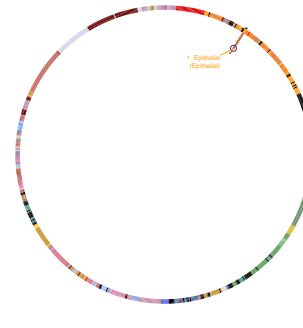

26,717 East Asian ancestry individuals

Blood pressure  
21909110

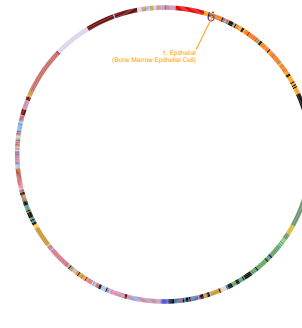

74,064 European ancestry individuals

Systolic blood pressure  
28135244

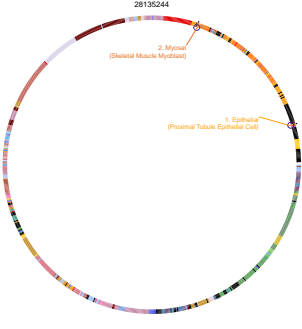

143,882 European ancestry individuals

Life satisfaction  
27089181

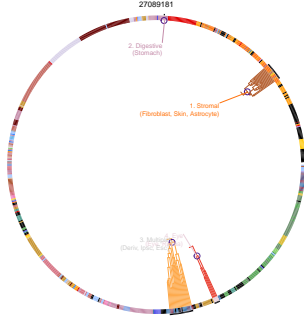

162,205 European ancestry individuals

Pulse pressure  
30224653

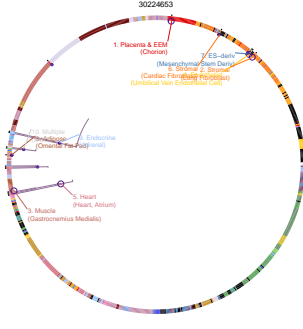

727,401 European ancestry individuals

Intraocular pressure  
29235454

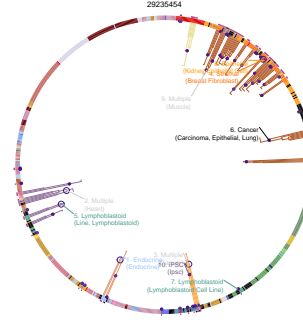

56,819 European ancestry individuals, 5,746 Hispanic/Latino individuals, 6,119 East Asian ancestry individuals, 2,079 African ancestry individuals

Body fat distribution (leg fat ratio)  
30664634

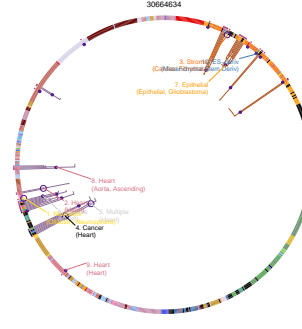

52,035 British ancestry males, 61,122 British ancestry females

QRS interval (sulfonurea treatment interaction)  
27956371

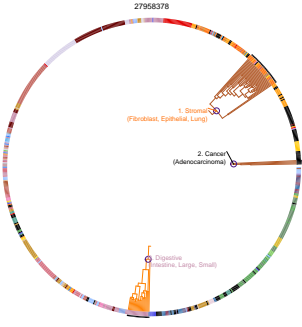

2,095 European ancestry unpaired individuals, 4,307 European ancestry unpaired individuals, 1,127 African American unpaired individuals, 10,744 African American unpaired individuals, 14,102 European ancestry unpaired individuals, 14,102 African American unpaired individuals, 7,709 East Asian ancestry unpaired individuals

Myocardial infarction  
26343987

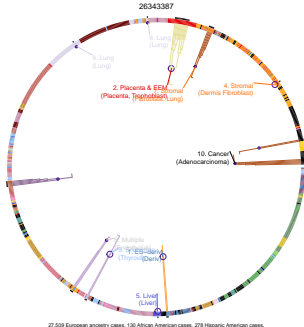

27,529 European ancestry cases, 120 African American cases, 278 Hispanic American cases, 10,207 South Asian ancestry cases, 288 Latin American cases, 1,487 East Asian ancestry cases, 10,115 European ancestry controls, 2,776 African ancestry controls, 1,377 Hispanic American ancestry controls, 14,102 African American ancestry controls, 7,709 East Asian ancestry controls

Lumbar spine bone mineral density  
2949814

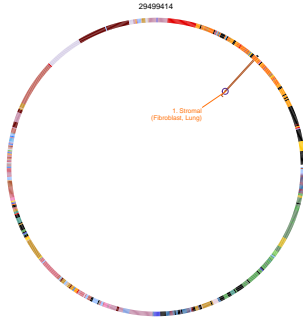

up to 4,882 European ancestry individuals, up to 1,120 Han Chinese ancestry individuals, up to 6,046 African ancestry individuals, up to 9,169 Hispanic ancestry, up to 68 European ancestry non-genotype imputed individuals, 35,524 European ancestry non-genotype imputed individuals

Neuroticism  
29292987

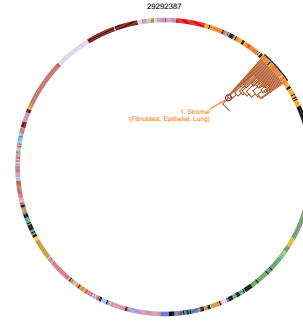

168,105 European ancestry individuals

Myopia  
27182965

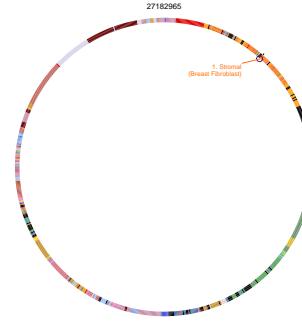

108,008 European ancestry cases, 85,727 European ancestry controls

Glaucoma  
30054594

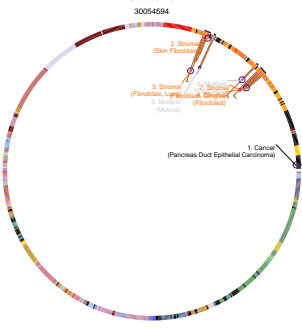

11,018 European ancestry cases, 136,068 European ancestry controls

Potassium levels  
29403010

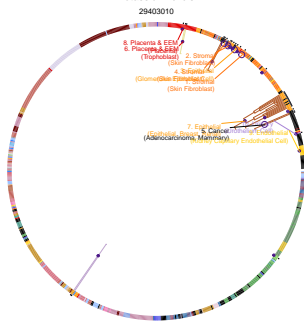

132,228 European ancestry individuals

Intraocular pressure  
29617998

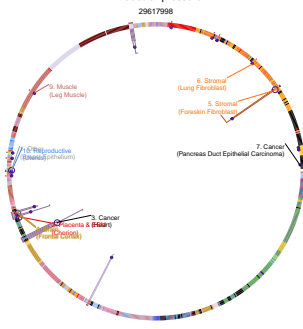

115,466 European ancestry individuals

Allergic disease (asthma, hay fever or eczema)  
29785011

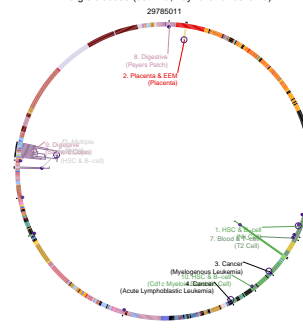

25,685 European ancestry allergic disease cases, 74,768 European ancestry controls

Asthma or allergic disease (pleiotropy)  
29785011

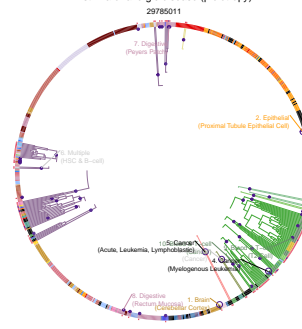

14,085 European asthma cases, 25,685 European ancestry allergic disease cases, 74,768 European ancestry controls

Platelet count  
26805783

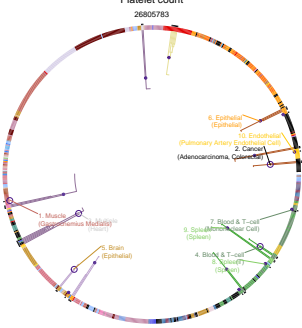

12,481 Hispanic/Latin American individuals

Post bronchodilator FEV1  
26634245

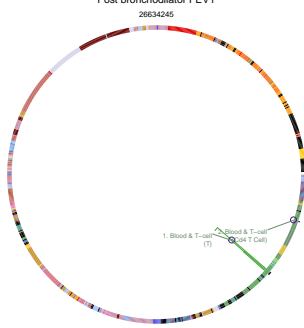

16,094 European ancestry current and former smoker individuals, 1,260 African American current and former smoker individuals, 174 current and former smoker individuals

Hypertension  
21909115

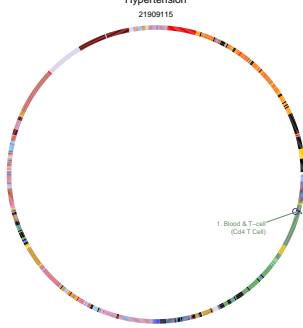

63,365 European ancestry individuals

Hematological and biochemical traits  
20139978

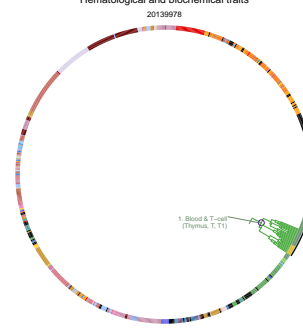

Up to 14,402 Japanese individuals

Hypothyroidism  
27182965

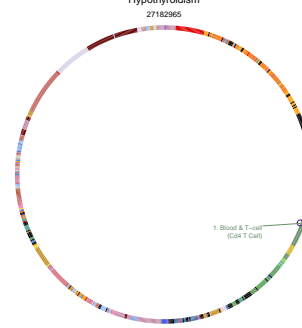

17,558 European ancestry cases, 117,683 European ancestry controls



Measles

28928442

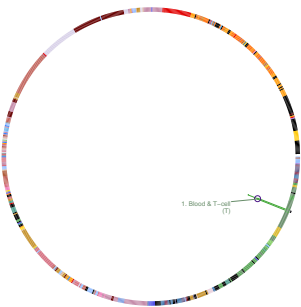

Lymphocyte counts

29403010

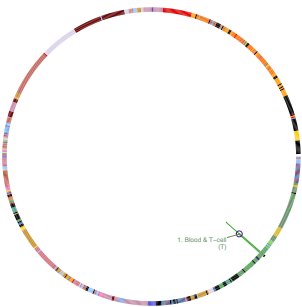

Menopause (age at onset)

26414677

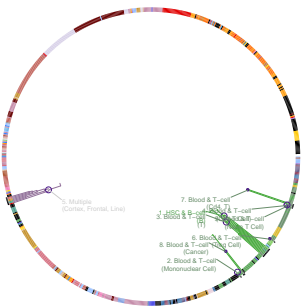

Rheumatoid arthritis

23143596

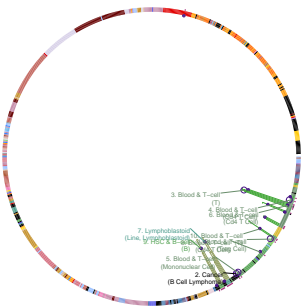

Hip shape (DXA scan)

30320955

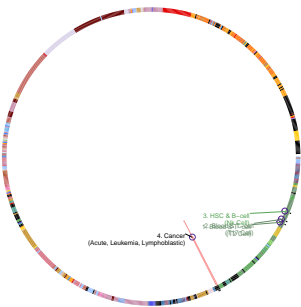

36,219 European ancestry cases, 47,276 European ancestry controls

Celiac disease

22057235

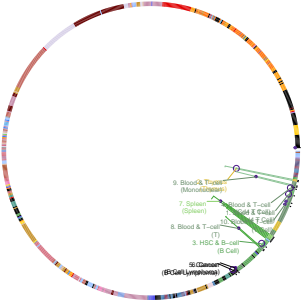

62,076 Japanese ancestry individuals

Rheumatoid arthritis

24390342

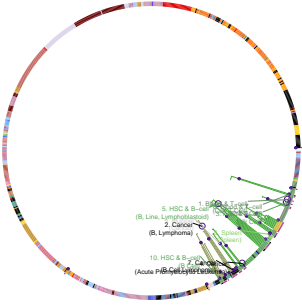

up to 69,626 European ancestry women

Rheumatoid arthritis (ACPA-positive)

24532676

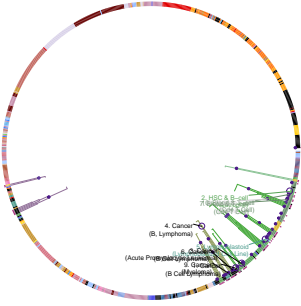

up to 13,828 European ancestry cases, up to 33,740 European ancestry controls

Systemic lupus erythematosus

28714469

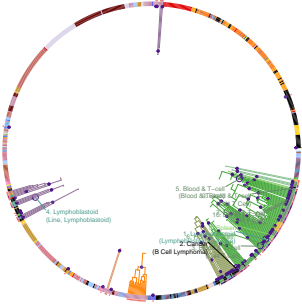

10,217 European ancestry individuals, 5,717 individuals

Mosquito bite size

28199695

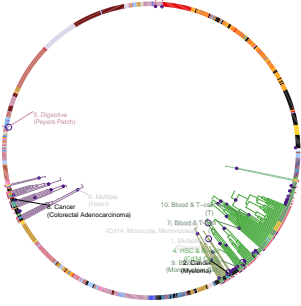

11,812 European ancestry cases, 23 Indian ancestry cases, 11,807 European ancestry controls, 20 Indian ancestry controls

Inflammatory bowel disease

20057509

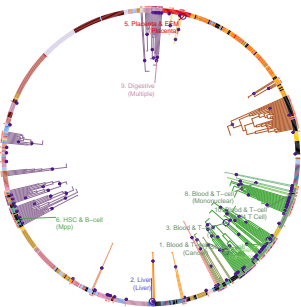

up to 14,261 European ancestry cases, up to 42,022 European ancestry controls, up to 1,875 Indian ancestry cases, up to 11,562 Indian ancestry controls

Chronic inflammatory diseases (ankylosing spondylitis, Crohn's disease, psoriasis, primary sclerosing cholangitis, ulcerative colitis) (genetically shared)

26152919

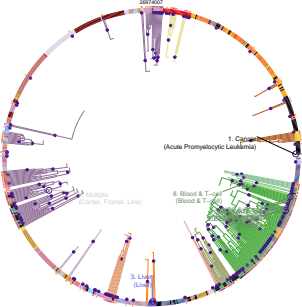

2,234 Korean ancestry cases, 7,065 Korean ancestry controls, 12,286 European ancestry cases, 32,523 European ancestry controls

Inflammatory bowel disease

26152919

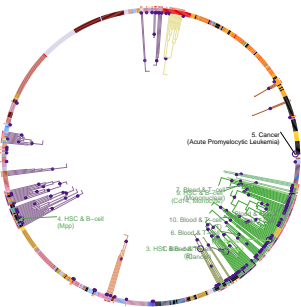

4,746 European ancestry cases, 11,516 European ancestry controls, 2,270 African American cases, 3,432 African American controls, 1,072 Hispanic cases, 2,016 Hispanic controls

Crohn's disease

28037509

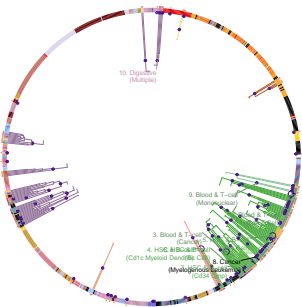

64,724 European ancestry individuals

Inflammatory bowel disease

23123233

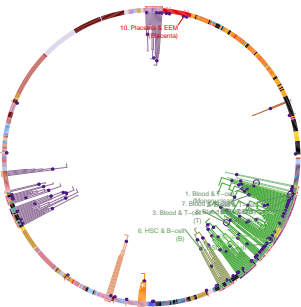

25,042 European and unknown ancestry cases, 34,915 European and unknown ancestry controls

Alzheimer's disease (late onset)

30617256

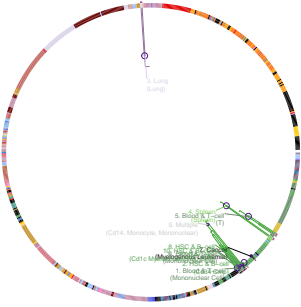

9,726 European ancestry ankylosing spondylitis cases, 10,085 European ancestry Crohn's disease cases, 6,020 Korean ancestry Crohn's disease cases, 3,432 European ancestry primary sclerosing cholangitis cases, 10,072 European ancestry Crohn's disease cases, 10,072 European ancestry Crohn's disease cases, 10,072 European ancestry Crohn's disease cases

Mean corpuscular hemoglobin concentration

28017375

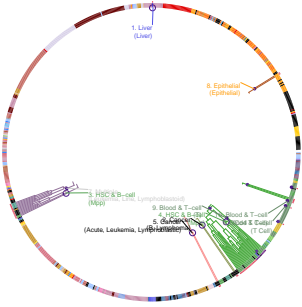

12,882 European ancestry cases, 21,770 European ancestry controls

Lymphocyte counts

27863252

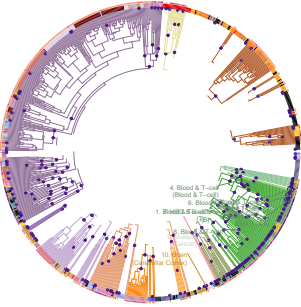

12,114 European and unknown ancestry cases, 26,072 European and unknown ancestry controls

Respiratory diseases

30595370

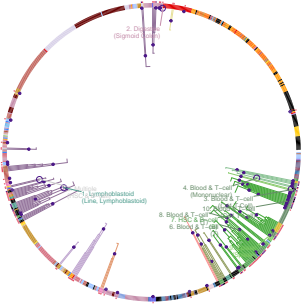

12,824 European ancestry cases, 21,442 European ancestry controls

Lymphocyte percentage of white cells

27863252

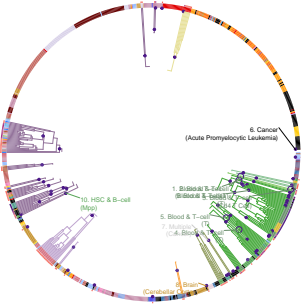

14,387 European ancestry cases, 55,058 European ancestry controls

Autoimmune traits

30595370

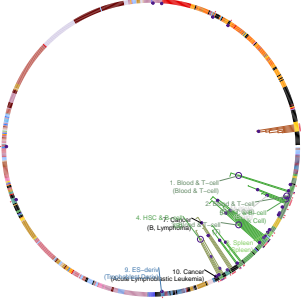

up to 21,020 European ancestry individuals, up to 3,821 African American individuals, up to 11,642 East Asian individuals

Hypothyroidism

30595370

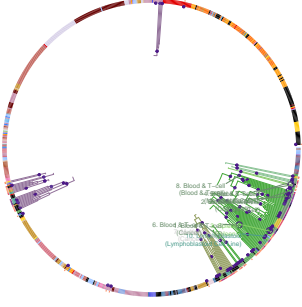

171,643 European ancestry individuals

Multiple sclerosis

24076602

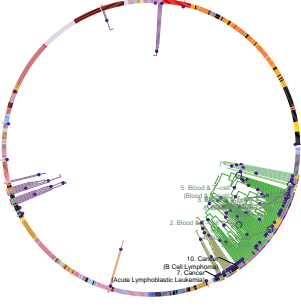

approximately 450,000 European ancestry individuals

Eczema

30595370

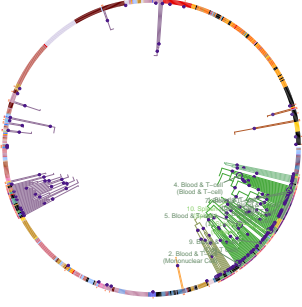

171,748 European ancestry individuals

Allergic disease (asthma, hay fever or eczema)

29083406

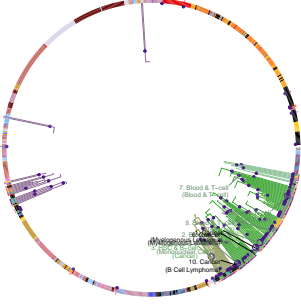

approximately 450,000 European ancestry individuals

approximately 450,000 European ancestry individuals

14,498 European ancestry cases, 34,091 European ancestry controls

approximately 450,000 European ancestry individuals

183,128 European ancestry cases, 183,708 European ancestry controls

Eosinophil counts

30595370

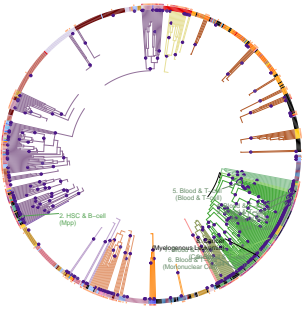

approximately 44,000 European ancestry individuals

Neutrophil percentage of granulocytes

27863252

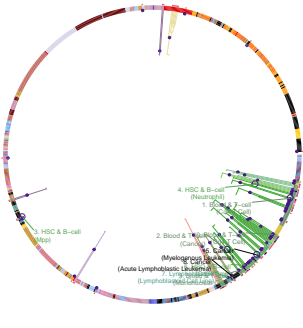

170,472 European ancestry individuals

Eosinophil percentage of white cells

27863252

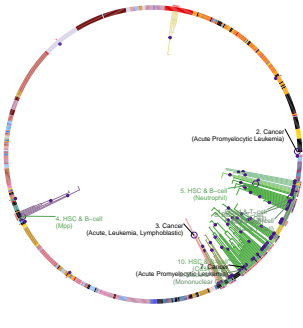

173,378 European ancestry individuals

Eosinophil percentage of granulocytes

27863252

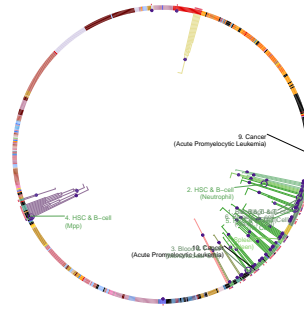

170,536 European ancestry individuals

Sum eosinophil basophil counts

27863252

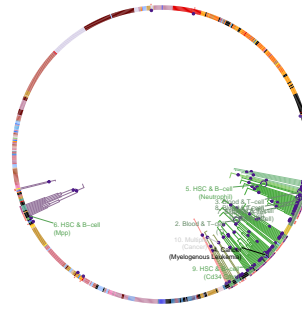

171,771 European ancestry individuals

Eosinophil counts

27863252

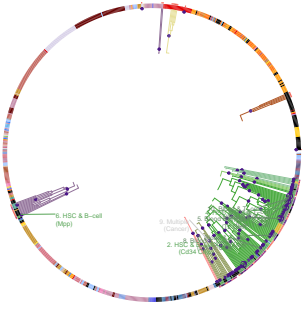

132,375 European ancestry individuals

Asthma

29273806

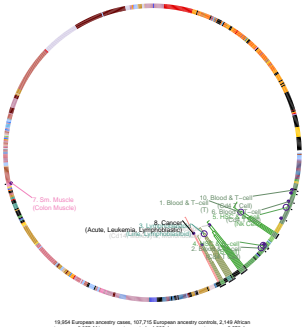

16,564 European ancestry cases, 107,716 European ancestry controls, 2,149 African ancestry cases, 145,628 African ancestry controls, 1,232 Hispanic ancestry cases, 675 Hispanic ancestry controls, 10,200 European ancestry controls

Height

23563607

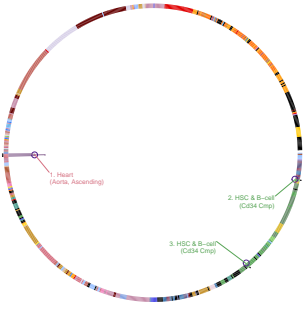

8,307 European ancestry tall individuals, 6,000 European ancestry short individuals

Triglyceride levels

28334899

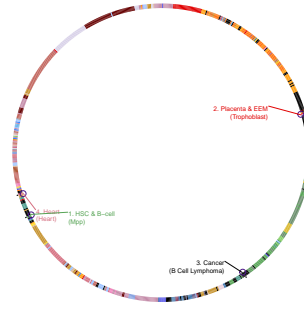

26,140 East Asian ancestry individuals, 171,861 European ancestry individuals

Tonsillectomy

27182965

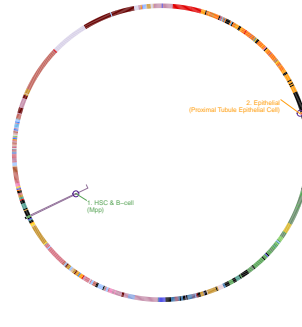

60,008 European ancestry cases, 133,233 European ancestry controls

Granulocyte count

27863252

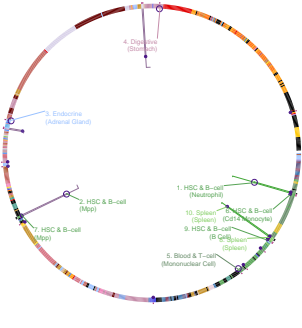

163,832 European ancestry individuals

Sum basophil neutrophil counts

27863252

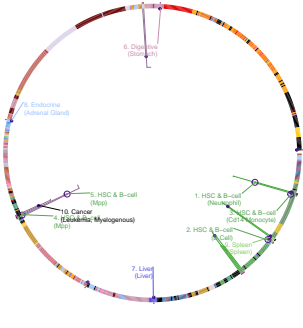

170,143 European ancestry individuals

Neutrophil count

27863252

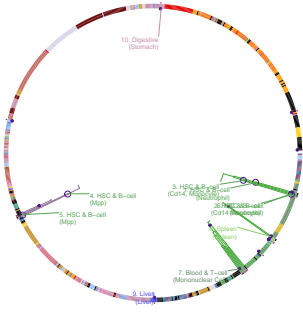

170,702 European ancestry individuals

Sum neutrophil eosinophil counts

27863252

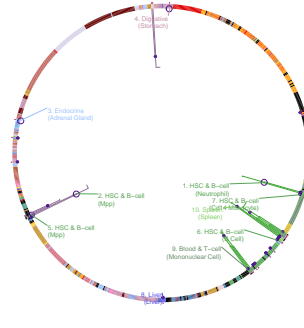

170,384 European ancestry individuals

Menopause (age at onset)

22267201

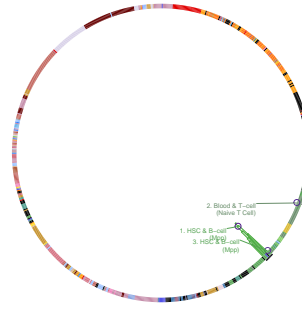

60,008 European ancestry cases, 133,233 European ancestry controls

Family history of Alzheimer's disease

30617256

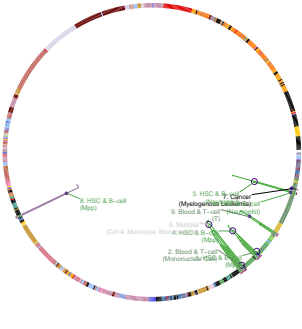

47,793 European ancestry cases, 338,320 European ancestry controls

Basophil percentage of granulocytes

27863252

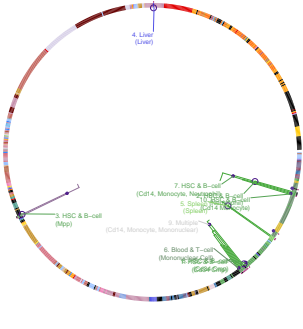

170,223 European ancestry individuals

Red blood cell count

28017375

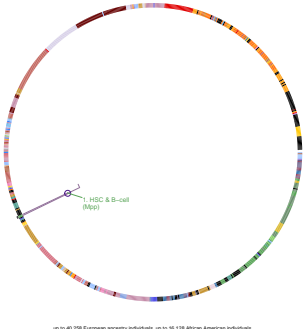

46,1228 European ancestry individuals, 46,119,128 African American individuals, 46,119,128 East Asian individuals

Vascular endothelial growth factor levels

26910538

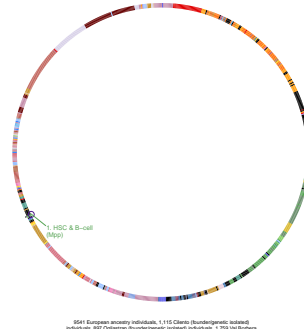

5541 European ancestry individuals, 1,115 Chinese (Han) ancestry individuals, 587 Japanese (Shiga) ancestry individuals, 1759 US-born individuals, 1759 US-born individuals

Triglycerides

25961943

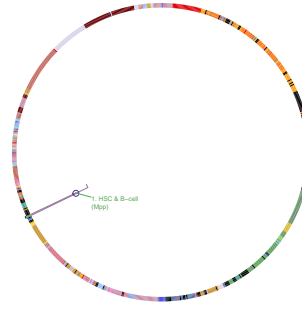

46,119,128 European ancestry individuals

Atopic dermatitis

26482879

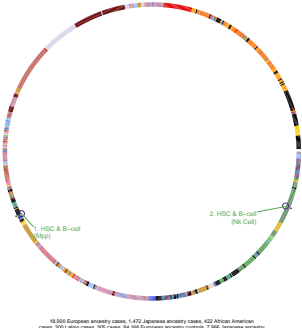

18,300 European ancestry cases, 1,477 Japanese ancestry cases, 422 African American cases, 180,000 European ancestry controls, 100,000 African American ancestry controls, 200,000 European ancestry controls, 100,000 African American ancestry controls, 100,000 European ancestry controls, 100,000 African American ancestry controls

Cancer (pleiotropy)

27197191

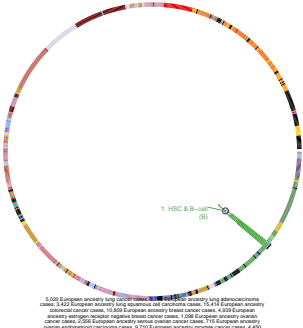

5,000 European ancestry tall individuals, 5,000 European ancestry short individuals, 5,000 European ancestry tall individuals, 5,000 European ancestry short individuals, 5,000 European ancestry tall individuals, 5,000 European ancestry short individuals, 5,000 European ancestry tall individuals, 5,000 European ancestry short individuals, 5,000 European ancestry tall individuals, 5,000 European ancestry short individuals

Loneliness (linear analysis)

27629369

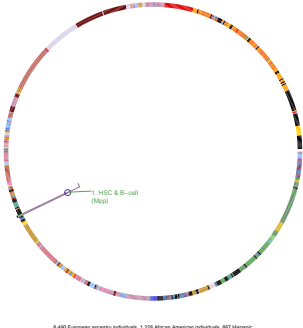

8,490 European ancestry individuals, 1,208 African American individuals, 807 Hispanic American individuals, 175 individuals

Shingles

28928442

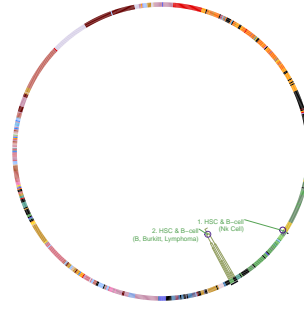

16,711 European ancestry cases, 118,152 European ancestry controls

Basophil percentage of white cells

27863252

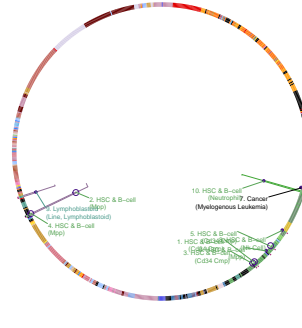

171,086 European ancestry individuals

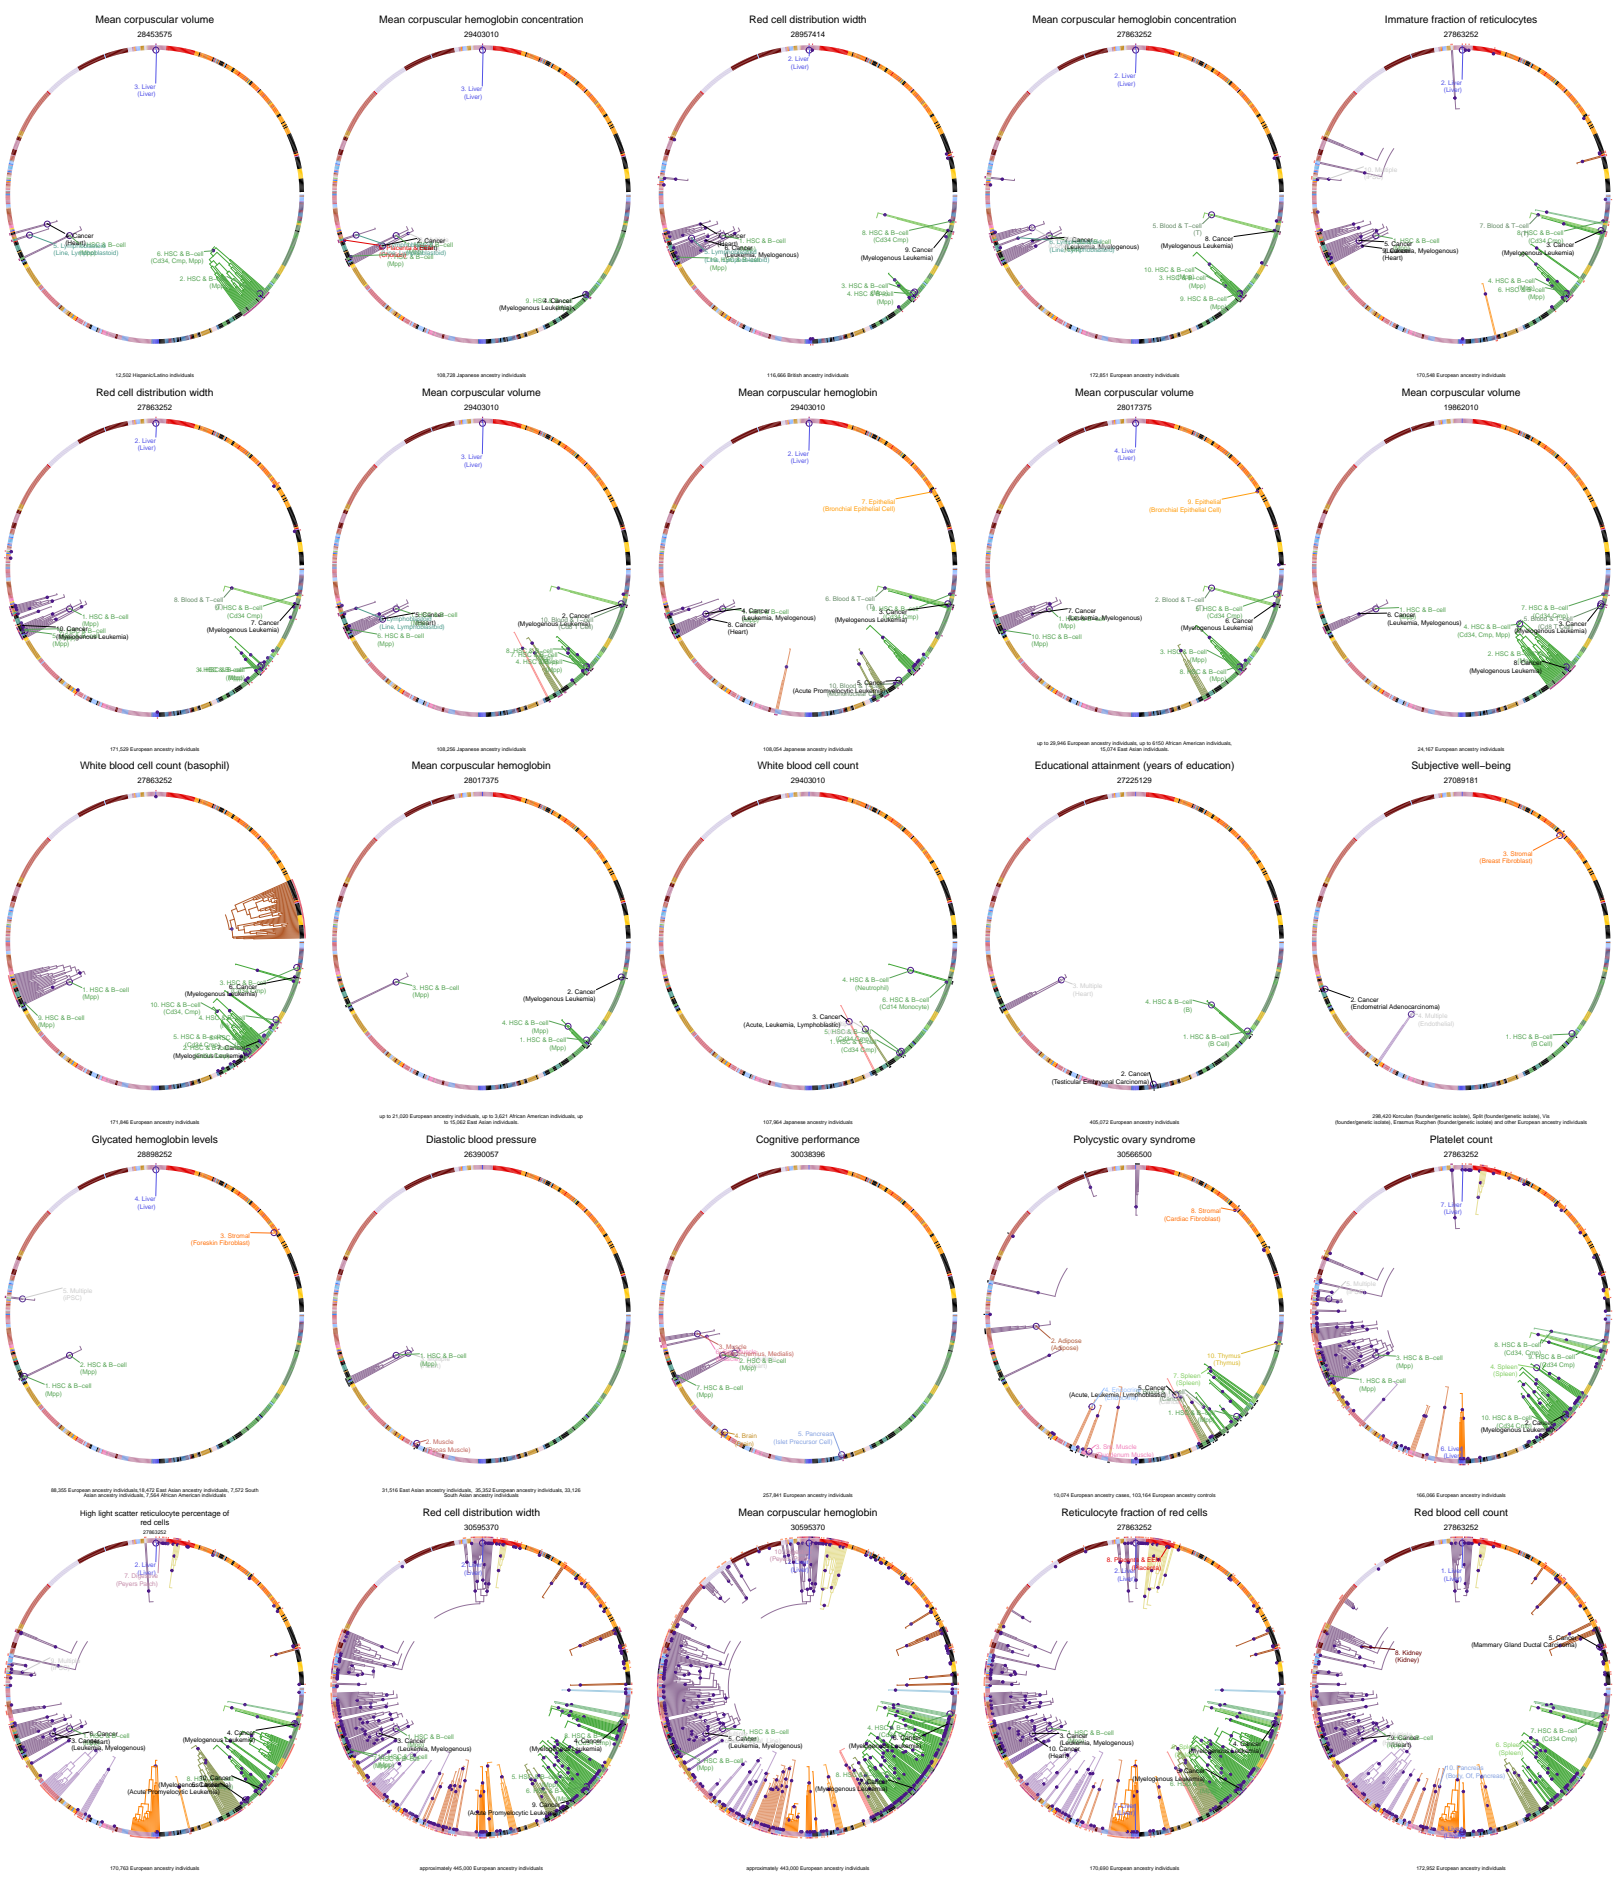



Plateletcrit

27863252

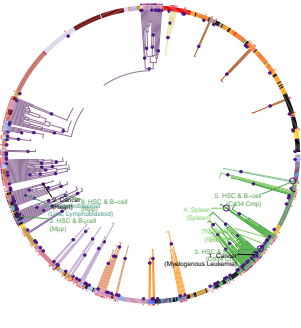

Mean platelet volume

27863252

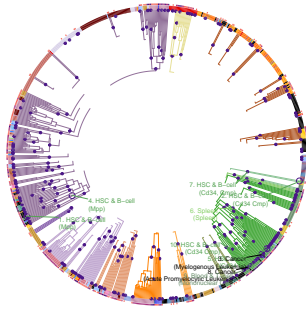

Platelet distribution width

27863252

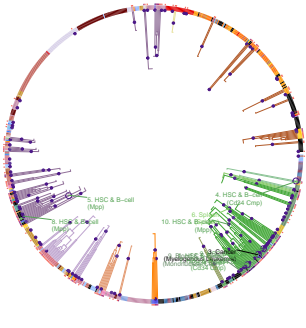

Ankylosing spondylitis

23749187

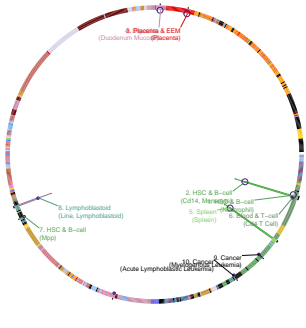

Ulcerative colitis

28067908

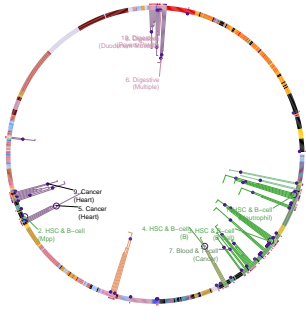

Alzheimer's disease or family history of Alzheimer's disease

29403010

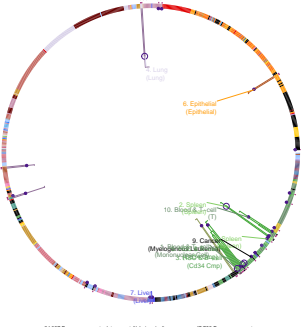

Albumin-globulin ratio

29403010

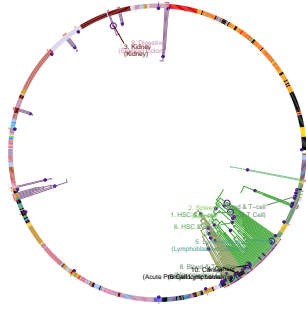

Self-reported allergy

23817569

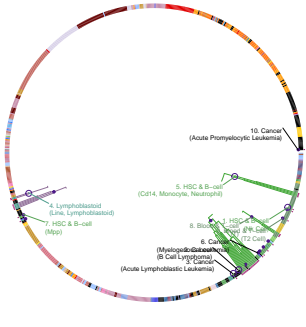

Red blood cell count

29403010

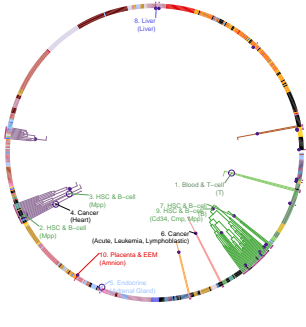

Neutrophil percentage of white cells

27863252

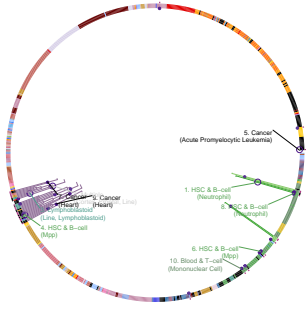

Monocyte count

27863252

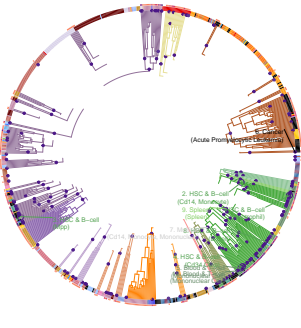

Monocyte percentage of white cells

27863252

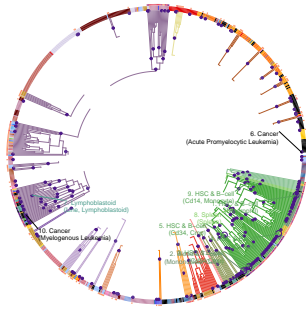

Granulocyte percentage of myeloid white cells

27863252

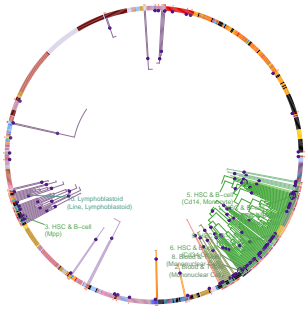

Mean corpuscular volume

27863252

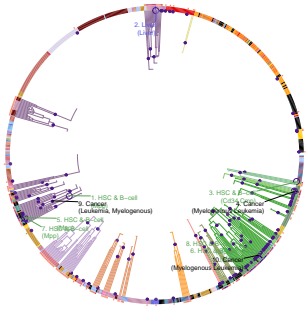

Mean corpuscular hemoglobin

27863252

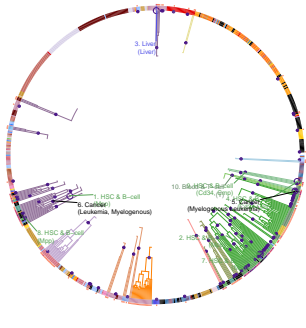

White blood cell count (basophil)

29403010

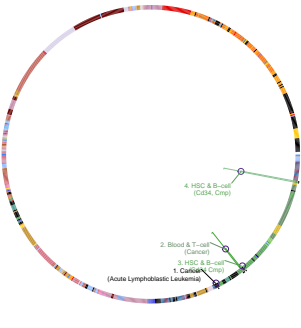

Myeloid white cell count

27863252

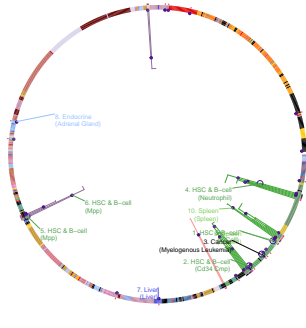

Itch intensity from mosquito bite

28199895

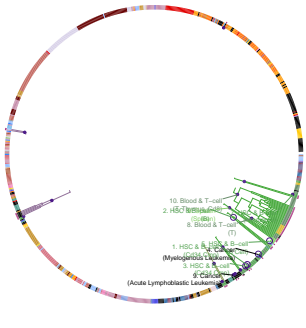

Red blood cell traits

23225217

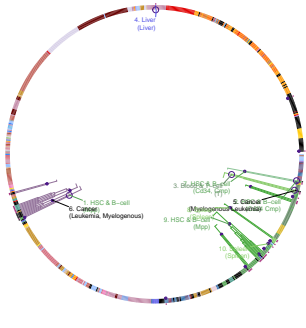

Heart rate variability traits (SDNN)

28613276

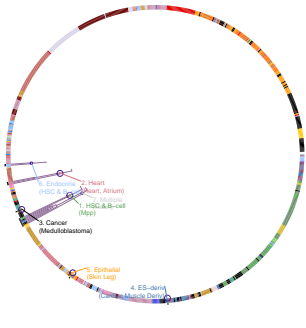

White blood cell count

30595370

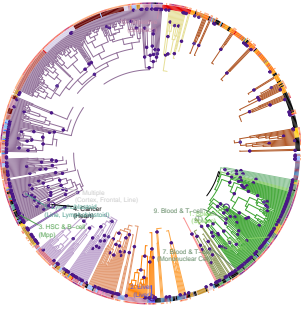

White blood cell count

27863252

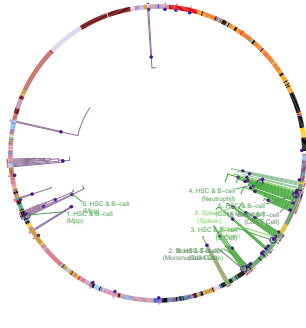

Diastolic blood pressure x smoking status (ever vs never) interaction (2d test)

28199895

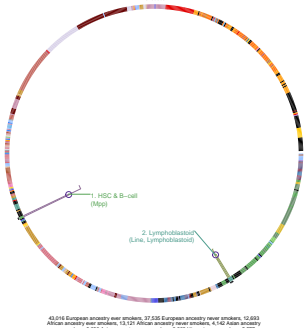

Allergic rhinitis

30013184

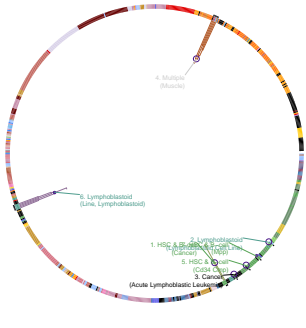

Cognitive ability

29186694

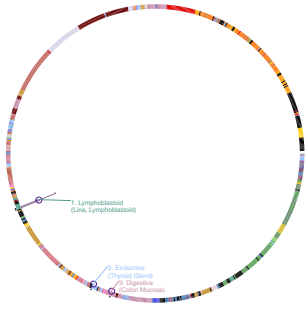



**Psoriasis**

23143694

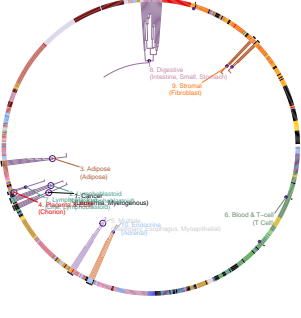

10,588 European ancestry cases, 22,808 European ancestry controls

Iron status biomarkers (ferritin levels)

28334935

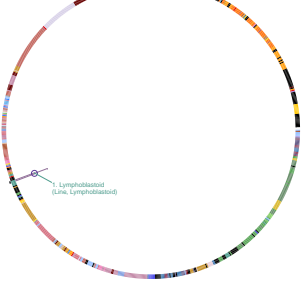

13,375 Hispanic/Latino individuals

Itch intensity from mosquito bite adjusted by bite size

2118888

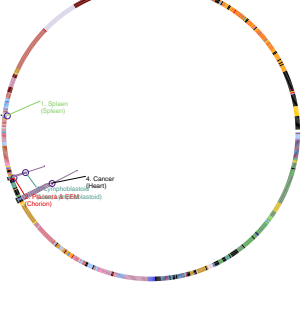

41,305 European ancestry men and 43,369 European ancestry women

QT interval (sulfonylurea treatment interaction)

27958378

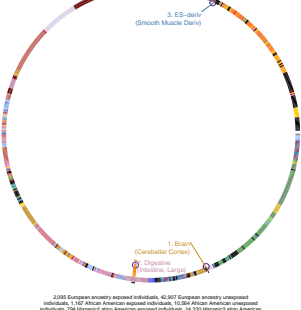

2,008 European ancestry exposed individuals, 42,507 European ancestry unexposed individuals, 1,102 African ancestry exposed individuals, 18,554 African ancestry unexposed individuals, The HapMap/LCAce American exposed individuals, 14,330 Hispanic/Latino American unexposed individuals

Well-being spectrum (multivariate analysis)

30643256

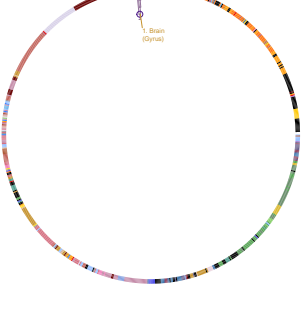

2,083,151 European ancestry individuals

**Height**

25282103

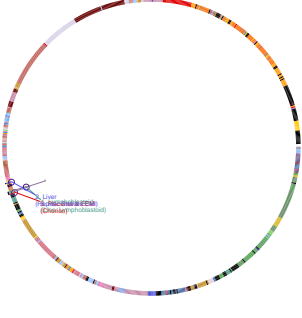

253,288 European ancestry individuals

Feeling lonely

29503282

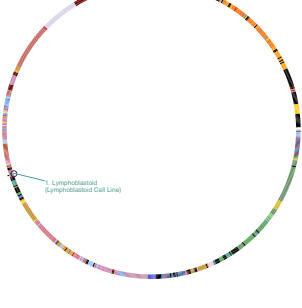

274,303 European ancestry individuals

Celiac disease or Rheumatoid arthritis

21383967

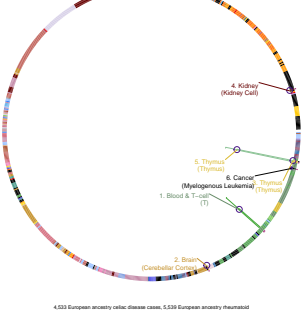

4,033 European ancestry celiac disease cases, 5,534 European ancestry Rheumatoid arthritis cases, 27,381 European ancestry controls

Smoking initiation (ever regular vs never regular)

30643251

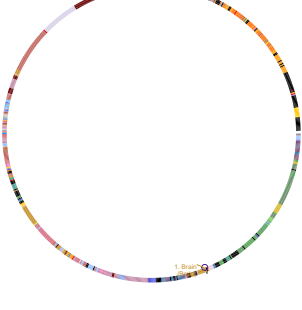

up to 1,232,091 European ancestry individuals

Neuroticism

29942085

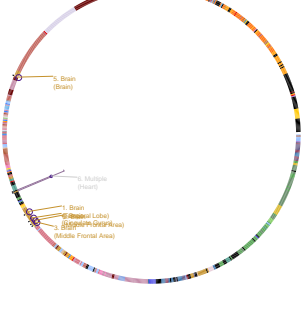

445,484 European ancestry individuals

**Obstructive sleep apnea trait (average respiratory event duration)**

3497732

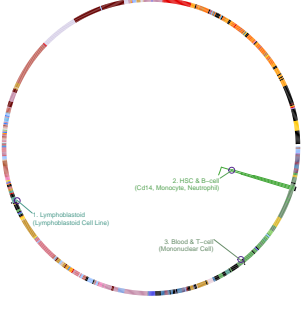

10,238 Hispanic/Latino American ancestry individuals

Allergy

27182965

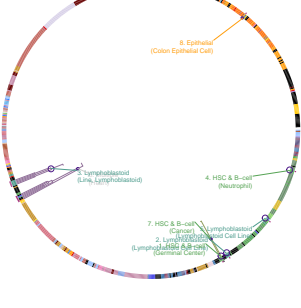

68,870 European ancestry cases, 113,788 European ancestry controls

Headache

26397368

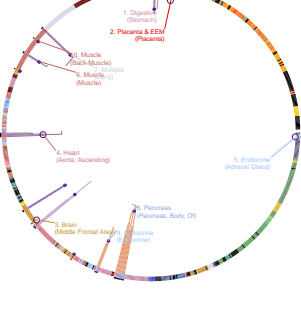

74,461 British ancestry cases, 149,321 British ancestry controls

Age at first sexual intercourse

27089180

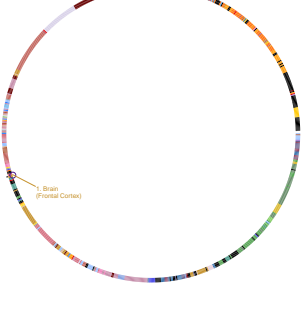

58,357 British ancestry males, 66,310 British ancestry females

Smoking initiation (ever regular vs never regular) (MTAG)

30643250

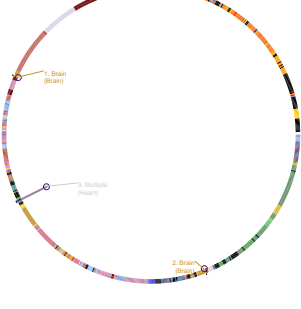

up to 1,338,002 European ancestry individuals

**Sleep duration (short sleep)**

30846698

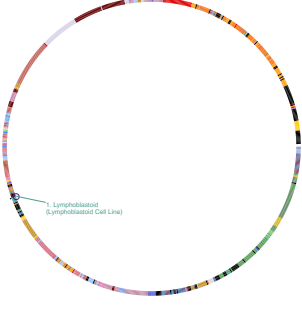

106,102 European ancestry cases, 305,740 European ancestry controls

Systemic seropositive rheumatic diseases (Systemic sclerosis or systemic lupus erythematosus or rheumatoid arthritis or idiopathic inflammatory myopathies)

27182965

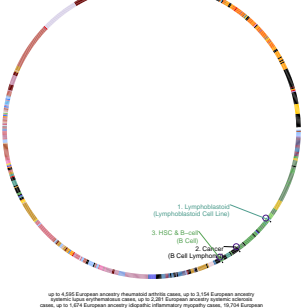

up to 4,656 European ancestry rheumatoid arthritis cases, up to 3,154 European ancestry systemic lupus erythematosus cases, up to 2,891 European ancestry systemic sclerosis cases, up to 1,074 European ancestry idiopathic inflammatory myopathies cases, 50,214 European ancestry controls

Asthma

27182965

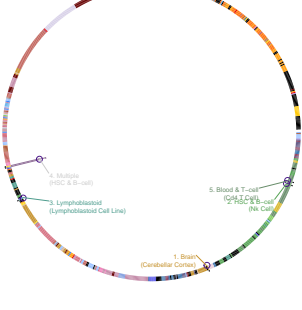

26,389 European ancestry cases, 128,843 European ancestry controls

Cholesterol, total

28270201

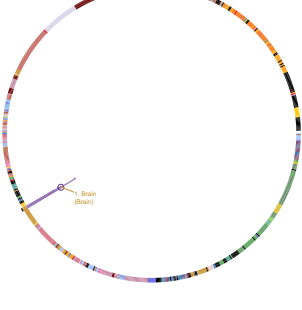

15,259 British ancestry females from 682 families

General risk tolerance (MTAG)

30643258

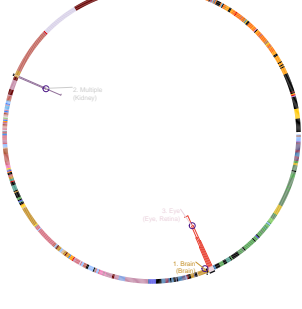

675,303 European ancestry individuals

**Systolic blood pressure x smoking status (ever vs never) interaction (2df test)**

262654

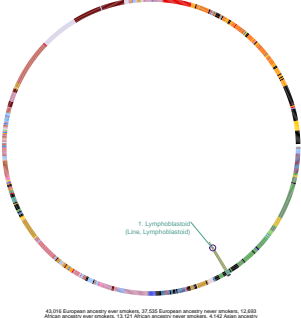

43,041 European ancestry ever smokers, 37,031 European ancestry never smokers, 12,893 African ancestry ever smokers, 11,171 African ancestry never smokers, 47,411 Asian ancestry ever smokers, 3,256 Asian ancestry never smokers, 1,229 Hispanic ancestry ever smokers, 5,177 Hispanic ancestry never smokers

Height

29782485

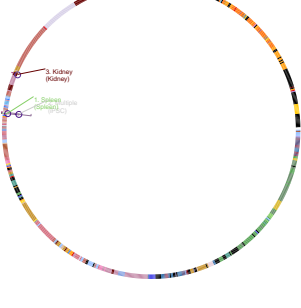

202,288 European ancestry individuals

Waist-hip ratio

20326229

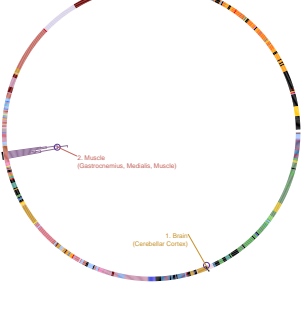

Up to 77,167 European ancestry individuals

Neuroticism

30643256

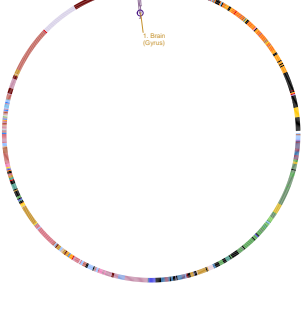

53,763 European ancestry individuals

Lactate dehydrogenase levels

29403010

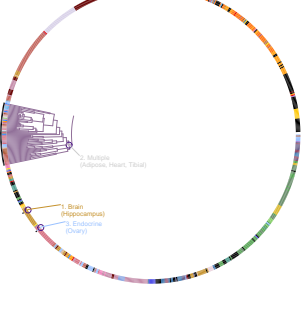

136,313 Japanese ancestry individuals

Educational attainment (years of education)  
30595370

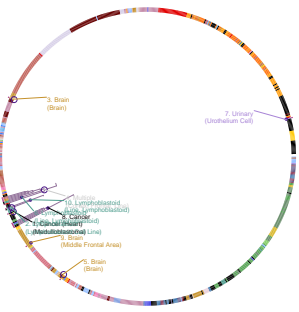

approximately 45,000 European ancestry individuals

Factor VII activity  
30642921

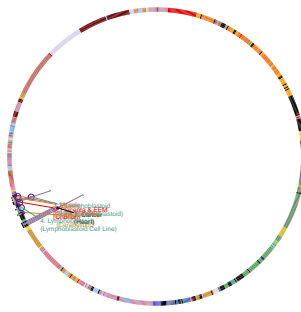

26,014 European ancestry individuals, 3,403 African ancestry individuals

Self-reported math ability (MTAG)  
30038396

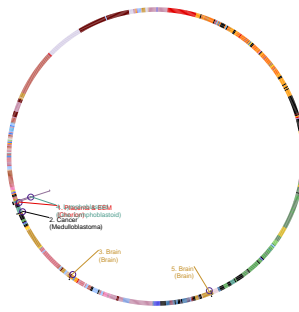

670,471 European ancestry individuals

Highest math class taken (MTAG)  
30038396

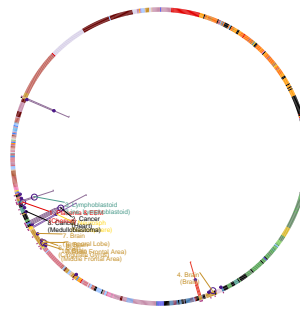

811,530 European ancestry individuals

Educational attainment (years of education)  
30038396

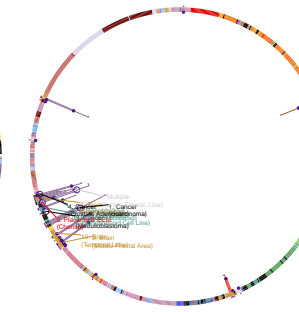

up to 1,511,881 European ancestry individuals

Educational attainment (MTAG)  
30038396

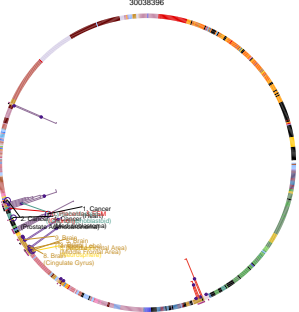

1,241,408 European ancestry individuals

Depressed affect  
29942085

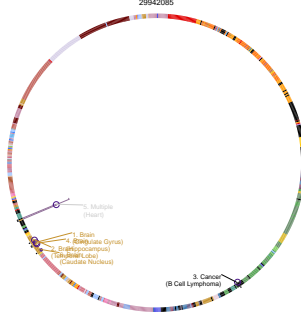

327,821 European ancestry individuals

Self-reported math ability  
30038396

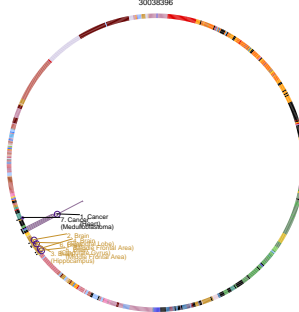

564,698 European ancestry individuals

Post bronchodilator FEV1/FVC ratio  
28634245

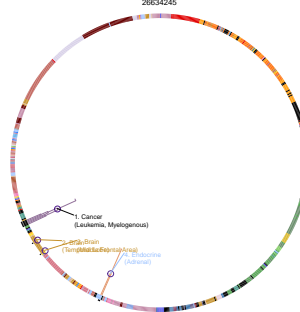

10,046 European ancestry current and former smoker individuals, 3,280 African American current and former smoker individuals, 176 cancer and former smoker individuals

Intelligence  
28530673

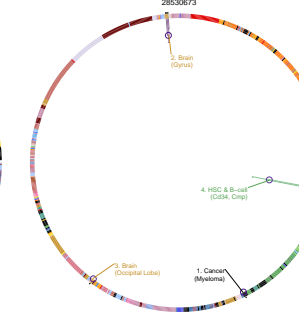

up to 50,709 European ancestry adults, up to 10,500 European ancestry children

Cognitive performance (MTAG)  
30038396

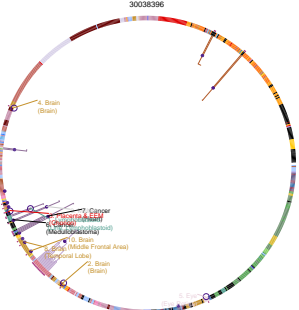

402,380 European ancestry individuals

Intelligence (MTAG)  
29226435

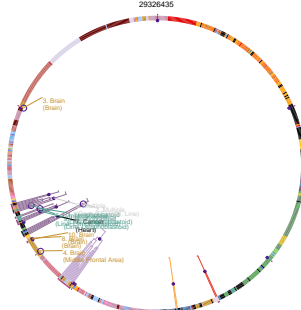

120,044 British ancestry individuals, 127,546 individuals

Lung function (FVC)  
30061609

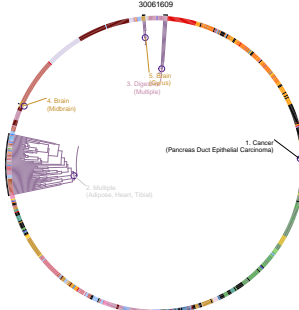

60,552 European ancestry individuals, 8,429 African individuals, 9,309 African ancestry individuals, 11,775 Hispanic individuals

Glycated hemoglobin levels  
24647736

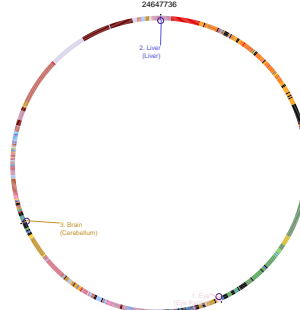

17,200 East Asian ancestry individuals, 1,727 Malay ancestry individuals

Macular thickness  
36536121

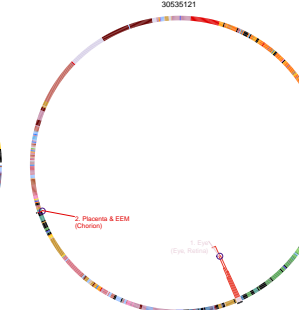

58,814 European ancestry individuals

Systolic blood pressure  
25249183

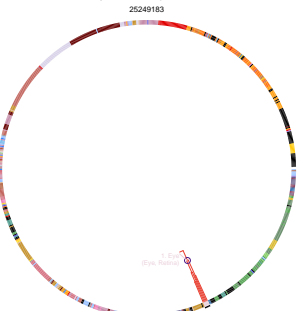

11,816 Han Chinese ancestry individuals

Diastolic blood pressure  
25249183

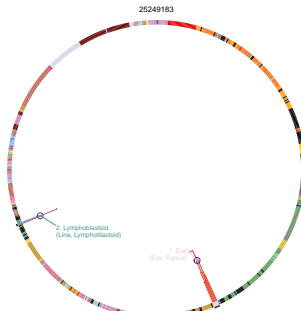

11,816 Han Chinese ancestry individuals

Reaction time  
29844566

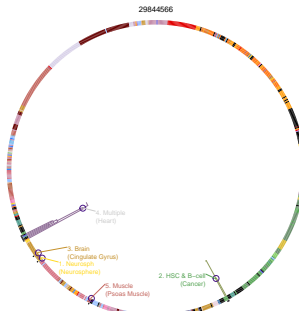

300,000 European ancestry individuals

Optic disc area  
28073927

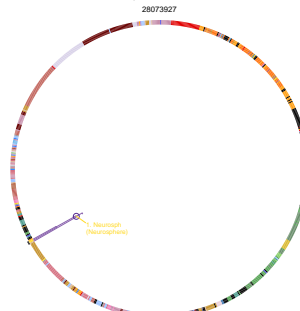

20,373 European ancestry individuals, 2,151 European Russian (biodivergenet isolates) individuals

Male-pattern baldness  
28196072

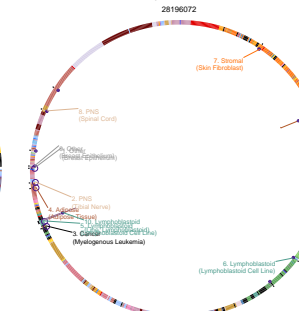

52,814 British ancestry males

Pulse pressure  
29403010

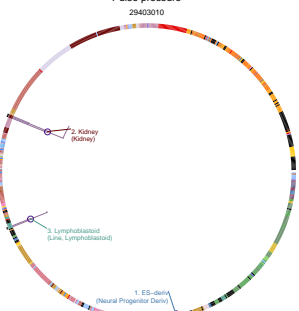

138,149 Japanese ancestry individuals

Diastolic blood pressure  
29403010

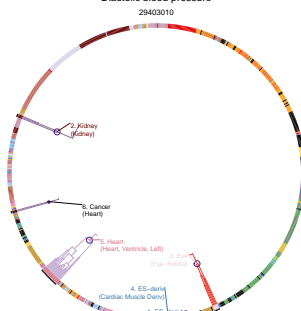

138,149 Japanese ancestry individuals

Lung function (FVC)  
29166213

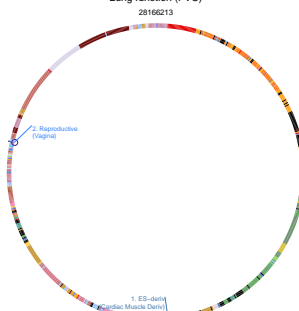

48,843 European ancestry individuals

Total body bone mineral density (age 45-60)  
29304378

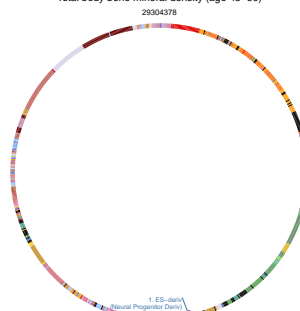

18,865 European individuals

Waist-to-hip ratio adjusted for BMI (age <50)  
26428971

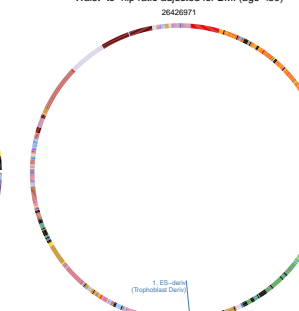

up to 43,776 European ancestry men, up to 10,538 European ancestry women

Alcohol consumption (drinks per week)

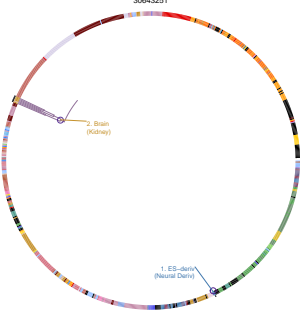

Waist-to-hip ratio adjusted for body mass index

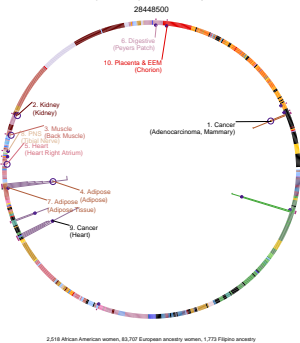

Waist-to-hip ratio adjusted for BMI in active individuals

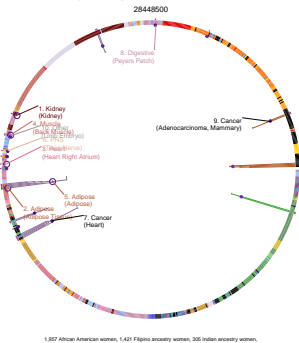

Microalbuminuria

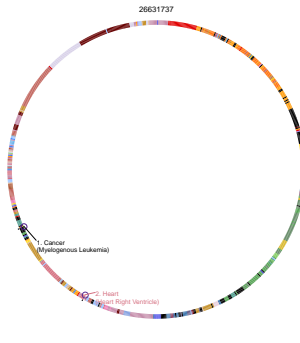

Diastolic blood pressure x alcohol consumption interaction (Zdf test)

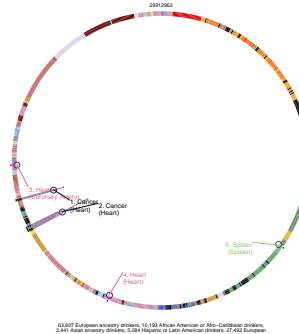

Endometrial cancer

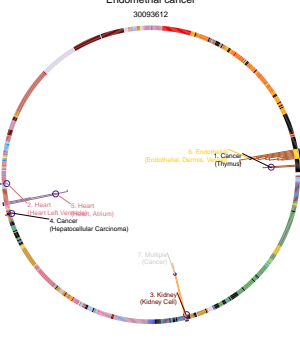

High light scatter reticulocyte count

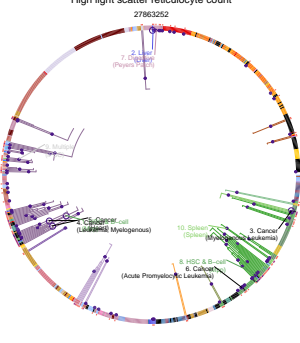

Non-albumin protein levels

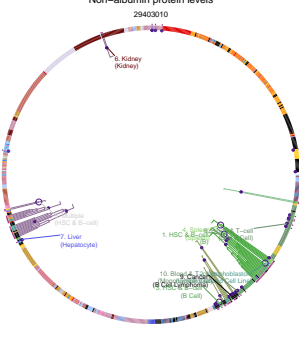

Height

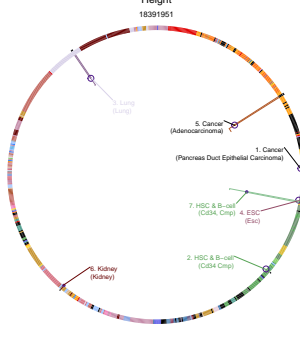

Mean corpuscular volume

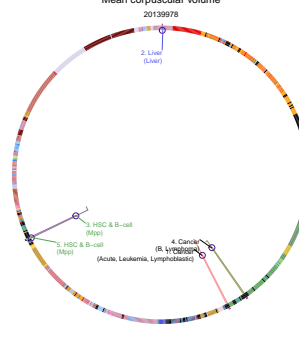

Serum total protein level

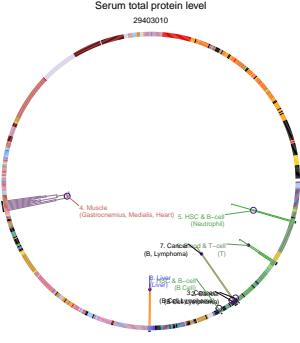

Platelet count

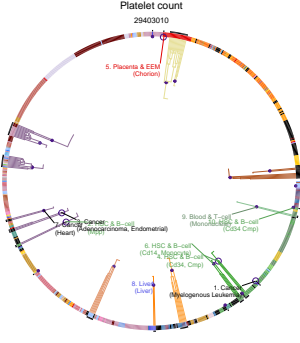

Urate levels (BMI interaction)

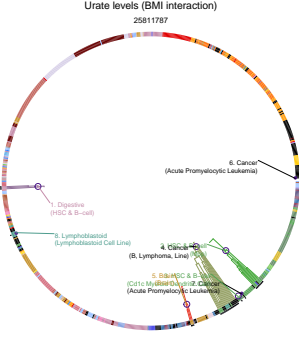

Benign prostatic hyperplasia and lower urinary tract symptoms

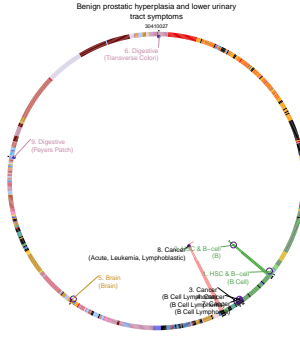

Parental longevity (combined parental attained age, Maternal residuals)

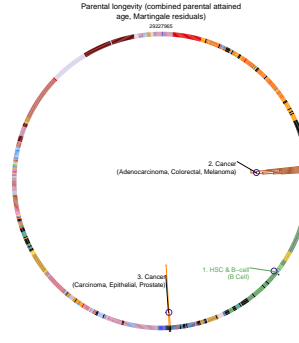

Hair color

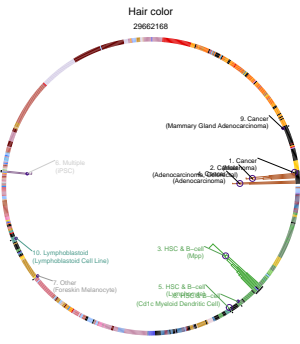

Tonsillectomy

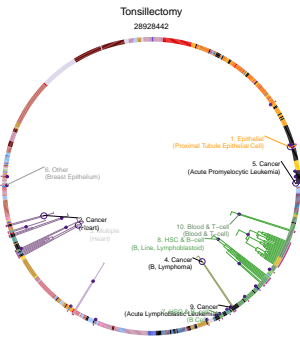

Mean arterial pressure x alcohol consumption (light vs heavy) interaction (Zdf test)

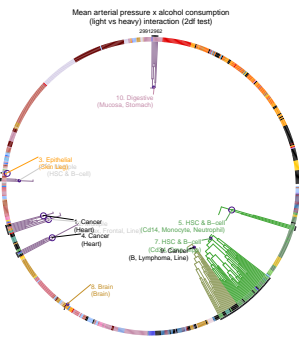

Vertical cup-disc ratio

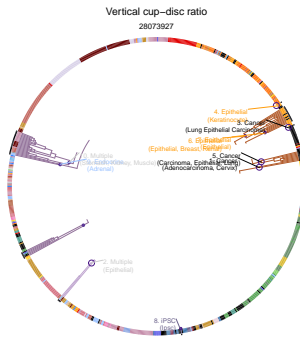

Neutrophil count

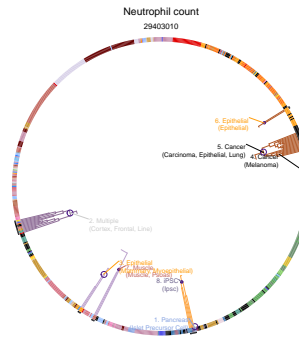

Pulmonary function (smoking interaction)

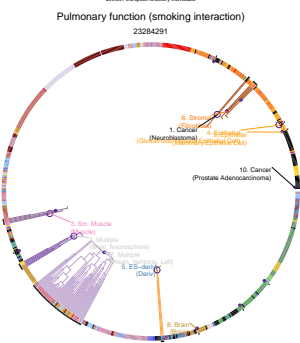

Systemic blood pressure x alcohol consumption (light vs heavy) interaction (Zdf test)

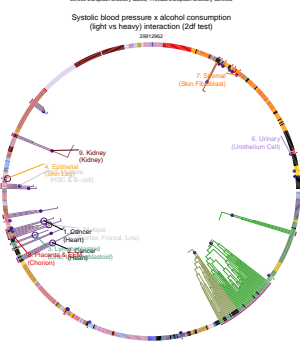

Body fat distribution (trunk fat ratio)

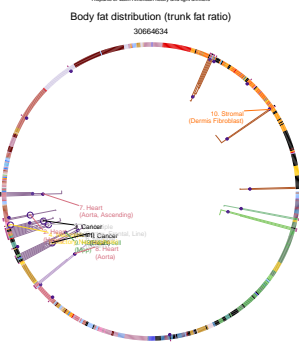

Male-pattern baldness

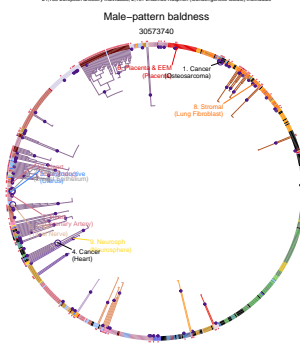

Waist-to-hip ratio adjusted for BMI x sex x age interaction (Zdf test)

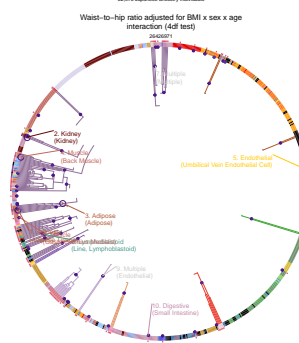

Endometrial cancer

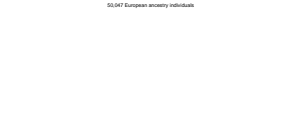

Platelet count

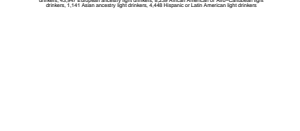

Urate levels (BMI interaction)

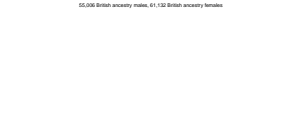

Benign prostatic hyperplasia and lower urinary tract symptoms

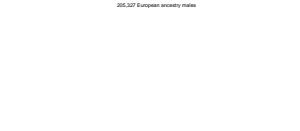

Parental longevity (combined parental attained age, Maternal residuals)

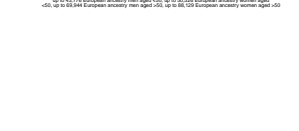





Diastolic blood pressure  
27841878

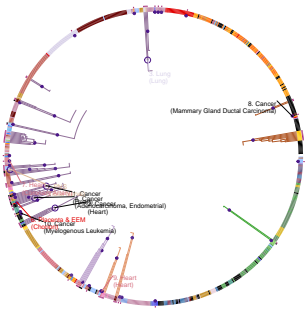

Waist-to-hip ratio adjusted for BMI x sex interaction  
26426971

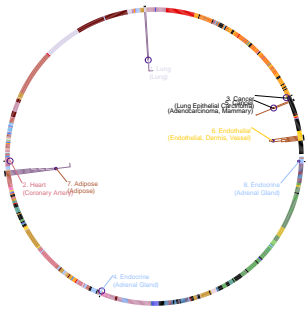

Homeostasis model assessment of beta-cell function  
20081858

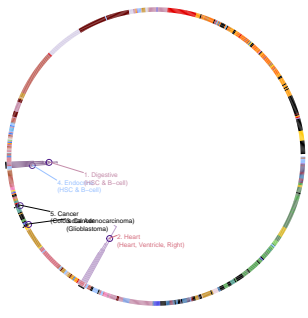

Colorectal cancer  
26151821

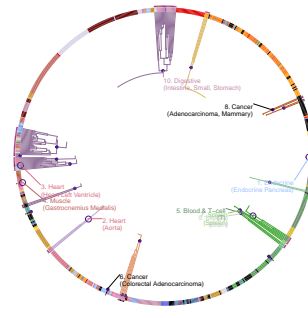

Colorectal cancer  
29917119

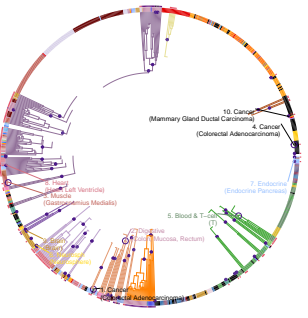

196,228 European ancestry individuals, 8,231 Latino individuals, 3,058 African ancestry individuals, 2,222 Ashkenazi Jewish individuals, 7,701 East Asian ancestry individuals, 2,122 South Asian ancestry individuals, 1,173 French Canadian ancestry individuals

up to 113,700 European ancestry men, up to 138,855 European ancestry women

36,466 European ancestry individuals

18,299 European ancestry cases, 18,838 European ancestry controls

34,948 European ancestry cases, 30,846 European ancestry controls

Hair color  
30595370

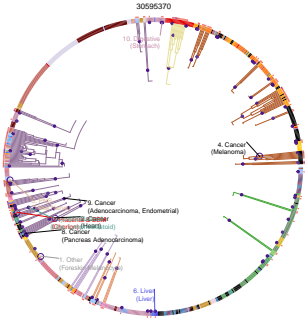

Brown vs. black hair color  
30531825

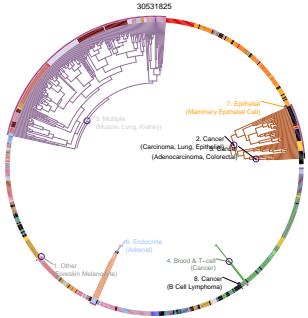

Blond vs. brown/black hair color  
30531825

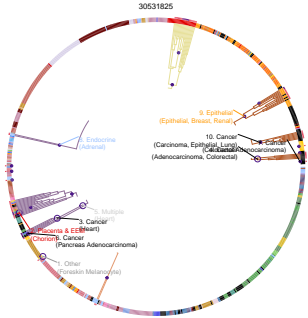

Low tan response  
29739929

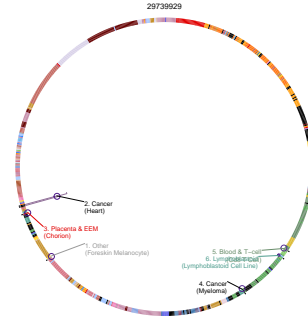

Diastolic blood pressure  
30224653

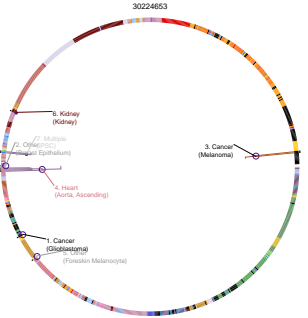

approximately 102,000 European ancestry individuals

300,236 British ancestry brown hair individuals, 11,526 British ancestry black hair individuals

39,387 British ancestry blond hair individuals, 263,503 British ancestry brown or black non-blond

42,788 European ancestry low tanning cases, 74,528 European ancestry moderate and high tanning controls

72,691 European ancestry individuals

Nevus count or cutaneous melanoma  
30429489

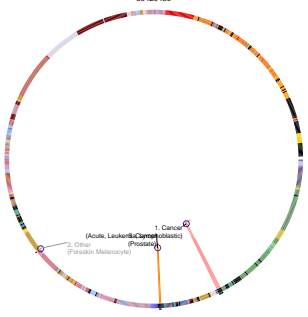

Sitting height ratio  
2885694

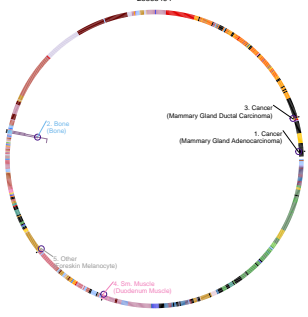

Diastolic blood pressure  
27618447

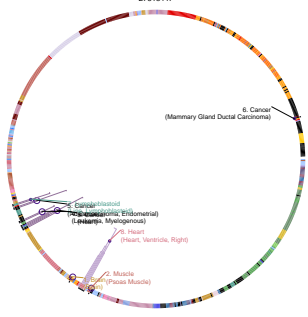

Systolic blood pressure x alcohol consumption interaction (2df test)  
2919262

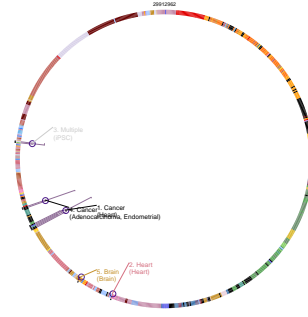

Waist circumference adjusted for body mass index  
25672412

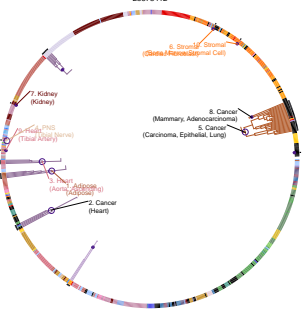

Waist circumference adjusted for BMI (adjusted for smoking behaviour)  
96181

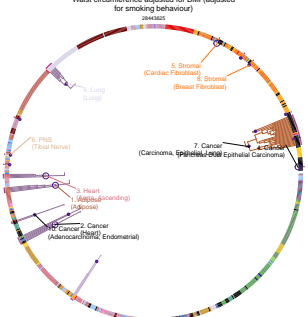

Waist circumference adjusted for BMI (joint analysis main effects and smoking interaction)  
964325

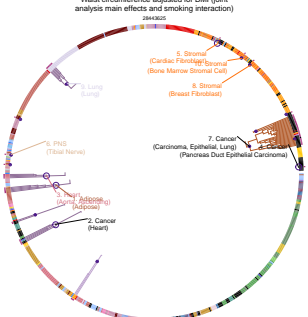

Waist circumference adjusted for BMI in non-smokers  
28443625

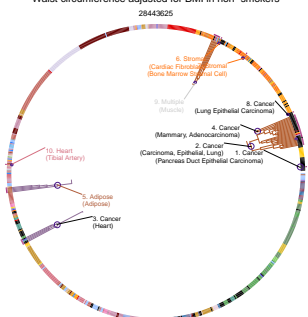

Mean corpuscular hemoglobin  
20139978

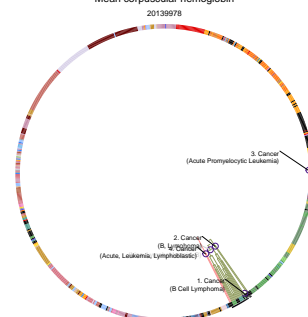

Osteoarthritis  
30664745

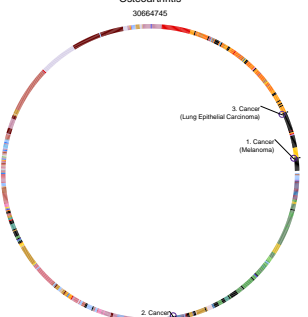

Number of sexual partners  
30643258

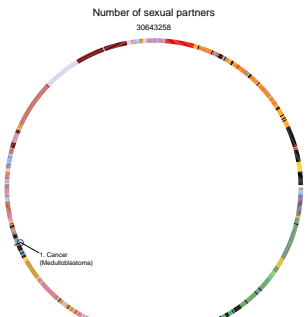

Smoking cessation  
30643251

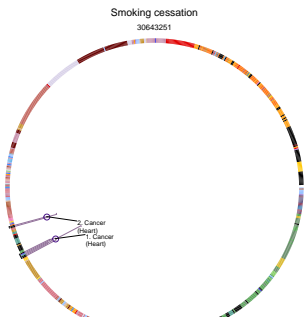

Smoking behaviour (cigarettes smoked per day)  
30643251

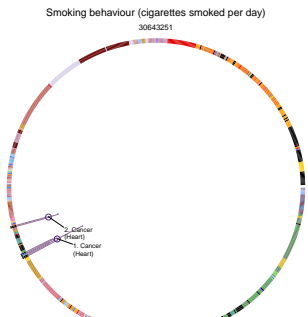

Smoking initiation  
30617275

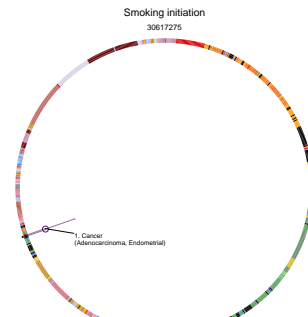

Body fat percentage  
30593688

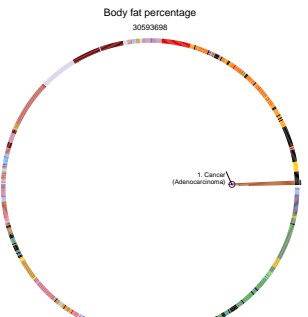

371,711 European ancestry individuals

up to 542,218 European ancestry individuals

up to 377,324 European ancestry individuals

324,851 European ancestry individuals, 21,562 South Asian ancestry individuals

70,793 European ancestry female individuals, 65,261 European ancestry male individuals

Nevus count  
30429480

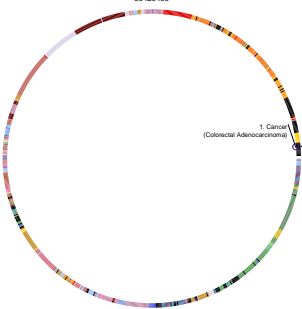

Circulating fibroblast growth factor 23 levels  
30217807

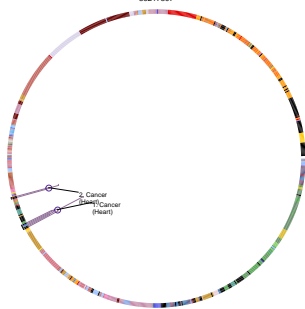

Highest math class taken  
30038396

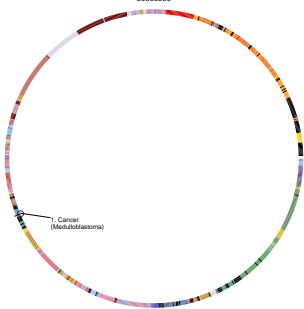

Depression (broad)  
29662059

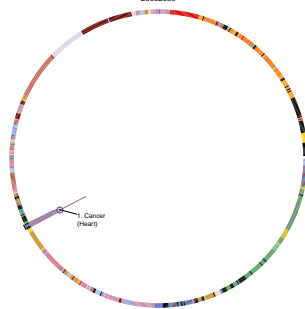

Calcium levels  
29403010

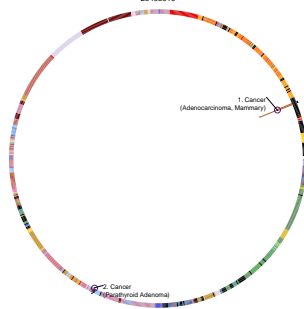

Plantar warts  
28928442

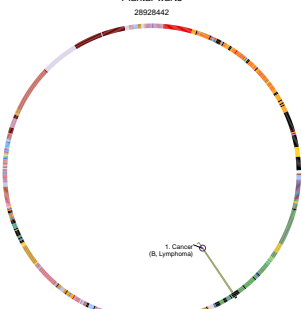

Lung cancer in ever smokers  
28604730

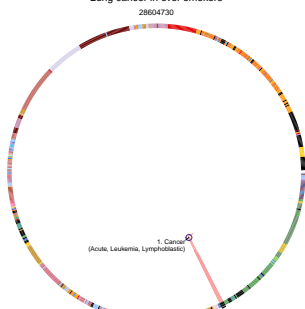

Lung cancer  
28604730

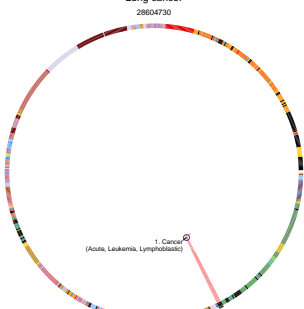

Type 2 diabetes  
28566273

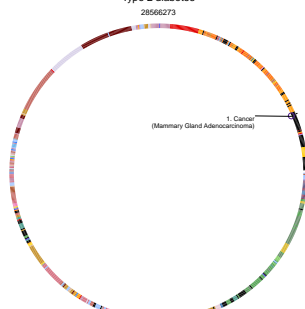

Iron status biomarkers (transferrin saturation)  
28334935

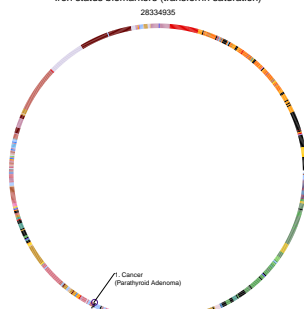

Body mass index  
2366352

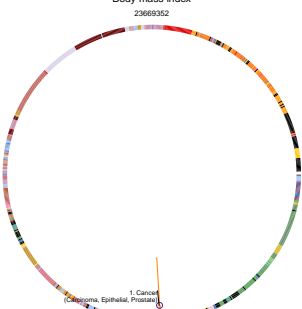

Visceral adipose tissue adjusted for BMI  
22589738

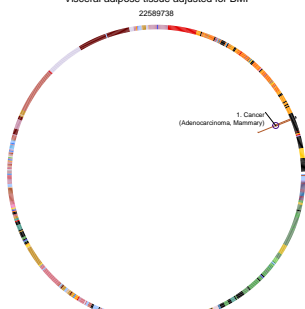

Coronary artery disease or ischemic stroke  
24262225

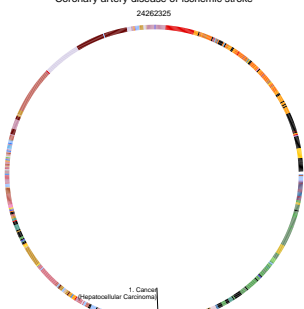

Coronary artery disease or large artery stroke  
24262225

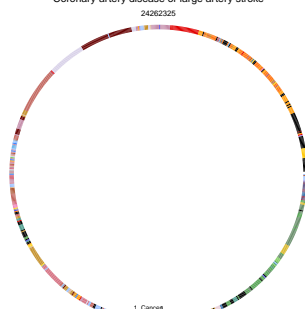

Urate levels in lean individuals  
25811787

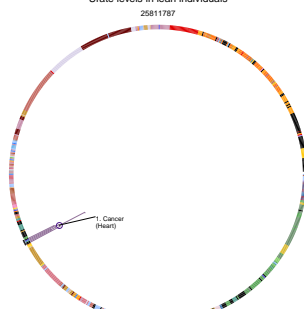

Cutaneous malignant melanoma  
26237428

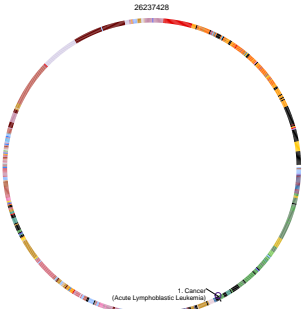

Mean arterial pressure  
26390057

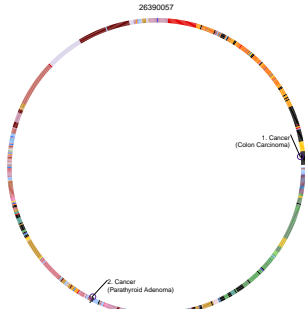

Body mass index  
26426971

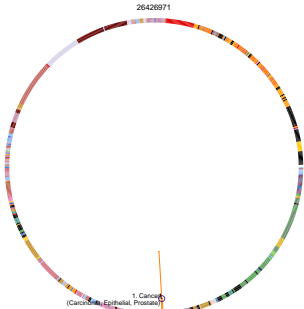

Childhood body mass index  
26604143

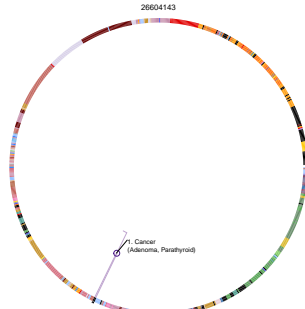

Glomerular filtration rate in non diabetics (creatinine)  
26831199

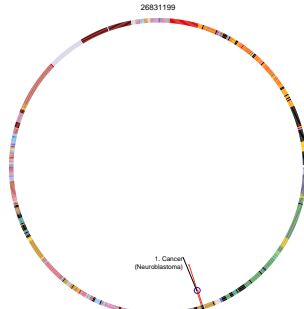

Positive affect  
27089181

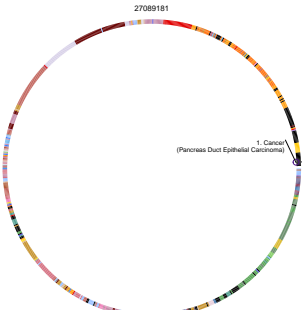

Chronotype  
27494321

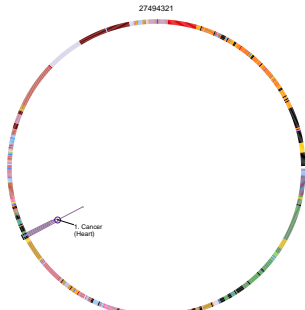

Morning vs. evening chronotype  
27494321

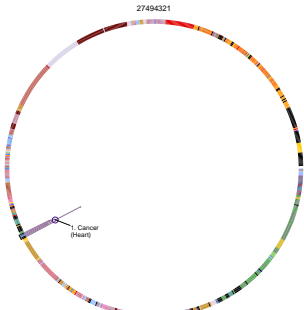

QRS complex (Cornell)  
27659466

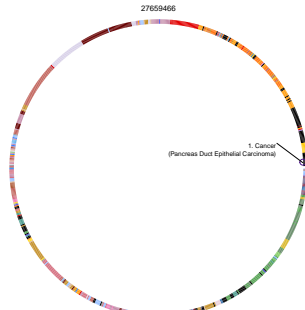

Cognitive function  
28093568

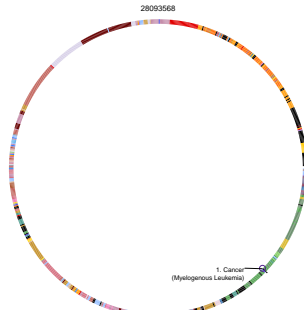

182,261 Bonferroni (log<sub>10</sub>-transformed) values. Self (blue) and genetic (red) values. Via (blue) and genetic (red) values. Chromosome: Position (Mb) and recombination rate (cM/Mb) and other European ancestry individuals.

127,888 British individuals.

114,765 British individuals.

up to 16,172 European ancestry individuals, up to 800 Orkney (founder genetic isolates) individuals.

up to 35,238 European ancestry individuals.









Lung function (FVC)  
30595370

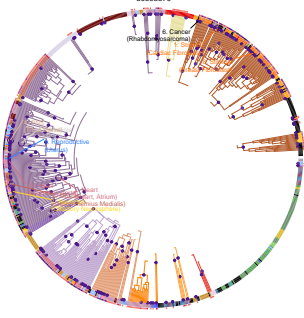

approximately 372,000 European ancestry individuals

Heel bone mineral density  
28969591

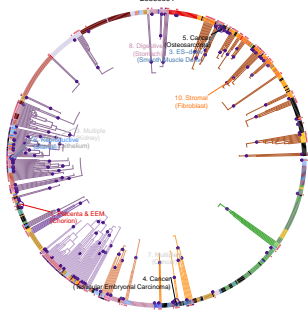

70,967 European ancestry women, 60,405 European ancestry men

Heel bone mineral density  
30598549

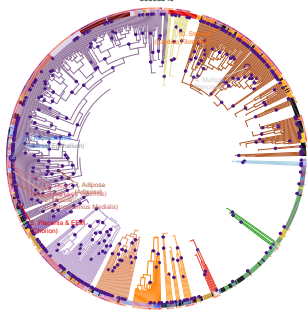

426,804 Brain ancestry individuals

Waist-hip ratio  
30595370

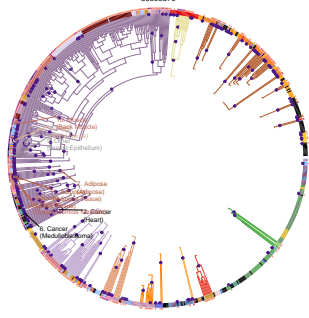

approximately 428,000 European ancestry individuals

Waist-to-hip ratio adjusted for BMI  
26426971

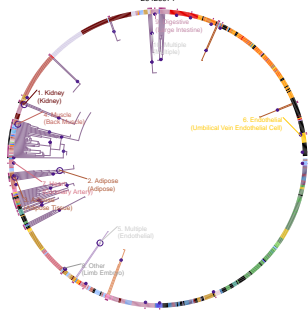

up to 113,726 European ancestry men, up to 138,665 European ancestry women

Height  
28270201

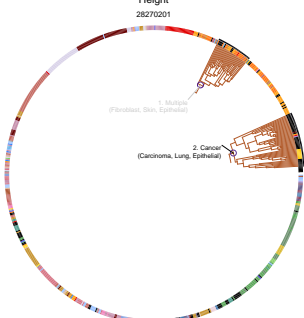

10,862 British ancestry individuals from 6803 families

Type 2 diabetes  
30595370

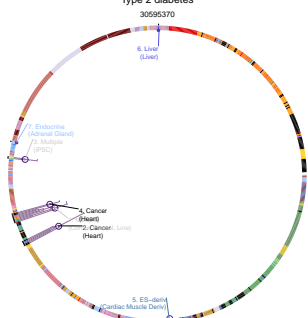

approximately 650,000 European ancestry individuals

Feeling tense  
29500382

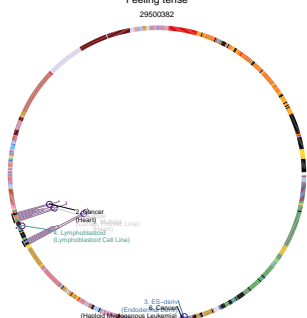

271,318 European ancestry individuals

Osteoarthritis (hip)  
30274069

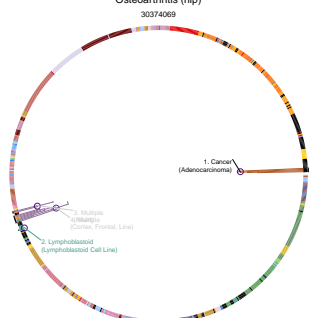

17,161 European ancestry cases, 506,630 European ancestry controls

Waist-to-hip ratio adjusted for BMI (additive genetic model)  
30595370

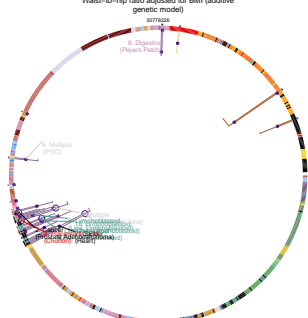

285,465 European ancestry individuals, up to 16,667 African American individuals, up to 24,215 South Asian ancestry individuals, up to 8,600 East Asian ancestry individuals, up to 2,651 Hispanic/Latino ancestry individuals

QT interval  
23186209

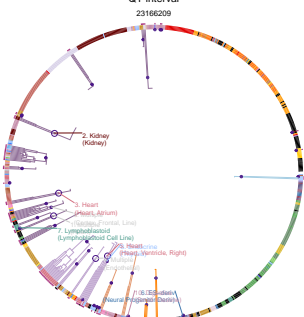

13,165 African American individuals

Systolic blood pressure  
28729976

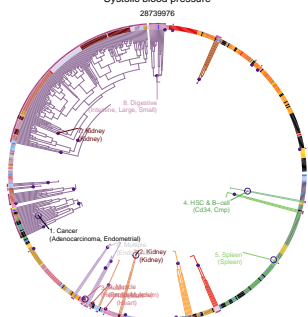

103,124 European ancestry individuals

Lung function (FEV1)  
30061698

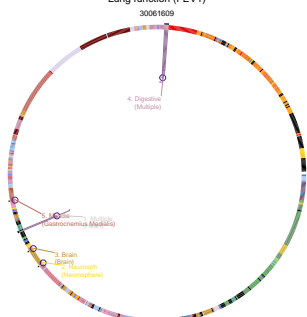

65,512 European ancestry individuals, 8,420 African individuals, 9,328 Korean ancestry individuals, 11,775 Hispanic individuals

Type 2 diabetes  
29632382

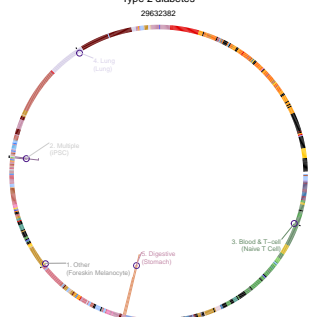

46,288 European ancestry cases, 565,271 European ancestry controls, 33,136 African American, East Indian, Hispanic/Latino or South Asian cases, 126,161 African American, East Asian, Hispanic/Latino or South Asian controls

Calcium levels  
24068962

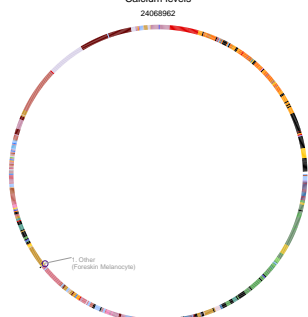

38,400 European ancestry individuals
